# Supplementary material for: Spatial and temporal activity patterns of Golden takin (Budorcas taxicolor bedfordi) recorded by camera trapping
Source: PeerJ. 2020 Nov 26;8:e10353. doi: 10.7717/peerj.10353 (PMC7700736; doi:10.7717/peerj.10353)
Supplement: Supplemental Information 1 — The filtrate information for golden takins in each camera survey from April 2014 to October 2017, Photograph name (column B), Site ID (column C), Photograph data and time (column D and E), Species type, name and population in each photograph (column F G and H), GPS information (column I, J and K), the date the placed in operation and the date the last photographs was taken if a malfunction had occurred (column L and M). The photographs captured by the infrared camera collected from each site are all organized as they are named after the camera placement date and camera number. For example, in the folder name 20140417-03, 20140417 represents the placement date, 03 represents the camera number. Each photograph in each folder is renamed with a unique serial number to distinguish them from each other. For example, in CQ-20140417-03-0073, CQ is short for Changqing, 0073 represents the photograph name. [file peerj-08-10353-s001.xlsx]

## Sheet: Sheet1
ID	Photograph Name	Site ID	Photograph Date	Photograph Time	Type	Species Name	Population	Longitude	Latitude	Elevation	Placement date	Last date
1	CQ-20140417-03-0073	20140417-03	2014/04/30	17:25:12	mammal	golden taikn	1	33.4694	107.735	1581	2014-04-17	2014/8/20
2	CQ-20140417-04-0013	20140417-04	2014/4/21	12:47:48	mammal	golden taikn	1	33.514	107.665	1328	2014-04-17	2014/07/05
3	CQ-20140417-04-0016	20140417-04	2014/04/21	16:30:28	mammal	golden taikn	1	33.514	107.665	1328	2014-04-17	2014/07/05
4	CQ-20140417-65-0014	20140417-65	2013/4/24	18:04:40	mammal	golden taikn	1	33.5952	107.604	1684	2014-04-17	2014-08-18
5	CQ-20140417-65-0021	20140417-65	2013/05/01	20:04:46	mammal	golden taikn	1	33.5952	107.604	1684	2014-04-17	2014-08-18
6	CQ-20140422-100-0037	20140422-100	2014/05/06	18:04:31	mammal	golden taikn	1	33.6571	107.603	1775	2014-04-22	2014-08-19
7	CQ-20140422-100-0043	20140422-100	2014/05/07	09:16:03	mammal	golden taikn	1	33.6571	107.603	1775	2014-04-22	2014-08-19
8	CQ-20140422-100-0105	20140422-100	2014/06/09	18:12:38	mammal	golden taikn	1	33.6571	107.603	1775	2014-04-22	2014-08-19
9	CQ-20140422-100-0225	20140422-100	2014/07/16	07:48:06	mammal	golden taikn	1	33.6571	107.603	1775	2014-04-22	2014-08-19
10	CQ-20140422-68-0011	20140422-68	2014/04/24	15:53:59	mammal	golden taikn	1	33.6785	107.536	1822	2014-04-22	2014-08-18
11	CQ-20140422-72-0009	20140422-72	2014/04/21	22:57:31	mammal	golden taikn	1	33.596	107.623	1589	2014-04-17	2014-08-19
12	CQ-20140422-72-0037	20140422-72	2014/05/03	18:08:22	mammal	golden taikn	1	33.596	107.623	1589	2014-04-17	2014-08-19
13	CQ-20140422-83-0028	20140422-83	2014/04/25	06:27:07	mammal	golden taikn	1	33.6697	107.536	1763	2014-04-22	2014-08-18
14	CQ-20140422-91-0011	20140422-91	2014/04/25	22:36:32	mammal	golden taikn	1	33.6618	107.592	1712	2014-04-22	2014-08-19
15	CQ-20140422-91-0017	20140422-91	2014/05/03	06:20:01	mammal	golden taikn	1	33.6618	107.592	1712	2014-04-22	2014-08-19
16	CQ-20140422-91-0019	20140422-91	2014/05/05	07:00:25	mammal	golden taikn	1	33.6618	107.592	1712	2014-04-22	2014-08-19
17	CQ-20140422-91-0025	20140422-91	2014/05/07	01:54:26	mammal	golden taikn	1	33.6618	107.592	1712	2014-04-22	2014-08-19
18	CQ-20140422-91-0041	20140422-91	2014/05/09	18:17:21	mammal	golden taikn	1	33.6618	107.592	1712	2014-04-22	2014-08-19
19	CQ-20140422-91-0045	20140422-91	2014/05/09	21:51:30	mammal	golden taikn	1	33.6618	107.592	1712	2014-04-22	2014-08-19
20	CQ-20140422-91-0047	20140422-91	2014/05/10	00:10:01	mammal	golden taikn	1	33.6618	107.592	1712	2014-04-22	2014-08-19
21	CQ-20140422-91-0057	20140422-91	2014/05/11	16:50:37	mammal	golden taikn	1	33.6618	107.592	1712	2014-04-22	2014-08-19
22	CQ-20140422-91-0059	20140422-91	2014/05/12	18:25:04	mammal	golden taikn	1	33.6618	107.592	1712	2014-04-22	2014-08-19
23	CQ-20140422-91-0073	20140422-91	2014/05/18	15:23:19	mammal	golden taikn	1	33.6618	107.592	1712	2014-04-22	2014-08-19
24	CQ-20140422-91-0075	20140422-91	2014/05/19	19:05:30	mammal	golden taikn	1	33.6618	107.592	1712	2014-04-22	2014-08-19
25	CQ-20140423-10-0427	20140423-10	2014/06/02	19:09:19	mammal	golden taikn	1	33.5344	107.669	1255	2014-03-23	2014-08-14
26	CQ-20140423-10-0431	20140423-10	2014/06/03	07:02:14	mammal	golden taikn	1	33.5344	107.669	1255	2014-03-23	2014-08-14
27	CQ-20140423-17-0011	20140423-17	2014/04/29	12:09:01	mammal	golden taikn	2	33.5386	107.637	1550	2014-04-23	2014-07-31
28	CQ-20140423-18-0007	20140423-18	2014/05/03	19:18:29	mammal	golden taikn	1	33.5689	107.64	1812	2014-04-23	2014-08-25
29	CQ-20140423-18-0259	20140423-18	2014/08/23	17:10:23	mammal	golden taikn	1	33.5689	107.64	1812	2014-04-23	2014-08-25
30	CQ-20140427-62-0005	20140427-62	2014/04/27	12:27:04	mammal	golden taikn	4	33.6546	107.627	1800	2014-04-27	2014-09-19
31	CQ-20140427-62-0015	20140427-62	2014/04/27	14:13:11	mammal	golden taikn	2	33.6546	107.627	1800	2014-04-27	2014-09-19
32	CQ-20140427-62-0017	20140427-62	2014/04/30	16:08:17	mammal	golden taikn	3	33.6546	107.627	1800	2014-04-27	2014-09-19
33	CQ-20140427-62-0023	20140427-62	2014/05/04	13:26:36	mammal	golden taikn	2	33.6546	107.627	1800	2014-04-27	2014-09-19
34	CQ-20140427-62-0043	20140427-62	2014/05/23	13:05:58	mammal	golden taikn	2	33.6546	107.627	1800	2014-04-27	2014-09-19
35	CQ-20140427-62-0203	20140427-62	2014/09/14	15:39:29	mammal	golden taikn	1	33.6546	107.627	1800	2014-04-27	2014-09-19
36	CQ-20140427-62-0207	20140427-62	2014/09/14	16:45:31	mammal	golden taikn	1	33.6546	107.627	1800	2014-04-27	2014-09-19
37	CQ-20140427-62-0209	20140427-62	2014/09/14	17:40:12	mammal	golden taikn	1	33.6546	107.627	1800	2014-04-27	2014-09-19
38	CQ-20140427-62-0211	20140427-62	2014/09/16	17:16:10	mammal	golden taikn	1	33.6546	107.627	1800	2014-04-27	2014-09-19
39	CQ-20140427-62-0213	20140427-62	2014/09/16	17:50:09	mammal	golden taikn	1	33.6546	107.627	1800	2014-04-27	2014-09-19
40	CQ-20140427-62-0215	20140427-62	2014/09/17	06:55:21	mammal	golden taikn	1	33.6546	107.627	1800	2014-04-27	2014-09-19
41	CQ-20140427-62-0227	20140427-62	2014/09/17	10:51:20	mammal	golden taikn	1	33.6546	107.627	1800	2014-04-27	2014-09-19
42	CQ-20140427-62-0231	20140427-62	2014/09/17	11:46:44	mammal	golden taikn	1	33.6546	107.627	1800	2014-04-27	2014-09-19
43	CQ-20140427-67-0005	20140427-67	2014/04/28	00:30:37	mammal	golden taikn	1	33.6483	107.634	1902	2014-04-27	2014-09-20
44	CQ-20140427-67-0021	20140427-67	2014/05/09	16:51:58	mammal	golden taikn	1	33.6483	107.634	1902	2014-04-27	2014-09-20
45	CQ-20140427-67-0037	20140427-67	2014/05/10	12:20:40	mammal	golden taikn	1	33.6483	107.634	1902	2014-04-27	2014-09-20
46	CQ-20140427-67-0041	20140427-67	2014/05/14	09:02:24	mammal	golden taikn	1	33.6483	107.634	1902	2014-04-27	2014-09-20
47	CQ-20140427-67-0065	20140427-67	2014/06/09	12:17:56	mammal	golden taikn	1	33.6483	107.634	1902	2014-04-27	2014-09-20
48	CQ-20140427-67-0195	20140427-67	2014/09/16	10:37:53	mammal	golden taikn	1	33.6483	107.634	1902	2014-04-27	2014-09-20
49	CQ-20140427-69-0013	20140427-69	2014/05/09	08:01:34	mammal	golden taikn	1	33.6748	107.652	2064	2014-04-27	2014-09-20
50	CQ-20140427-69-0015	20140427-69	2014/05/09	14:46:42	mammal	golden taikn	1	33.6748	107.652	2064	2014-04-27	2014-09-20
51	CQ-20140427-69-0017	20140427-69	2014/05/09	21:57:19	mammal	golden taikn	1	33.6748	107.652	2064	2014-04-27	2014-09-20
52	CQ-20140427-69-0019	20140427-69	2014/05/10	10:53:39	mammal	golden taikn	1	33.6748	107.652	2064	2014-04-27	2014-09-20
53	CQ-20140427-69-0021	20140427-69	2014/05/11	23:44:18	mammal	golden taikn	1	33.6748	107.652	2064	2014-04-27	2014-09-20
54	CQ-20140427-69-0023	20140427-69	2014/05/16	13:58:29	mammal	golden taikn	1	33.6748	107.652	2064	2014-04-27	2014-09-20
55	CQ-20140427-69-0029	20140427-69	2014/05/18	05:39:44	mammal	golden taikn	1	33.6748	107.652	2064	2014-04-27	2014-09-20
56	CQ-20140427-69-0037	20140427-69	2014/05/24	18:45:46	mammal	golden taikn	1	33.6748	107.652	2064	2014-04-27	2014-09-20
57	CQ-20140427-69-0040	20140427-69	2014/5/26	15:36:56	mammal	golden taikn	1	33.6748	107.652	2064	2014-04-27	2014-09-20
58	CQ-20140427-69-0047	20140427-69	2014/05/31	10:48:24	mammal	golden taikn	1	33.6748	107.652	2064	2014-04-27	2014-09-20
59	CQ-20140427-69-0103	20140427-69	2014/08/18	08:36:12	mammal	golden taikn	1	33.6748	107.652	2064	2014-04-27	2014-09-20
60	CQ-20140427-69-0111	20140427-69	2014/08/24	15:31:53	mammal	golden taikn	1	33.6748	107.652	2064	2014-04-27	2014-09-20
61	CQ-20140427-69-0117	20140427-69	2014/08/28	16:24:30	mammal	golden taikn	1	33.6748	107.652	2064	2014-04-27	2014-09-20
62	CQ-20140427-69-0119	20140427-69	2014/08/29	06:46:34	mammal	golden taikn	1	33.6748	107.652	2064	2014-04-27	2014-09-20
63	CQ-20140427-69-0155	20140427-69	2014/09/09	12:35:58	mammal	golden taikn	1	33.6748	107.652	2064	2014-04-27	2014-09-20
64	CQ-20140427-69-0157	20140427-69	2014/09/09	14:44:52	mammal	golden taikn	1	33.6748	107.652	2064	2014-04-27	2014-09-20
65	CQ-20140427-69-0159	20140427-69	2014/09/14	03:04:50	mammal	golden taikn	1	33.6748	107.652	2064	2014-04-27	2014-09-20
66	CQ-20140427-69-0167	20140427-69	2014/09/14	06:12:38	mammal	golden taikn	1	33.6748	107.652	2064	2014-04-27	2014-09-20
67	CQ-20140427-69-0173	20140427-69	2014/09/17	07:05:59	mammal	golden taikn	1	33.6748	107.652	2064	2014-04-27	2014-09-20
68	CQ-20140427-70-0019	20140427-70	2014/05/23	10:20:07	mammal	golden taikn	3	33.6933	107.666	2395	2014-04-27	2014-07-31
69	CQ-20140427-70-0029	20140427-70	2014/05/25	07:33:42	mammal	golden taikn	1	33.6933	107.666	2395	2014-04-27	2014-07-31
70	CQ-20140427-70-0047	20140427-70	2014/05/30	09:27:57	mammal	golden taikn	1	33.6933	107.666	2395	2014-04-27	2014-07-31
71	CQ-20140427-70-0059	20140427-70	2014/06/01	18:23:14	mammal	golden taikn	1	33.6933	107.666	2395	2014-04-27	2014-07-31
72	CQ-20140427-70-0069	20140427-70	2014/06/08	09:06:39	mammal	golden taikn	1	33.6933	107.666	2395	2014-04-27	2014-07-31
73	CQ-20140427-70-0117	20140427-70	2014/06/21	16:50:45	mammal	golden taikn	1	33.6933	107.666	2395	2014-04-27	2014-07-31
74	CQ-20140427-70-0191	20140427-70	2014/07/08	19:47:32	mammal	golden taikn	1	33.6933	107.666	2395	2014-04-27	2014-07-31
75	CQ-20140427-70-0197	20140427-70	2014/07/08	21:08:16	mammal	golden taikn	1	33.6933	107.666	2395	2014-04-27	2014-07-31
76	CQ-20140427-70-0205	20140427-70	2014/07/08	22:38:13	mammal	golden taikn	1	33.6933	107.666	2395	2014-04-27	2014-07-31
77	CQ-20140427-70-0215	20140427-70	2014/07/09	01:25:06	mammal	golden taikn	1	33.6933	107.666	2395	2014-04-27	2014-07-31
78	CQ-20140427-70-0225	20140427-70	2014/07/09	02:41:39	mammal	golden taikn	1	33.6933	107.666	2395	2014-04-27	2014-07-31
79	CQ-20140427-70-0227	20140427-70	2014/07/09	05:09:18	mammal	golden taikn	1	33.6933	107.666	2395	2014-04-27	2014-07-31
80	CQ-20140427-70-0229	20140427-70	2014/07/09	05:11:10	mammal	golden taikn	1	33.6933	107.666	2395	2014-04-27	2014-07-31
81	CQ-20140427-70-0340	20140427-70	2014/07/18	15:06:01	mammal	golden taikn	1	33.6933	107.666	2395	2014-04-27	2014-07-31
82	CQ-20140427-70-0370	20140427-70	2014/07/19	18:33:24	mammal	golden taikn	1	33.6933	107.666	2395	2014-04-27	2014-07-31
83	CQ-20140427-70-0938	20140427-70	2014/07/27	16:49:19	mammal	golden taikn	1	33.6933	107.666	2395	2014-04-27	2014-07-31
84	CQ-20140427-77-0025	20140427-77	2014/05/07	18:26:36	mammal	golden taikn	2	33.6721	107.635	2088	2014-04-27	2014-09-19
85	CQ-20140427-77-0039	20140427-77	2014/05/08	10:08:38	mammal	golden taikn	2	33.6721	107.635	2088	2014-04-27	2014-09-19
86	CQ-20140427-77-0053	20140427-77	2014/05/08	18:22:31	mammal	golden taikn	1	33.6721	107.635	2088	2014-04-27	2014-09-19
87	CQ-20140427-77-0063	20140427-77	2014/05/09	12:24:45	mammal	golden taikn	2	33.6721	107.635	2088	2014-04-27	2014-09-19
88	CQ-20140427-77-0067	20140427-77	2014/05/11	10:14:25	mammal	golden taikn	1	33.6721	107.635	2088	2014-04-27	2014-09-19
89	CQ-20140427-77-0071	20140427-77	2014/05/12	12:57:01	mammal	golden taikn	1	33.6721	107.635	2088	2014-04-27	2014-09-19
90	CQ-20140427-77-0075	20140427-77	2014/05/13	13:33:35	mammal	golden taikn	1	33.6721	107.635	2088	2014-04-27	2014-09-19
91	CQ-20140427-77-0095	20140427-77	2014/05/23	18:52:08	mammal	golden taikn	1	33.6721	107.635	2088	2014-04-27	2014-09-19
92	CQ-20140427-77-0097	20140427-77	2014/05/23	19:44:02	mammal	golden taikn	1	33.6721	107.635	2088	2014-04-27	2014-09-19
93	CQ-20140427-77-0099	20140427-77	2014/05/25	15:26:52	mammal	golden taikn	1	33.6721	107.635	2088	2014-04-27	2014-09-19
94	CQ-20140427-77-0103	20140427-77	2014/05/26	03:54:00	mammal	golden taikn	1	33.6721	107.635	2088	2014-04-27	2014-09-19
95	CQ-20140427-77-0111	20140427-77	2014/05/27	05:42:28	mammal	golden taikn	1	33.6721	107.635	2088	2014-04-27	2014-09-19
96	CQ-20140427-77-0115	20140427-77	2014/05/28	06:36:05	mammal	golden taikn	1	33.6721	107.635	2088	2014-04-27	2014-09-19
97	CQ-20140427-77-0121	20140427-77	2014/05/31	16:28:56	mammal	golden taikn	1	33.6721	107.635	2088	2014-04-27	2014-09-19
98	CQ-20140427-77-0129	20140427-77	2014/06/08	05:24:46	mammal	golden taikn	1	33.6721	107.635	2088	2014-04-27	2014-09-19
99	CQ-20140427-77-0139	20140427-77	2014/06/13	07:03:33	mammal	golden taikn	1	33.6721	107.635	2088	2014-04-27	2014-09-19
100	CQ-20140427-77-0519	20140427-77	2014/09/01	07:50:43	mammal	golden taikn	1	33.6721	107.635	2088	2014-04-27	2014-09-19
101	CQ-20140427-77-0523	20140427-77	2014/09/02	12:03:49	mammal	golden taikn	1	33.6721	107.635	2088	2014-04-27	2014-09-19
102	CQ-20140427-77-0541	20140427-77	2014/09/07	10:19:41	mammal	golden taikn	1	33.6721	107.635	2088	2014-04-27	2014-09-19
103	CQ-20140427-77-0543	20140427-77	2014/09/19	08:44:43	mammal	golden taikn	1	33.6721	107.635	2088	2014-04-27	2014-09-19
104	CQ-20140427-77-0615	20140427-77	2014/09/19	14:11:58	mammal	golden taikn	1	33.6721	107.635	2088	2014-04-27	2014-09-19
105	CQ-20140427-78-0004	20140427-78	2014/4/27	15:56:14	mammal	golden taikn	1	33.6502	107.648	1985	2014-04-27	2014-09-20
106	CQ-20140427-78-0007	20140427-78	2014/04/30	11:18:24	mammal	golden taikn	1	33.6502	107.648	1985	2014-04-27	2014-09-20
107	CQ-20140427-78-0013	20140427-78	2014/04/30	16:23:20	mammal	golden taikn	1	33.6502	107.648	1985	2014-04-27	2014-09-20
108	CQ-20140427-78-0017	20140427-78	2014/04/30	19:40:39	mammal	golden taikn	1	33.6502	107.648	1985	2014-04-27	2014-09-20
109	CQ-20140427-78-0021	20140427-78	2014/05/05	11:40:57	mammal	golden taikn	1	33.6502	107.648	1985	2014-04-27	2014-09-20
110	CQ-20140427-78-0033	20140427-78	2014/05/18	07:19:02	mammal	golden taikn	1	33.6502	107.648	1985	2014-04-27	2014-09-20
111	CQ-20140427-78-0035	20140427-78	2014/05/20	15:17:34	mammal	golden taikn	1	33.6502	107.648	1985	2014-04-27	2014-09-20
112	CQ-20140427-78-0039	20140427-78	2014/05/21	12:49:02	mammal	golden taikn	1	33.6502	107.648	1985	2014-04-27	2014-09-20
113	CQ-20140427-78-0047	20140427-78	2014/05/25	11:24:33	mammal	golden taikn	1	33.6502	107.648	1985	2014-04-27	2014-09-20
114	CQ-20140427-78-0107	20140427-78	2014/08/25	15:52:49	mammal	golden taikn	1	33.6502	107.648	1985	2014-04-27	2014-09-20
115	CQ-20140427-78-0119	20140427-78	2014/08/27	16:03:36	mammal	golden taikn	1	33.6502	107.648	1985	2014-04-27	2014-09-20
116	CQ-20140427-78-0135	20140427-78	2014/08/27	20:42:02	mammal	golden taikn	1	33.6502	107.648	1985	2014-04-27	2014-09-20
117	CQ-20140427-78-0139	20140427-78	2014/08/28	08:14:26	mammal	golden taikn	1	33.6502	107.648	1985	2014-04-27	2014-09-20
118	CQ-20140427-78-0149	20140427-78	2014/08/28	13:56:37	mammal	golden taikn	1	33.6502	107.648	1985	2014-04-27	2014-09-20
119	CQ-20140427-78-0161	20140427-78	2014/09/02	08:11:58	mammal	golden taikn	1	33.6502	107.648	1985	2014-04-27	2014-09-20
120	CQ-20140427-78-0165	20140427-78	2014/09/06	13:28:14	mammal	golden taikn	1	33.6502	107.648	1985	2014-04-27	2014-09-20
121	CQ-20140427-78-0183	20140427-78	2014/09/10	14:09:36	mammal	golden taikn	1	33.6502	107.648	1985	2014-04-27	2014-09-20
122	CQ-20140427-78-0187	20140427-78	2014/09/11	07:00:45	mammal	golden taikn	1	33.6502	107.648	1985	2014-04-27	2014-09-20
123	CQ-20140427-78-0189	20140427-78	2014/09/13	10:49:22	mammal	golden taikn	3	33.6502	107.648	1985	2014-04-27	2014-09-20
124	CQ-20140427-93-0006	20140427-93	2014/04/29	06:22:51	mammal	golden taikn	1	33.666	107.655	2054	2014-04-27	2014-09-20
125	CQ-20140427-93-0008	20140427-93	2014/04/29	07:40:59	mammal	golden taikn	1	33.666	107.655	2054	2014-04-27	2014-09-20
126	CQ-20140427-93-0010	20140427-93	2014/04/29	11:09:14	mammal	golden taikn	1	33.666	107.655	2054	2014-04-27	2014-09-20
127	CQ-20140427-93-0014	20140427-93	2014/05/04	01:51:04	mammal	golden taikn	1	33.666	107.655	2054	2014-04-27	2014-09-20
128	CQ-20140427-93-0020	20140427-93	2014/05/04	03:36:05	mammal	golden taikn	1	33.666	107.655	2054	2014-04-27	2014-09-20
129	CQ-20140427-93-0032	20140427-93	2014/05/04	06:01:31	mammal	golden taikn	1	33.666	107.655	2054	2014-04-27	2014-09-20
130	CQ-20140427-93-0038	20140427-93	2014/05/07	12:12:52	mammal	golden taikn	1	33.666	107.655	2054	2014-04-27	2014-09-20
131	CQ-20140427-93-0040	20140427-93	2014/05/09	07:20:55	mammal	golden taikn	1	33.666	107.655	2054	2014-04-27	2014-09-20
132	CQ-20140427-93-0048	20140427-93	2014/05/14	17:07:15	mammal	golden taikn	1	33.666	107.655	2054	2014-04-27	2014-09-20
133	CQ-20140427-93-0072	20140427-93	2014/05/14	19:55:43	mammal	golden taikn	1	33.666	107.655	2054	2014-04-27	2014-09-20
134	CQ-20140427-93-0074	20140427-93	2014/05/17	16:44:40	mammal	golden taikn	1	33.666	107.655	2054	2014-04-27	2014-09-20
135	CQ-20140427-93-0088	20140427-93	2014/05/17	18:10:34	mammal	golden taikn	1	33.666	107.655	2054	2014-04-27	2014-09-20
136	CQ-20140427-93-0106	20140427-93	2014/05/18	00:56:25	mammal	golden taikn	1	33.666	107.655	2054	2014-04-27	2014-09-20
137	CQ-20140427-93-0110	20140427-93	2014/05/18	02:53:18	mammal	golden taikn	1	33.666	107.655	2054	2014-04-27	2014-09-20
138	CQ-20140427-93-0112	20140427-93	2014/05/18	06:57:56	mammal	golden taikn	1	33.666	107.655	2054	2014-04-27	2014-09-20
139	CQ-20140427-93-0118	20140427-93	2014/05/18	11:49:36	mammal	golden taikn	1	33.666	107.655	2054	2014-04-27	2014-09-20
140	CQ-20140427-93-0120	20140427-93	2014/05/19	12:13:55	mammal	golden taikn	1	33.666	107.655	2054	2014-04-27	2014-09-20
141	CQ-20140427-93-0122	20140427-93	2014/05/21	05:35:08	mammal	golden taikn	1	33.666	107.655	2054	2014-04-27	2014-09-20
142	CQ-20140427-93-0132	20140427-93	2014/05/22	09:35:33	mammal	golden taikn	1	33.666	107.655	2054	2014-04-27	2014-09-20
143	CQ-20140427-93-0138	20140427-93	2014/05/23	16:20:24	mammal	golden taikn	1	33.666	107.655	2054	2014-04-27	2014-09-20
144	CQ-20140427-93-0140	20140427-93	2014/05/24	06:31:01	mammal	golden taikn	1	33.666	107.655	2054	2014-04-27	2014-09-20
145	CQ-20140427-93-0150	20140427-93	2014/05/28	19:51:29	mammal	golden taikn	1	33.666	107.655	2054	2014-04-27	2014-09-20
146	CQ-20140427-93-0152	20140427-93	2014/05/28	23:51:59	mammal	golden taikn	1	33.666	107.655	2054	2014-04-27	2014-09-20
147	CQ-20140427-93-0156	20140427-93	2014/05/29	14:23:50	mammal	golden taikn	1	33.666	107.655	2054	2014-04-27	2014-09-20
148	CQ-20140427-93-0158	20140427-93	2014/05/29	19:29:14	mammal	golden taikn	1	33.666	107.655	2054	2014-04-27	2014-09-20
149	CQ-20140427-93-0164	20140427-93	2014/05/30	05:36:59	mammal	golden taikn	1	33.666	107.655	2054	2014-04-27	2014-09-20
150	CQ-20140427-93-0178	20140427-93	2014/06/03	11:51:35	mammal	golden taikn	1	33.666	107.655	2054	2014-04-27	2014-09-20
151	CQ-20140427-93-0184	20140427-93	2014/06/07	13:24:24	mammal	golden taikn	1	33.666	107.655	2054	2014-04-27	2014-09-20
152	CQ-20140427-93-0186	20140427-93	2014/06/08	19:06:55	mammal	golden taikn	1	33.666	107.655	2054	2014-04-27	2014-09-20
153	CQ-20140427-93-0188	20140427-93	2014/06/09	18:14:58	mammal	golden taikn	1	33.666	107.655	2054	2014-04-27	2014-09-20
154	CQ-20140427-93-0192	20140427-93	2014/06/12	06:56:59	mammal	golden taikn	1	33.666	107.655	2054	2014-04-27	2014-09-20
155	CQ-20140427-93-0194	20140427-93	2014/06/12	10:12:40	mammal	golden taikn	1	33.666	107.655	2054	2014-04-27	2014-09-20
156	CQ-20140427-93-0196	20140427-93	2014/06/12	14:58:48	mammal	golden taikn	1	33.666	107.655	2054	2014-04-27	2014-09-20
157	CQ-20140427-93-0198	20140427-93	2014/06/13	06:34:58	mammal	golden taikn	1	33.666	107.655	2054	2014-04-27	2014-09-20
158	CQ-20140427-93-0200	20140427-93	2014/06/14	10:54:09	mammal	golden taikn	1	33.666	107.655	2054	2014-04-27	2014-09-20
159	CQ-20140427-93-0204	20140427-93	2014/06/14	16:38:07	mammal	golden taikn	1	33.666	107.655	2054	2014-04-27	2014-09-20
160	CQ-20140427-93-0206	20140427-93	2014/06/15	06:36:20	mammal	golden taikn	1	33.666	107.655	2054	2014-04-27	2014-09-20
161	CQ-20140427-93-0208	20140427-93	2014/06/15	12:24:55	mammal	golden taikn	1	33.666	107.655	2054	2014-04-27	2014-09-20
162	CQ-20140427-93-0212	20140427-93	2014/06/15	15:56:30	mammal	golden taikn	1	33.666	107.655	2054	2014-04-27	2014-09-20
163	CQ-20140427-93-0226	20140427-93	2014/06/26	16:54:36	mammal	golden taikn	1	33.666	107.655	2054	2014-04-27	2014-09-20
164	CQ-20140427-93-0256	20140427-93	2014/06/26	20:12:53	mammal	golden taikn	1	33.666	107.655	2054	2014-04-27	2014-09-20
165	CQ-20140427-93-0278	20140427-93	2014/07/10	20:16:39	mammal	golden taikn	1	33.666	107.655	2054	2014-04-27	2014-09-20
166	CQ-20140427-93-0286	20140427-93	2014/07/10	21:32:03	mammal	golden taikn	2	33.666	107.655	2054	2014-04-27	2014-09-20
167	CQ-20140427-93-0459	20140427-93	2014/07/11	05:56:38	mammal	golden taikn	2	33.666	107.655	2054	2014-04-27	2014-09-20
168	CQ-20140427-93-0475	20140427-93	2014/07/12	19:19:00	mammal	golden taikn	1	33.666	107.655	2054	2014-04-27	2014-09-20
169	CQ-20140427-93-0487	20140427-93	2014/07/15	13:24:09	mammal	golden taikn	2	33.666	107.655	2054	2014-04-27	2014-09-20
170	CQ-20140427-93-0493	20140427-93	2014/07/17	18:26:23	mammal	golden taikn	1	33.666	107.655	2054	2014-04-27	2014-09-20
171	CQ-20140427-93-0499	20140427-93	2014/07/19	12:03:12	mammal	golden taikn	2	33.666	107.655	2054	2014-04-27	2014-09-20
172	CQ-20140427-93-0517	20140427-93	2014/07/25	14:25:02	mammal	golden taikn	1	33.666	107.655	2054	2014-04-27	2014-09-20
173	CQ-20140427-93-0525	20140427-93	2014/07/26	09:34:57	mammal	golden taikn	1	33.666	107.655	2054	2014-04-27	2014-09-20
174	CQ-20140427-93-0531	20140427-93	2014/08/08	10:50:30	mammal	golden taikn	1	33.666	107.655	2054	2014-04-27	2014-09-20
175	CQ-20140427-93-0537	20140427-93	2014/08/08	10:57:00	mammal	golden taikn	1	33.666	107.655	2054	2014-04-27	2014-09-20
176	CQ-20140427-93-0549	20140427-93	2014/08/17	18:14:51	mammal	golden taikn	1	33.666	107.655	2054	2014-04-27	2014-09-20
177	CQ-20140427-93-0573	20140427-93	2014/09/01	09:28:49	mammal	golden taikn	1	33.666	107.655	2054	2014-04-27	2014-09-20
178	CQ-20140427-93-0579	20140427-93	2014/09/14	18:46:59	mammal	golden taikn	1	33.666	107.655	2054	2014-04-27	2014-09-20
179	CQ-20140427-93-0583	20140427-93	2014/09/15	08:45:14	mammal	golden taikn	1	33.666	107.655	2054	2014-04-27	2014-09-20
180	CQ-20140427-93-0585	20140427-93	2014/09/16	10:06:31	mammal	golden taikn	1	33.666	107.655	2054	2014-04-27	2014-09-20
181	CQ-20140428-21-0019	20140428-21	2014/05/06	17:21:15	mammal	golden taikn	1	33.6316	107.702	1935	2014-04-28	2014/8/20
182	CQ-20140428-21-0021	20140428-21	2014/05/07	15:41:56	mammal	golden taikn	1	33.6316	107.702	1935	2014-04-28	2014/8/20
183	CQ-20140428-21-0027	20140428-21	2014/05/11	19:56:04	mammal	golden taikn	1	33.6316	107.702	1935	2014-04-28	2014/8/20
184	CQ-20140428-21-0029	20140428-21	2014/05/11	23:20:32	mammal	golden taikn	1	33.6316	107.702	1935	2014-04-28	2014/8/20
185	CQ-20140428-21-0033	20140428-21	2014/05/12	18:49:53	mammal	golden taikn	1	33.6316	107.702	1935	2014-04-28	2014/8/20
186	CQ-20140428-21-0175	20140428-21	2014/08/17	18:09:56	mammal	golden taikn	1	33.6316	107.702	1935	2014-04-28	2014/8/20
187	CQ-20140428-22-0043	20140428-22	2014/05/10	14:14:35	mammal	golden taikn	1	33.6273	107.686	1777	2014-04-28	2014/9/4
188	CQ-20140428-27-0007	20140428-27	2014/05/04	23:46:55	mammal	golden taikn	1	33.6107	107.658	1521	2014-04-28	2014/9/4
189	CQ-20140428-27-0011	20140428-27	2014/05/07	06:21:49	mammal	golden taikn	1	33.6107	107.658	1521	2014-04-28	2014/9/4
190	CQ-20140428-27-0029	20140428-27	2014/06/08	15:41:05	mammal	golden taikn	1	33.6107	107.658	1521	2014-04-28	2014/9/4
191	CQ-20140428-30-0245	20140428-30	2014/09/21	09:57:58	mammal	golden taikn	1	33.6106	107.665	1672	2014-04-28	2014-11-17
192	CQ-20140428-31-0265	20140428-31	2014/09/18	12:55:56	mammal	golden taikn	1	33.629	107.664	1801	2014-04-28	2014-11-17
193	CQ-20140428-31-0319	20140428-31	2014/10/11	13:03:26	mammal	golden taikn	1	33.629	107.664	1801	2014-04-28	2014-11-17
194	CQ-20140428-31-0323	20140428-31	2014/10/11	17:08:39	mammal	golden taikn	4	33.629	107.664	1801	2014-04-28	2014-11-17
195	CQ-20140428-31-0337	20140428-31	2014/10/16	09:52:41	mammal	golden taikn	1	33.629	107.664	1801	2014-04-28	2014-11-17
196	CQ-20140428-31-0343	20140428-31	2014/10/17	10:58:52	mammal	golden taikn	1	33.629	107.664	1801	2014-04-28	2014-11-17
197	CQ-20140428-31-0357	20140428-31	2014/10/17	18:19:31	mammal	golden taikn	1	33.629	107.664	1801	2014-04-28	2014-11-17
198	CQ-20140428-36-0243	20140428-36	2014/05/23	11:32:25	mammal	golden taikn	1	33.5658	107.702	1578	2014-04-28	2014/08/26
199	CQ-20140428-66-0006	20140428-66	2014/05/05	06:38:10	mammal	golden taikn	1	33.6273	107.599	1680	2014-04-28	2014-09-04
200	CQ-20140428-66-0118	20140428-66	2014/07/14	20:05:58	mammal	golden taikn	1	33.6273	107.599	1680	2014-04-28	2014-09-04
201	CQ-20140428-66-0124	20140428-66	2014/07/15	17:34:48	mammal	golden taikn	2	33.6273	107.599	1680	2014-04-28	2014-09-04
202	CQ-20140428-66-0164	20140428-66	2014/08/10	01:21:03	mammal	golden taikn	3	33.6273	107.599	1680	2014-04-28	2014-09-04
203	CQ-20140428-66-0178	20140428-66	2014/08/10	07:06:20	mammal	golden taikn	1	33.6273	107.599	1680	2014-04-28	2014-09-04
204	CQ-20140428-73-0011	20140428-73	2014/05/14	11:30:05	mammal	golden taikn	1	33.6337	107.614	2121	2014-04-28	2014-09-04
205	CQ-20140428-75-0085	20140428-75	2014/09/02	15:22:48	mammal	golden taikn	1	33.6342	107.619	2160	2014-04-28	2014-09-04
206	CQ-20140429-23-0287	20140429-23	2014/08/22	19:20:50	mammal	golden taikn	1	33.6294	107.713	1828	2014-04-29	2014-09-05
207	CQ-20140429-24-0001	20140429-24	2014/05/01	02:34:28	mammal	golden taikn	1	33.6278	107.713	1787	2014-04-29	2014/7/25
208	CQ-20140429-24-0003	20140429-24	2014/05/04	02:08:40	mammal	golden taikn	1	33.6278	107.713	1787	2014-04-29	2014/7/25
209	CQ-20140429-24-0015	20140429-24	2014/05/06	00:27:38	mammal	golden taikn	1	33.6278	107.713	1787	2014-04-29	2014/7/25
210	CQ-20140429-24-0025	20140429-24	2014/05/11	20:17:11	mammal	golden taikn	1	33.6278	107.713	1787	2014-04-29	2014/7/25
211	CQ-20140429-24-0027	20140429-24	2014/05/11	23:39:21	mammal	golden taikn	1	33.6278	107.713	1787	2014-04-29	2014/7/25
212	CQ-20140429-24-0039	20140429-24	2014/05/19	07:50:07	mammal	golden taikn	1	33.6278	107.713	1787	2014-04-29	2014/7/25
213	CQ-20140429-24-0180	20140429-24	2014/5/26	17:09:02	mammal	golden taikn	1	33.6278	107.713	1787	2014-04-29	2014/7/25
214	CQ-20140429-25-0049	20140429-25	2014/05/18	13:09:27	mammal	golden taikn	1	33.6084	107.712	1477	2014-04-29	2014/09/05
215	CQ-20140429-25-0253	20140429-25	2014/08/01	07:03:06	mammal	golden taikn	1	33.6084	107.712	1477	2014-04-29	2014/09/05
216	CQ-20140429-26-0095	20140429-26	2014/04/29	19:25:23	mammal	golden taikn	1	33.6401	107.669	2076	2014-04-29	2014-05-28
217	CQ-20140429-26-0973	20140429-26	2014/05/10	19:22:58	mammal	golden taikn	1	33.6401	107.669	2076	2014-04-29	2014-05-28
218	CQ-20140429-26-0981	20140429-26	2014/05/11	00:03:24	mammal	golden taikn	1	33.6401	107.669	2076	2014-04-29	2014-05-28
219	CQ-20140429-26-0987	20140429-26	2014/05/11	01:08:38	mammal	golden taikn	1	33.6401	107.669	2076	2014-04-29	2014-05-28
220	CQ-20140429-26-0989	20140429-26	2014/05/11	06:19:03	mammal	golden taikn	1	33.6401	107.669	2076	2014-04-29	2014-05-28
221	CQ-20140429-26-1143	20140429-26	2014/05/18	12:57:48	mammal	golden taikn	1	33.6401	107.669	2076	2014-04-29	2014-05-28
222	CQ-20140429-26-1525	20140429-26	2014/05/23	10:16:28	mammal	golden taikn	2	33.6401	107.669	2076	2014-04-29	2014-05-28
223	CQ-20140429-26-1536	20140429-26	2014/5/23	11:11:22	mammal	golden taikn	1	33.6401	107.669	2076	2014-04-29	2014-05-28
224	CQ-20140429-26-1547	20140429-26	2014/05/23	12:40:50	mammal	golden taikn	1	33.6401	107.669	2076	2014-04-29	2014-05-28
225	CQ-20140429-26-1558	20140429-26	2014/5/24	13:09:20	mammal	golden taikn	1	33.6401	107.669	2076	2014-04-29	2014-05-28
226	CQ-20140429-26-1559	20140429-26	2014/05/25	06:02:16	mammal	golden taikn	1	33.6401	107.669	2076	2014-04-29	2014-05-28
227	CQ-20140429-26-1561	20140429-26	2014/05/25	07:09:28	mammal	golden taikn	1	33.6401	107.669	2076	2014-04-29	2014-05-28
228	CQ-20140429-26-1566	20140429-26	2014/5/25	13:23:54	mammal	golden taikn	3	33.6401	107.669	2076	2014-04-29	2014-05-28
229	CQ-20140429-26-1567	20140429-26	2014/05/25	15:19:37	mammal	golden taikn	1	33.6401	107.669	2076	2014-04-29	2014-05-28
230	CQ-20140429-26-1687	20140429-26	2014/05/27	10:34:44	mammal	golden taikn	1	33.6401	107.669	2076	2014-04-29	2014-05-28
231	CQ-20140429-28-0049	20140429-28	2014/06/16	18:36:03	mammal	golden taikn	1	33.6178	107.638	1831	2014-04-29	2014/09/05
232	CQ-20140429-34-0013	20140429-34	2014/5/16	16:12:34	mammal	golden taikn	1	33.6333	107.664	1895	2014-04-29	2014-11-17
233	CQ-20140429-34-0014	20140429-34	2014/5/17	16:51:48	mammal	golden taikn	1	33.6333	107.664	1895	2014-04-29	2014-11-17
234	CQ-20140429-34-0024	20140429-34	2014/5/31	12:34:14	mammal	golden taikn	1	33.6333	107.664	1895	2014-04-29	2014-11-17
235	CQ-20140429-34-0073	20140429-34	2014/9/10	8:25:28	mammal	golden taikn	1	33.6333	107.664	1895	2014-04-29	2014-11-17
236	CQ-20140429-34-0075	20140429-34	2014/9/15	17:20:54	mammal	golden taikn	1	33.6333	107.664	1895	2014-04-29	2014-11-17
237	CQ-20140429-34-0076	20140429-34	2014/9/20	7:34:32	mammal	golden taikn	1	33.6333	107.664	1895	2014-04-29	2014-11-17
238	CQ-20140429-34-0086	20140429-34	2014/10/13	6:52:56	mammal	golden taikn	1	33.6333	107.664	1895	2014-04-29	2014-11-17
239	CQ-20140429-34-0119	20140429-34	2014/10/26	9:30:44	mammal	golden taikn	2	33.6333	107.664	1895	2014-04-29	2014-11-17
240	CQ-20140430-59-0020	20140430-59	2014/05/25	20:14:06	mammal	golden taikn	1	33.631	107.434	1966	2014-04-30	2014-09-03
241	CQ-20140430-59-0038	20140430-59	2014/06/09	19:24:06	mammal	golden taikn	1	33.631	107.434	1966	2014-04-30	2014-09-03
242	CQ-20140430-59-0040	20140430-59	2014/06/11	11:52:19	mammal	golden taikn	1	33.631	107.434	1966	2014-04-30	2014-09-03
243	CQ-20140430-59-0042	20140430-59	2014/06/16	08:49:29	mammal	golden taikn	1	33.631	107.434	1966	2014-04-30	2014-09-03
244	CQ-20140430-59-0046	20140430-59	2014/06/18	14:57:34	mammal	golden taikn	2	33.631	107.434	1966	2014-04-30	2014-09-03
245	CQ-20140430-59-0052	20140430-59	2014/06/21	11:41:35	mammal	golden taikn	1	33.631	107.434	1966	2014-04-30	2014-09-03
246	CQ-20140430-59-0054	20140430-59	2014/06/22	12:03:38	mammal	golden taikn	1	33.631	107.434	1966	2014-04-30	2014-09-03
247	CQ-20140430-59-0056	20140430-59	2014/06/25	20:51:50	mammal	golden taikn	1	33.631	107.434	1966	2014-04-30	2014-09-03
248	CQ-20140430-59-0058	20140430-59	2014/06/26	02:37:12	mammal	golden taikn	1	33.631	107.434	1966	2014-04-30	2014-09-03
249	CQ-20140430-59-0076	20140430-59	2014/06/26	04:01:19	mammal	golden taikn	1	33.631	107.434	1966	2014-04-30	2014-09-03
250	CQ-20140430-59-0084	20140430-59	2014/06/27	03:13:43	mammal	golden taikn	1	33.631	107.434	1966	2014-04-30	2014-09-03
251	CQ-20140430-59-0094	20140430-59	2014/07/16	07:35:00	mammal	golden taikn	1	33.631	107.434	1966	2014-04-30	2014-09-03
252	CQ-20140430-59-0096	20140430-59	2014/07/20	12:02:34	mammal	golden taikn	1	33.631	107.434	1966	2014-04-30	2014-09-03
253	CQ-20140430-59-0104	20140430-59	2014/07/24	19:57:49	mammal	golden taikn	1	33.631	107.434	1966	2014-04-30	2014-09-03
254	CQ-20140430-59-0112	20140430-59	2014/07/25	05:54:06	mammal	golden taikn	1	33.631	107.434	1966	2014-04-30	2014-09-03
255	CQ-20140430-59-0146	20140430-59	2014/08/20	19:01:06	mammal	golden taikn	1	33.631	107.434	1966	2014-04-30	2014-09-03
256	CQ-20140506-54-0023	20140506-54	2014/06/17	20:25:47	mammal	golden taikn	1	33.715	107.605	2897	2014-05-06	2014-08-15
257	CQ-20140506-54-0029	20140506-54	2014/06/17	22:18:00	mammal	golden taikn	4	33.715	107.605	2897	2014-05-06	2014-08-15
258	CQ-20140506-54-0031	20140506-54	2014/06/17	23:01:16	mammal	golden taikn	1	33.715	107.605	2897	2014-05-06	2014-08-15
259	CQ-20140506-54-0033	20140506-54	2014/06/17	23:47:46	mammal	golden taikn	2	33.715	107.605	2897	2014-05-06	2014-08-15
260	CQ-20140506-54-0035	20140506-54	2014/06/18	00:23:41	mammal	golden taikn	3	33.715	107.605	2897	2014-05-06	2014-08-15
261	CQ-20140506-54-0045	20140506-54	2014/06/18	01:33:33	mammal	golden taikn	2	33.715	107.605	2897	2014-05-06	2014-08-15
262	CQ-20140506-54-0057	20140506-54	2014/06/18	03:12:06	mammal	golden taikn	2	33.715	107.605	2897	2014-05-06	2014-08-15
263	CQ-20140506-54-0059	20140506-54	2014/06/18	04:42:03	mammal	golden taikn	2	33.715	107.605	2897	2014-05-06	2014-08-15
264	CQ-20140506-54-0061	20140506-54	2014/06/18	05:23:17	mammal	golden taikn	1	33.715	107.605	2897	2014-05-06	2014-08-15
265	CQ-20140506-54-0073	20140506-54	2014/06/27	19:30:39	mammal	golden taikn	1	33.715	107.605	2897	2014-05-06	2014-08-15
266	CQ-20140506-54-0077	20140506-54	2014/07/08	20:56:55	mammal	golden taikn	1	33.715	107.605	2897	2014-05-06	2014-08-15
267	CQ-20140506-54-0079	20140506-54	2014/07/10	11:36:15	mammal	golden taikn	1	33.715	107.605	2897	2014-05-06	2014-08-15
268	CQ-20140506-54-0117	20140506-54	2014/07/29	12:23:16	mammal	golden taikn	1	33.715	107.605	2897	2014-05-06	2014-08-15
269	CQ-20140506-56-0006	20140506-56	2014/5/7	17:01:46	mammal	golden taikn	1	33.6861	107.601	1991	2014-05-06	2014-06-03
270	CQ-20140506-56-0007	20140506-56	2014/5/9	15:58:56	mammal	golden taikn	1	33.6861	107.601	1991	2014-05-06	2014-06-03
271	CQ-20140506-56-0010	20140506-56	2014/5/22	23:44:14	mammal	golden taikn	1	33.6861	107.601	1991	2014-05-06	2014-06-03
272	CQ-20140506-79-0017	20140506-79	2014/05/31	18:02:40	mammal	golden taikn	1	33.6994	107.636	2614	2014-05-06	2014-08-22
273	CQ-20140506-79-0021	20140506-79	2014/06/04	17:25:42	mammal	golden taikn	1	33.6994	107.636	2614	2014-05-06	2014-08-22
274	CQ-20140506-79-0025	20140506-79	2014/06/06	05:24:08	mammal	golden taikn	1	33.6994	107.636	2614	2014-05-06	2014-08-22
275	CQ-20140506-79-0033	20140506-79	2014/06/10	16:37:40	mammal	golden taikn	1	33.6994	107.636	2614	2014-05-06	2014-08-22
276	CQ-20140506-79-0035	20140506-79	2014/06/15	08:34:46	mammal	golden taikn	1	33.6994	107.636	2614	2014-05-06	2014-08-22
277	CQ-20140506-79-0037	20140506-79	2014/06/23	16:30:58	mammal	golden taikn	1	33.6994	107.636	2614	2014-05-06	2014-08-22
278	CQ-20140506-79-0039	20140506-79	2014/06/25	07:20:44	mammal	golden taikn	1	33.6994	107.636	2614	2014-05-06	2014-08-22
279	CQ-20140506-79-0041	20140506-79	2014/06/25	08:33:49	mammal	golden taikn	1	33.6994	107.636	2614	2014-05-06	2014-08-22
280	CQ-20140506-79-0043	20140506-79	2014/06/25	14:42:13	mammal	golden taikn	2	33.6994	107.636	2614	2014-05-06	2014-08-22
281	CQ-20140506-79-0052	20140506-79	2014/6/27	1:40:34	mammal	golden taikn	1	33.6994	107.636	2614	2014-05-06	2014-08-22
282	CQ-20140506-79-0055	20140506-79	2014/06/27	15:16:22	mammal	golden taikn	1	33.6994	107.636	2614	2014-05-06	2014-08-22
283	CQ-20140506-79-0061	20140506-79	2014/06/27	15:53:09	mammal	golden taikn	1	33.6994	107.636	2614	2014-05-06	2014-08-22
284	CQ-20140506-79-0067	20140506-79	2014/06/27	17:35:34	mammal	golden taikn	1	33.6994	107.636	2614	2014-05-06	2014-08-22
285	CQ-20140506-79-0072	20140506-79	2014/7/1	1:44:32	mammal	golden taikn	1	33.6994	107.636	2614	2014-05-06	2014-08-22
286	CQ-20140506-79-0074	20140506-79	2014/7/1	5:17:52	mammal	golden taikn	1	33.6994	107.636	2614	2014-05-06	2014-08-22
287	CQ-20140506-79-0077	20140506-79	2014/07/01	06:51:13	mammal	golden taikn	1	33.6994	107.636	2614	2014-05-06	2014-08-22
288	CQ-20140506-79-0079	20140506-79	2014/07/01	07:55:36	mammal	golden taikn	1	33.6994	107.636	2614	2014-05-06	2014-08-22
289	CQ-20140506-79-0081	20140506-79	2014/07/03	19:17:31	mammal	golden taikn	1	33.6994	107.636	2614	2014-05-06	2014-08-22
290	CQ-20140506-79-0083	20140506-79	2014/07/04	05:07:33	mammal	golden taikn	1	33.6994	107.636	2614	2014-05-06	2014-08-22
291	CQ-20140506-79-0086	20140506-79	2014/7/4	8:30:52	mammal	golden taikn	1	33.6994	107.636	2614	2014-05-06	2014-08-22
292	CQ-20140506-79-0091	20140506-79	2014/07/06	10:26:57	mammal	golden taikn	1	33.6994	107.636	2614	2014-05-06	2014-08-22
293	CQ-20140506-79-0093	20140506-79	2014/07/07	20:19:19	mammal	golden taikn	1	33.6994	107.636	2614	2014-05-06	2014-08-22
294	CQ-20140506-88-0003	20140506-88	2014/05/07	23:41:07	mammal	golden taikn	1	33.7005	107.621	2052	2014-05-06	2014-08-20
295	CQ-20140506-88-0007	20140506-88	2014/05/11	19:39:21	mammal	golden taikn	1	33.7005	107.621	2052	2014-05-06	2014-08-20
296	CQ-20140506-88-0009	20140506-88	2014/05/18	02:44:19	mammal	golden taikn	1	33.7005	107.621	2052	2014-05-06	2014-08-20
297	CQ-20140506-88-0013	20140506-88	2014/05/19	18:30:50	mammal	golden taikn	1	33.7005	107.621	2052	2014-05-06	2014-08-20
298	CQ-20140506-88-0043	20140506-88	2014/08/17	01:53:36	mammal	golden taikn	1	33.7005	107.621	2052	2014-05-06	2014-08-20
299	CQ-20140506-95-0042	20140506-95	2014/5/30	11:08:20	mammal	golden taikn	1	33.7055	107.627	2305	2014-05-06	2014-08-19
300	CQ-20140506-95-0050	20140506-95	2014/6/4	16:53:04	mammal	golden taikn	1	33.7055	107.627	2305	2014-05-06	2014-08-19
301	CQ-20140506-95-0053	20140506-95	2014/06/05	06:30:47	mammal	golden taikn	1	33.7055	107.627	2305	2014-05-06	2014-08-19
302	CQ-20140506-95-0093	20140506-95	2014/07/03	18:28:23	mammal	golden taikn	1	33.7055	107.627	2305	2014-05-06	2014-08-19
303	CQ-20140506-95-0165	20140506-95	2014/08/13	21:39:06	mammal	golden taikn	1	33.7055	107.627	2305	2014-05-06	2014-08-19
304	CQ-20140506-95-0169	20140506-95	2014/08/14	18:23:05	mammal	golden taikn	1	33.7055	107.627	2305	2014-05-06	2014-08-19
305	CQ-20140506-95-0173	20140506-95	2014/08/16	11:56:32	mammal	golden taikn	1	33.7055	107.627	2305	2014-05-06	2014-08-19
306	CQ-20140506-95-0175	20140506-95	2014/08/16	13:54:14	mammal	golden taikn	1	33.7055	107.627	2305	2014-05-06	2014-08-19
307	CQ-20140506-96-0016	20140506-96	2014/05/09	16:35:16	mammal	golden taikn	1	33.691	107.598	2137	2014-05-06	2014-08-22
308	CQ-20140506-96-0018	20140506-96	2014/05/09	19:32:40	mammal	golden taikn	2	33.691	107.598	2137	2014-05-06	2014-08-22
309	CQ-20140506-96-0021	20140506-96	2014/5/10	9:09:22	mammal	golden taikn	1	33.691	107.598	2137	2014-05-06	2014-08-22
310	CQ-20140506-96-0022	20140506-96	2014/05/13	15:32:10	mammal	golden taikn	1	33.691	107.598	2137	2014-05-06	2014-08-22
311	CQ-20140506-96-0024	20140506-96	2014/05/14	14:55:47	mammal	golden taikn	1	33.691	107.598	2137	2014-05-06	2014-08-22
312	CQ-20140506-96-0040	20140506-96	2014/05/14	15:37:40	mammal	golden taikn	4	33.691	107.598	2137	2014-05-06	2014-08-22
313	CQ-20140506-96-0061	20140506-96	2014/5/14	16:06:38	mammal	golden taikn	1	33.691	107.598	2137	2014-05-06	2014-08-22
314	CQ-20140506-96-0064	20140506-96	2014/05/16	17:29:11	mammal	golden taikn	1	33.691	107.598	2137	2014-05-06	2014-08-22
315	CQ-20140506-96-0068	20140506-96	2014/05/16	18:14:24	mammal	golden taikn	1	33.691	107.598	2137	2014-05-06	2014-08-22
316	CQ-20140506-96-0071	20140506-96	2014/5/17	6:43:50	mammal	golden taikn	1	33.691	107.598	2137	2014-05-06	2014-08-22
317	CQ-20140506-96-0074	20140506-96	2014/05/17	17:59:47	mammal	golden taikn	1	33.691	107.598	2137	2014-05-06	2014-08-22
318	CQ-20140506-96-0076	20140506-96	2014/05/18	06:00:48	mammal	golden taikn	1	33.691	107.598	2137	2014-05-06	2014-08-22
319	CQ-20140506-96-0078	20140506-96	2014/05/19	02:11:04	mammal	golden taikn	1	33.691	107.598	2137	2014-05-06	2014-08-22
320	CQ-20140506-96-0080	20140506-96	2014/05/20	12:27:36	mammal	golden taikn	1	33.691	107.598	2137	2014-05-06	2014-08-22
321	CQ-20140506-96-0100	20140506-96	2014/06/16	07:32:59	mammal	golden taikn	1	33.691	107.598	2137	2014-05-06	2014-08-22
322	CQ-20140506-96-0156	20140506-96	2014/07/23	20:21:15	mammal	golden taikn	1	33.691	107.598	2137	2014-05-06	2014-08-22
323	CQ-20140506-96-0158	20140506-96	2014/07/25	08:47:24	mammal	golden taikn	1	33.691	107.598	2137	2014-05-06	2014-08-22
324	CQ-20140506-96-0160	20140506-96	2014/07/25	16:38:08	mammal	golden taikn	1	33.691	107.598	2137	2014-05-06	2014-08-22
325	CQ-20140506-96-0184	20140506-96	2014/08/17	06:30:22	mammal	golden taikn	1	33.691	107.598	2137	2014-05-06	2014-08-22
326	CQ-20140506-99-0069	20140506-99	2014/06/08	05:32:03	mammal	golden taikn	1	33.7066	107.637	2587	2014-05-06	2014-07-07
327	CQ-20140506-99-0073	20140506-99	2014/06/11	09:25:40	mammal	golden taikn	1	33.7066	107.637	2587	2014-05-06	2014-07-07
328	CQ-20140506-99-0083	20140506-99	2014/06/11	10:32:50	mammal	golden taikn	1	33.7066	107.637	2587	2014-05-06	2014-07-07
329	CQ-20140506-99-0161	20140506-99	2014/06/24	07:08:52	mammal	golden taikn	1	33.7066	107.637	2587	2014-05-06	2014-07-07
330	CQ-20140506-99-0167	20140506-99	2014/06/30	13:55:17	mammal	golden taikn	2	33.7066	107.637	2587	2014-05-06	2014-07-07
331	CQ-20140506-99-0175	20140506-99	2014/06/30	15:28:43	mammal	golden taikn	2	33.7066	107.637	2587	2014-05-06	2014-07-07
332	CQ-20140506-99-0193	20140506-99	2014/07/04	15:38:06	mammal	golden taikn	1	33.7066	107.637	2587	2014-05-06	2014-07-07
333	CQ-20140506-99-0197	20140506-99	2014/07/07	12:00:18	mammal	golden taikn	1	33.7066	107.637	2587	2014-05-06	2014-07-07
334	CQ-20140818-65-0013	20140818-65	2014/09/25	08:02:53	mammal	golden taikn	1	33.5993	107.606	1545	2014-08-18	2014-11-16
335	CQ-20140818-68-0011	20140818-68	2014/10/15	16:57:29	mammal	golden taikn	1	33.6812	107.545	1894	2014-08-18	2015-04-12
336	CQ-20140818-68-0039	20140818-68	2015/03/26	15:07:25	mammal	golden taikn	1	33.6812	107.545	1894	2014-08-18	2015-04-12
337	CQ-20140818-68-0040	20140818-68	2015/03/27	01:46:06	mammal	golden taikn	1	33.6812	107.545	1894	2014-08-18	2015-04-12
338	CQ-20140818-68-0041	20140818-68	2015/03/27	02:27:55	mammal	golden taikn	1	33.6812	107.545	1894	2014-08-18	2015-04-12
339	CQ-20140818-68-0047	20140818-68	2015/04/06	22:39:45	mammal	golden taikn	1	33.6812	107.545	1894	2014-08-18	2015-04-12
340	CQ-20140818-81-0063	20140818-81	2014/9/18	18:46:48	mammal	golden taikn	1	33.6496	107.588	1526	2014-08-18	2015-03-29
341	CQ-20140818-81-0064	20140818-81	2014/9/19	3:55:24	mammal	golden taikn	1	33.6496	107.588	1526	2014-08-18	2015-03-29
342	CQ-20140818-81-0091	20140818-81	2014/10/10	3:12:28	mammal	golden taikn	1	33.6496	107.588	1526	2014-08-18	2015-03-29
343	CQ-20140818-81-0107	20140818-81	2014/10/24	21:36:48	mammal	golden taikn	1	33.6496	107.588	1526	2014-08-18	2015-03-29
344	CQ-20140818-81-0126	20140818-81	2014/11/3	21:47:38	mammal	golden taikn	1	33.6496	107.588	1526	2014-08-18	2015-03-29
345	CQ-20140818-81-0131	20140818-81	2014/11/9	4:13:48	mammal	golden taikn	1	33.6496	107.588	1526	2014-08-18	2015-03-29
346	CQ-20140818-81-0134	20140818-81	2014/11/12	0:21:08	mammal	golden taikn	1	33.6496	107.588	1526	2014-08-18	2015-03-29
347	CQ-20140818-81-0145	20140818-81	2014/12/27	10:15:18	mammal	golden taikn	1	33.6496	107.588	1526	2014-08-18	2015-03-29
348	CQ-20140818-81-0150	20140818-81	2014/12/27	11:13:25	mammal	golden taikn	1	33.6496	107.588	1526	2014-08-18	2015-03-29
349	CQ-20140818-81-0152	20140818-81	2014/12/27	11:47:25	mammal	golden taikn	1	33.6496	107.588	1526	2014-08-18	2015-03-29
350	CQ-20140818-81-0154	20140818-81	2014/12/28	13:11:07	mammal	golden taikn	1	33.6496	107.588	1526	2014-08-18	2015-03-29
351	CQ-20140818-81-0161	20140818-81	2014/12/29	12:00:30	mammal	golden taikn	1	33.6496	107.588	1526	2014-08-18	2015-03-29
352	CQ-20140818-81-0184	20140818-81	2014/12/29	12:40:04	mammal	golden taikn	1	33.6496	107.588	1526	2014-08-18	2015-03-29
353	CQ-20140818-81-0203	20140818-81	2014/12/29	13:28:22	mammal	golden taikn	1	33.6496	107.588	1526	2014-08-18	2015-03-29
354	CQ-20140818-81-0235	20140818-81	2014/12/29	14:15:32	mammal	golden taikn	1	33.6496	107.588	1526	2014-08-18	2015-03-29
355	CQ-20140818-81-0262	20140818-81	2015/01/02	15:16:12	mammal	golden taikn	1	33.6496	107.588	1526	2014-08-18	2015-03-29
356	CQ-20140818-81-0311	20140818-81	2015/2/21	14:05:22	mammal	golden taikn	1	33.6496	107.588	1526	2014-08-18	2015-03-29
357	CQ-20140818-81-0312	20140818-81	2015/02/13	00:04:29	mammal	golden taikn	1	33.6496	107.588	1526	2014-08-18	2015-03-29
358	CQ-20140818-81-0314	20140818-81	2015/02/14	10:47:39	mammal	golden taikn	1	33.6496	107.588	1526	2014-08-18	2015-03-29
359	CQ-20140818-83-0025	20140818-83	2014/10/19	18:03:48	mammal	golden taikn	1	33.6733	107.539	1791	2014-08-18	2015-04-12
360	CQ-20140818-83-0046	20140818-83	2015/2/19	0:12:56	mammal	golden taikn	1	33.6733	107.539	1791	2014-08-18	2015-04-12
361	CQ-20140818-83-0047	20140818-83	2015/2/19	7:15:32	mammal	golden taikn	1	33.6733	107.539	1791	2014-08-18	2015-04-12
362	CQ-20140818-91-0123	20140818-91	2014/11/14	2:48:26	mammal	golden taikn	1	33.6698	107.581	1571	2014-08-18	2015-04-12
363	CQ-20140818-91-0124	20140818-91	2014/11/14	7:01:52	mammal	golden taikn	1	33.6698	107.581	1571	2014-08-18	2015-04-12
364	CQ-20140819-100-0081	20140819-100	2014/10/17	16:47:42	mammal	golden taikn	1	33.655	107.617	1709	2014-08-19	2015-04-23
365	CQ-20140819-100-0083	20140819-100	2014/10/18	8:49:38	mammal	golden taikn	1	33.655	107.617	1709	2014-08-19	2015-04-23
366	CQ-20140819-100-0233	20140819-100	2015/04/21	01:10:51	mammal	golden taikn	1	33.655	107.617	1709	2014-08-19	2015-04-23
367	CQ-20140819-54-0016	20140819-54	2014/11/21	14:42:48	mammal	golden taikn	1	33.7111	107.604	2697	2014-08-19	2015-04-09
368	CQ-20140819-54-0019	20140819-54	2015/1/19	15:32:36	mammal	golden taikn	1	33.7111	107.604	2697	2014-08-19	2015-04-09
369	CQ-20140820-03-0057	20140820-03	2014/09/24	16:22:55	mammal	golden taikn	1	33.4662	107.737	1433	2014-08-20	2014-10-24
370	CQ-20140820-03-0063	20140820-03	2014/09/26	03:02:40	mammal	golden taikn	1	33.4662	107.737	1433	2014-08-20	2014-10-24
371	CQ-20140820-03-0097	20140820-03	2014/10/17	18:17:38	mammal	golden taikn	1	33.4662	107.737	1433	2014-08-20	2014-10-24
372	CQ-20140820-03-0100	20140820-03	2014/10/19	16:32:29	mammal	golden taikn	1	33.4662	107.737	1433	2014-08-20	2014-10-24
373	CQ-20140820-37-0684	20140820-37	2014/09/22	15:54:47	mammal	golden taikn	1	33.4982	107.713	1206	2014-08-20	2014-11-03
374	CQ-20140820-84-0023	20140820-84	2014/10/14	11:57:57	mammal	golden taikn	3	33.687	107.566	1820	2014-08-20	2015-04-12
375	CQ-20140820-84-0025	20140820-84	2014/10/21	08:31:51	mammal	golden taikn	1	33.687	107.566	1820	2014-08-20	2015-04-12
376	CQ-20140820-84-0028	20140820-84	2014/10/21	15:43:22	mammal	golden taikn	1	33.687	107.566	1820	2014-08-20	2015-04-12
377	CQ-20140820-84-0030	20140820-84	2014/10/21	16:36:50	mammal	golden taikn	1	33.687	107.566	1820	2014-08-20	2015-04-12
378	CQ-20140820-84-0045	20140820-84	2014/12/07	01:56:26	mammal	golden taikn	1	33.687	107.566	1820	2014-08-20	2015-04-12
379	CQ-20140820-84-0112	20140820-84	2015/04/05	19:03:47	mammal	golden taikn	2	33.687	107.566	1820	2014-08-20	2015-04-12
380	CQ-20140820-84-0113	20140820-84	2015/04/07	18:02:42	mammal	golden taikn	9	33.687	107.566	1820	2014-08-20	2015-04-12
381	CQ-20140820-88-0009	20140820-88	2014/09/07	14:04:08	mammal	golden taikn	1	33.6949	107.616	2170	2014-08-20	2015-04-14
382	CQ-20140820-88-0019	20140820-88	2014/09/12	13:03:16	mammal	golden taikn	1	33.6949	107.616	2170	2014-08-20	2015-04-14
383	CQ-20140820-88-0025	20140820-88	2014/10/02	18:42:18	mammal	golden taikn	1	33.6949	107.616	2170	2014-08-20	2015-04-14
384	CQ-20140820-88-0026	20140820-88	2014/10/09	18:42:19	mammal	golden taikn	1	33.6949	107.616	2170	2014-08-20	2015-04-14
385	CQ-20140820-88-0033	20140820-88	2014/11/2	09:47:57	mammal	golden taikn	1	33.6949	107.616	2170	2014-08-20	2015-04-14
386	CQ-20140820-88-0034	20140820-88	2014/11/03	9:48:22	mammal	golden taikn	1	33.6949	107.616	2170	2014-08-20	2015-04-14
387	CQ-20140820-88-0051	20140820-88	2014/12/23	15:54:32	mammal	golden taikn	1	33.6949	107.616	2170	2014-08-20	2015-04-14
388	CQ-20140820-88-0090	20140820-88	2015/03/29	01:52:07	mammal	golden taikn	1	33.6949	107.616	2170	2014-08-20	2015-04-14
389	CQ-20140820-94-0053	20140820-94	2014/09/22	15:10:42	mammal	golden taikn	1	33.6725	107.565	1596	2014-08-20	2015-04-12
390	CQ-20140820-94-0054	20140820-94	2014/09/23	15:11:40	mammal	golden taikn	1	33.6725	107.565	1596	2014-08-20	2015-04-12
391	CQ-20140820-94-0099	20140820-94	2014/10/23	01:04:17	mammal	golden taikn	1	33.6725	107.565	1596	2014-08-20	2015-04-12
392	CQ-20140820-94-0101	20140820-94	2014/10/25	15:54:55	mammal	golden taikn	1	33.6725	107.565	1596	2014-08-20	2015-04-12
393	CQ-20140820-94-0105	20140820-94	2014/11/05	00:25:53	mammal	golden taikn	1	33.6725	107.565	1596	2014-08-20	2015-04-12
394	CQ-20140820-94-0109	20140820-94	2014/11/09	01:46:54	mammal	golden taikn	1	33.6725	107.565	1596	2014-08-20	2015-04-12
395	CQ-20140820-94-0111	20140820-94	2014/11/09	07:38:10	mammal	golden taikn	1	33.6725	107.565	1596	2014-08-20	2015-04-12
396	CQ-20140820-94-0113	20140820-94	2014/11/9	8:58:08	mammal	golden taikn	1	33.6725	107.565	1596	2014-08-20	2015-04-12
397	CQ-20140820-94-0121	20140820-94	2014/11/15	12:09:42	mammal	golden taikn	1	33.6725	107.565	1596	2014-08-20	2015-04-12
398	CQ-20140820-94-0135	20140820-94	2014/11/17	23:46:04	mammal	golden taikn	1	33.6725	107.565	1596	2014-08-20	2015-04-12
399	CQ-20140820-94-0136	20140820-94	2014/12/07	13:37:26	mammal	golden taikn	1	33.6725	107.565	1596	2014-08-20	2015-04-12
400	CQ-20140820-94-0137	20140820-94	2014/12/07	16:04:18	mammal	golden taikn	1	33.6725	107.565	1596	2014-08-20	2015-04-12
401	CQ-20140820-95-0005	20140820-95	2014/08/22	10:17:00	mammal	golden taikn	1	33.7125	107.631	2446	2014-08-20	2015-04-14
402	CQ-20140820-95-0010	20140820-95	2014/08/26	17:09:45	mammal	golden taikn	1	33.7125	107.631	2446	2014-08-20	2015-04-14
403	CQ-20140820-95-0021	20140820-95	2014/09/06	08:02:02	mammal	golden taikn	1	33.7125	107.631	2446	2014-08-20	2015-04-14
404	CQ-20140820-95-0025	20140820-95	2014/09/14	08:17:33	mammal	golden taikn	1	33.7125	107.631	2446	2014-08-20	2015-04-14
405	CQ-20140820-95-0036	20140820-95	2014/09/17	17:06:33	mammal	golden taikn	2	33.7125	107.631	2446	2014-08-20	2015-04-14
406	CQ-20140820-95-0037	20140820-95	2014/9/14	8:55:46	mammal	golden taikn	1	33.7125	107.631	2446	2014-08-20	2015-04-14
407	CQ-20140820-95-0038	20140820-95	2014/9/17	17:06:58	mammal	golden taikn	1	33.7125	107.631	2446	2014-08-20	2015-04-14
408	CQ-20140820-95-0045	20140820-95	2014/09/18	04:15:49	mammal	golden taikn	1	33.7125	107.631	2446	2014-08-20	2015-04-14
409	CQ-20140820-95-0049	20140820-95	2014/09/18	04:52:11	mammal	golden taikn	1	33.7125	107.631	2446	2014-08-20	2015-04-14
410	CQ-20140820-95-0075	20140820-95	2014/09/18	06:57:54	mammal	golden taikn	1	33.7125	107.631	2446	2014-08-20	2015-04-14
411	CQ-20140820-95-0081	20140820-95	2014/09/18	08:48:59	mammal	golden taikn	1	33.7125	107.631	2446	2014-08-20	2015-04-14
412	CQ-20140820-95-0113	20140820-95	2014/09/19	09:40:49	mammal	golden taikn	1	33.7125	107.631	2446	2014-08-20	2015-04-14
413	CQ-20140820-95-0123	20140820-95	2014/9/19	18:57:04	mammal	golden taikn	1	33.7125	107.631	2446	2014-08-20	2015-04-14
414	CQ-20140820-95-0129	20140820-95	2014/09/19	10:13:12	mammal	golden taikn	1	33.7125	107.631	2446	2014-08-20	2015-04-14
415	CQ-20140820-95-0131	20140820-95	2014/09/19	16:37:09	mammal	golden taikn	1	33.7125	107.631	2446	2014-08-20	2015-04-14
416	CQ-20140820-95-0134	20140820-95	2014/09/19	18:56:39	mammal	golden taikn	1	33.7125	107.631	2446	2014-08-20	2015-04-14
417	CQ-20140820-95-0137	20140820-95	2014/09/20	14:41:54	mammal	golden taikn	1	33.7125	107.631	2446	2014-08-20	2015-04-14
418	CQ-20140820-95-0141	20140820-95	2014/09/20	15:42:36	mammal	golden taikn	1	33.7125	107.631	2446	2014-08-20	2015-04-14
419	CQ-20140820-95-0143	20140820-95	2014/09/24	10:59:45	mammal	golden taikn	1	33.7125	107.631	2446	2014-08-20	2015-04-14
420	CQ-20140820-95-0169	20140820-95	2014/10/25	8:51:36	mammal	golden taikn	1	33.7125	107.631	2446	2014-08-20	2015-04-14
421	CQ-20140820-95-0177	20140820-95	2014/11/10	14:53:52	mammal	golden taikn	1	33.7125	107.631	2446	2014-08-20	2015-04-14
422	CQ-20140820-95-0189	20140820-95	2014/11/25	07:31:25	mammal	golden taikn	1	33.7125	107.631	2446	2014-08-20	2015-04-14
423	CQ-20140820-95-0209	20140820-95	2015/1/31	16:46:42	mammal	golden taikn	1	33.7125	107.631	2446	2014-08-20	2015-04-14
424	CQ-20140820-95-0217	20140820-95	2015/02/15	13:58:50	mammal	golden taikn	1	33.7125	107.631	2446	2014-08-20	2015-04-14
425	CQ-20140820-95-0221	20140820-95	2015/3/1	16:10:56	mammal	golden taikn	1	33.7125	107.631	2446	2014-08-20	2015-04-14
426	CQ-20140820-95-0241	20140820-95	2015/03/24	17:15:09	mammal	golden taikn	1	33.7125	107.631	2446	2014-08-20	2015-04-14
427	CQ-20140820-99-0009	20140820-99	2014/08/25	18:11:00	mammal	golden taikn	1	33.703	107.644	2508	2014-08-20	2015-04-14
428	CQ-20140820-99-0045	20140820-99	2014/12/06	17:16:06	mammal	golden taikn	1	33.703	107.644	2508	2014-08-20	2015-04-14
429	CQ-20140820-99-0047	20140820-99	2014/12/08	15:17:35	mammal	golden taikn	1	33.703	107.644	2508	2014-08-20	2015-04-14
430	CQ-20140820-99-0053	20140820-99	2014/12/24	12:52:12	mammal	golden taikn	1	33.703	107.644	2508	2014-08-20	2015-04-14
431	CQ-20140820-99-0059	20140820-99	2014/12/28	15:50:25	mammal	golden taikn	1	33.703	107.644	2508	2014-08-20	2015-04-14
432	CQ-20140820-99-0063	20140820-99	2014/12/29	14:45:10	mammal	golden taikn	1	33.703	107.644	2508	2014-08-20	2015-04-14
433	CQ-20140820-99-0065	20140820-99	2014/12/31	16:27:30	mammal	golden taikn	1	33.703	107.644	2508	2014-08-20	2015-04-14
434	CQ-20140820-99-0067	20140820-99	2015/01/09	17:52:08	mammal	golden taikn	1	33.703	107.644	2508	2014-08-20	2015-04-14
435	CQ-20140820-99-0069	20140820-99	2015/01/10	10:40:53	mammal	golden taikn	1	33.703	107.644	2508	2014-08-20	2015-04-14
436	CQ-20140820-99-0073	20140820-99	2015/1/24	12:18:48	mammal	golden taikn	1	33.703	107.644	2508	2014-08-20	2015-04-14
437	CQ-20140820-99-0075	20140820-99	2015/01/24	13:07:34	mammal	golden taikn	1	33.703	107.644	2508	2014-08-20	2015-04-14
438	CQ-20140820-99-0077	20140820-99	2015/01/24	18:20:41	mammal	golden taikn	1	33.703	107.644	2508	2014-08-20	2015-04-14
439	CQ-20140820-99-0079	20140820-99	2015/1/29	14:03:58	mammal	golden taikn	1	33.703	107.644	2508	2014-08-20	2015-04-14
440	CQ-20140820-99-0081	20140820-99	2015/01/30	17:11:57	mammal	golden taikn	1	33.703	107.644	2508	2014-08-20	2015-04-14
441	CQ-20140820-99-0083	20140820-99	2015/02/01	12:52:30	mammal	golden taikn	1	33.703	107.644	2508	2014-08-20	2015-04-14
442	CQ-20140820-99-0087	20140820-99	2015/02/05	17:11:17	mammal	golden taikn	1	33.703	107.644	2508	2014-08-20	2015-04-14
443	CQ-20140820-99-0092	20140820-99	2015/2/18	17:56:22	mammal	golden taikn	1	33.703	107.644	2508	2014-08-20	2015-04-14
444	CQ-20140820-99-0095	20140820-99	2015/3/4	11:08:22	mammal	golden taikn	1	33.703	107.644	2508	2014-08-20	2015-04-14
445	CQ-20140821-07-0123	20140821-07	2014/10/31	18:22:59	mammal	golden taikn	1	33.6059	107.687	1432	2014-08-21	2014-11-06
446	CQ-20140821-07-0127	20140821-07	2014/11/01	06:36:24	mammal	golden taikn	1	33.6059	107.687	1432	2014-08-21	2014-11-06
447	CQ-20140821-09-0007	20140821-09	2014/09/01	14:39:36	mammal	golden taikn	1	33.5316	107.634	1575	2014-08-21	2015-04-23
448	CQ-20140821-09-0011	20140821-09	2014/09/01	15:36:46	mammal	golden taikn	1	33.5316	107.634	1575	2014-08-21	2015-04-23
449	CQ-20140821-09-0151	20140821-09	2014/12/10	07:29:06	mammal	golden taikn	1	33.5316	107.634	1575	2014-08-21	2015-04-23
450	CQ-20140821-09-0163	20140821-09	2014/12/17	15:38:07	mammal	golden taikn	5	33.5316	107.634	1575	2014-08-21	2015-04-23
451	CQ-20140821-09-0167	20140821-09	2014/12/18	12:53:08	mammal	golden taikn	1	33.5316	107.634	1575	2014-08-21	2015-04-23
452	CQ-20140821-09-0209	20140821-09	2015/02/25	15:46:47	mammal	golden taikn	2	33.5316	107.634	1575	2014-08-21	2015-04-23
453	CQ-20140821-09-0215	20140821-09	2015/02/27	08:57:03	mammal	golden taikn	1	33.5316	107.634	1575	2014-08-21	2015-04-23
454	CQ-20140821-09-0217	20140821-09	2015/02/27	09:49:04	mammal	golden taikn	1	33.5316	107.634	1575	2014-08-21	2015-04-23
455	CQ-20140821-09-0259	20140821-09	2015/03/19	12:15:41	mammal	golden taikn	1	33.5316	107.634	1575	2014-08-21	2015-04-23
456	CQ-20140821-86-0015	20140821-86	2014/09/18	07:30:51	mammal	golden taikn	1	33.686	107.608	2030	2014-08-21	2015-04-27
457	CQ-20140821-86-0050	20140821-86	2014/10/17	12:02:04	mammal	golden taikn	1	33.686	107.608	2030	2014-08-21	2015-04-27
458	CQ-20140821-86-0077	20140821-86	2014/11/20	1:32:52	mammal	golden taikn	1	33.686	107.608	2030	2014-08-21	2015-04-27
459	CQ-20140821-86-0078	20140821-86	2014/11/26	08:42:36	mammal	golden taikn	1	33.686	107.608	2030	2014-08-21	2015-04-27
460	CQ-20140821-86-0095	20140821-86	2015/04/02	08:39:38	mammal	golden taikn	1	33.686	107.608	2030	2014-08-21	2015-04-27
461	CQ-20140822-56-0015	20140822-56	2014/10/08	16:13:32	mammal	golden taikn	1	33.6788	107.595	1836	2014-08-22	2015-04-27
462	CQ-20140822-56-0018	20140822-56	2014/10/14	08:03:32	mammal	golden taikn	1	33.6788	107.595	1836	2014-08-22	2015-04-27
463	CQ-20140822-56-0019	20140822-56	2014/10/15	00:03:11	mammal	golden taikn	1	33.6788	107.595	1836	2014-08-22	2015-04-27
464	CQ-20140822-56-0024	20140822-56	2014/11/01	10:00:43	mammal	golden taikn	1	33.6788	107.595	1836	2014-08-22	2015-04-27
465	CQ-20140822-56-0032	20140822-56	2014/11/08	17:52:44	mammal	golden taikn	1	33.6788	107.595	1836	2014-08-22	2015-04-27
466	CQ-20140822-56-0035	20140822-56	2014/11/24	10:06:15	mammal	golden taikn	1	33.6788	107.595	1836	2014-08-22	2015-04-27
467	CQ-20140822-56-0036	20140822-56	2014/11/27	07:18:56	mammal	golden taikn	1	33.6788	107.595	1836	2014-08-22	2015-04-27
468	CQ-20140822-56-0118	20140822-56	2015/04/04	00:18:02	mammal	golden taikn	1	33.6788	107.595	1836	2014-08-22	2015-04-27
469	CQ-20140822-56-0119	20140822-56	2015/04/05	05:55:59	mammal	golden taikn	1	33.6788	107.595	1836	2014-08-22	2015-04-27
470	CQ-20140822-56-0120	20140822-56	2015/04/05	19:10:44	mammal	golden taikn	1	33.6788	107.595	1836	2014-08-22	2015-04-27
471	CQ-20140822-56-0121	20140822-56	2015/04/06	07:53:53	mammal	golden taikn	1	33.6788	107.595	1836	2014-08-22	2015-04-27
472	CQ-20140822-56-0122	20140822-56	2015/04/07	06:04:48	mammal	golden taikn	1	33.6788	107.595	1836	2014-08-22	2015-04-27
473	CQ-20140822-56-0124	20140822-56	2015/04/14	15:00:59	mammal	golden taikn	1	33.6788	107.595	1836	2014-08-22	2015-04-27
474	CQ-20140822-56-0128	20140822-56	2015/04/14	15:47:24	mammal	golden taikn	1	33.6788	107.595	1836	2014-08-22	2015-04-27
475	CQ-20140822-79-0005	20140822-79	2014/08/25	01:46:46	mammal	golden taikn	1	33.693	107.631	2347	2014-08-22	2015-04-14
476	CQ-20140822-79-0021	20140822-79	2014/09/09	13:28:02	mammal	golden taikn	1	33.693	107.631	2347	2014-08-22	2015-04-14
477	CQ-20140822-79-0023	20140822-79	2014/09/11	15:48:53	mammal	golden taikn	1	33.693	107.631	2347	2014-08-22	2015-04-14
478	CQ-20140822-79-0026	20140822-79	2014/9/14	18:57:22	mammal	golden taikn	3	33.693	107.631	2347	2014-08-22	2015-04-14
479	CQ-20140822-79-0031	20140822-79	2014/10/13	15:44:22	mammal	golden taikn	1	33.693	107.631	2347	2014-08-22	2015-04-14
480	CQ-20140822-79-0037	20140822-79	2014/12/6	18:25:56	mammal	golden taikn	1	33.693	107.631	2347	2014-08-22	2015-04-14
481	CQ-20140822-79-0039	20140822-79	2014/11/02	22:20:39	mammal	golden taikn	1	33.693	107.631	2347	2014-08-22	2015-04-14
482	CQ-20140822-79-0045	20140822-79	2014/11/11	13:38:32	mammal	golden taikn	1	33.693	107.631	2347	2014-08-22	2015-04-14
483	CQ-20140822-79-0046	20140822-79	2014/12/06	18:25:29	mammal	golden taikn	1	33.693	107.631	2347	2014-08-22	2015-04-14
484	CQ-20140822-79-0047	20140822-79	2014/12/06	23:16:46	mammal	golden taikn	1	33.693	107.631	2347	2014-08-22	2015-04-14
485	CQ-20140822-79-0049	20140822-79	2014/12/09	15:21:40	mammal	golden taikn	1	33.693	107.631	2347	2014-08-22	2015-04-14
486	CQ-20140822-79-0055	20140822-79	2014/12/09	17:59:47	mammal	golden taikn	1	33.693	107.631	2347	2014-08-22	2015-04-14
487	CQ-20140822-79-0057	20140822-79	2014/12/09	23:28:02	mammal	golden taikn	1	33.693	107.631	2347	2014-08-22	2015-04-14
488	CQ-20140822-79-0061	20140822-79	2014/12/10	01:17:23	mammal	golden taikn	1	33.693	107.631	2347	2014-08-22	2015-04-14
489	CQ-20140822-79-0063	20140822-79	2014/12/10	07:08:56	mammal	golden taikn	1	33.693	107.631	2347	2014-08-22	2015-04-14
490	CQ-20140822-79-0065	20140822-79	2014/12/15	15:47:18	mammal	golden taikn	1	33.693	107.631	2347	2014-08-22	2015-04-14
491	CQ-20140822-79-0067	20140822-79	2014/12/10	18:13:26	mammal	golden taikn	1	33.693	107.631	2347	2014-08-22	2015-04-14
492	CQ-20140822-79-0073	20140822-79	2014/12/12	02:04:35	mammal	golden taikn	1	33.693	107.631	2347	2014-08-22	2015-04-14
493	CQ-20140822-79-0074	20140822-79	2014/12/15	15:46:52	mammal	golden taikn	1	33.693	107.631	2347	2014-08-22	2015-04-14
494	CQ-20140822-79-0089	20140822-79	2015/01/28	08:13:38	mammal	golden taikn	1	33.693	107.631	2347	2014-08-22	2015-04-14
495	CQ-20140822-79-0091	20140822-79	2015/1/29	17:09:18	mammal	golden taikn	1	33.693	107.631	2347	2014-08-22	2015-04-14
496	CQ-20140822-79-0093	20140822-79	2015/01/30	09:39:58	mammal	golden taikn	1	33.693	107.631	2347	2014-08-22	2015-04-14
497	CQ-20140822-79-0095	20140822-79	2015/01/30	17:48:30	mammal	golden taikn	1	33.693	107.631	2347	2014-08-22	2015-04-14
498	CQ-20140822-79-0097	20140822-79	2015/01/31	16:23:54	mammal	golden taikn	1	33.693	107.631	2347	2014-08-22	2015-04-14
499	CQ-20140822-79-0100	20140822-79	2015/02/02	07:38:34	mammal	golden taikn	1	33.693	107.631	2347	2014-08-22	2015-04-14
500	CQ-20140822-79-0104	20140822-79	2015/02/09	16:31:21	mammal	golden taikn	1	33.693	107.631	2347	2014-08-22	2015-04-14
501	CQ-20140822-79-0106	20140822-79	2015/02/10	17:58:43	mammal	golden taikn	1	33.693	107.631	2347	2014-08-22	2015-04-14
502	CQ-20140822-79-0124	20140822-79	2015/02/21	07:50:00	mammal	golden taikn	1	33.693	107.631	2347	2014-08-22	2015-04-14
503	CQ-20140822-79-0128	20140822-79	2015/02/27	16:01:06	mammal	golden taikn	1	33.693	107.631	2347	2014-08-22	2015-04-14
504	CQ-20140822-79-0133	20140822-79	2015/03/02	04:02:52	mammal	golden taikn	1	33.693	107.631	2347	2014-08-22	2015-04-14
505	CQ-20140822-96-0005	20140822-96	2014/09/01	11:22:05	mammal	golden taikn	1	33.691	107.59	2170	2014-08-22	2015-04-27
506	CQ-20140822-96-0006	20140822-96	2014/09/01	12:26:48	mammal	golden taikn	2	33.691	107.59	2170	2014-08-22	2015-04-27
507	CQ-20140822-96-0009	20140822-96	2014/09/01	13:25:41	mammal	golden taikn	1	33.691	107.59	2170	2014-08-22	2015-04-27
508	CQ-20140822-96-0011	20140822-96	2014/09/03	09:17:54	mammal	golden taikn	2	33.691	107.59	2170	2014-08-22	2015-04-27
509	CQ-20140822-96-0014	20140822-96	2014/09/15	06:42:49	mammal	golden taikn	1	33.691	107.59	2170	2014-08-22	2015-04-27
510	CQ-20140822-96-0015	20140822-96	2014/09/15	08:14:21	mammal	golden taikn	1	33.691	107.59	2170	2014-08-22	2015-04-27
511	CQ-20140822-96-0016	20140822-96	2014/09/15	16:53:27	mammal	golden taikn	2	33.691	107.59	2170	2014-08-22	2015-04-27
512	CQ-20140822-96-0019	20140822-96	2014/09/18	10:41:43	mammal	golden taikn	1	33.691	107.59	2170	2014-08-22	2015-04-27
513	CQ-20140822-96-0022	20140822-96	2014/10/08	02:10:32	mammal	golden taikn	1	33.691	107.59	2170	2014-08-22	2015-04-27
514	CQ-20140822-96-0023	20140822-96	2014/10/08	06:21:55	mammal	golden taikn	1	33.691	107.59	2170	2014-08-22	2015-04-27
515	CQ-20140822-96-0024	20140822-96	2014/10/08	07:17:13	mammal	golden taikn	1	33.691	107.59	2170	2014-08-22	2015-04-27
516	CQ-20140822-96-0029	20140822-96	2014/10/12	16:31:15	mammal	golden taikn	2	33.691	107.59	2170	2014-08-22	2015-04-27
517	CQ-20140822-96-0036	20140822-96	2014/11/02	11:06:22	mammal	golden taikn	1	33.691	107.59	2170	2014-08-22	2015-04-27
518	CQ-20140822-96-0053	20140822-96	2015/04/10	14:42:07	mammal	golden taikn	1	33.691	107.59	2170	2014-08-22	2015-04-27
519	CQ-20140822-96-0055	20140822-96	2015/04/10	18:22:43	mammal	golden taikn	1	33.691	107.59	2170	2014-08-22	2015-04-27
520	CQ-20140822-96-0058	20140822-96	2015/04/11	17:37:36	mammal	golden taikn	2	33.691	107.59	2170	2014-08-22	2015-04-27
521	CQ-20140822-96-0061	20140822-96	2015/04/12	10:51:41	mammal	golden taikn	2	33.691	107.59	2170	2014-08-22	2015-04-27
522	CQ-20140822-96-0062	20140822-96	2015/04/12	11:59:33	mammal	golden taikn	1	33.691	107.59	2170	2014-08-22	2015-04-27
523	CQ-20140825-14-0027	20140825-14	2014/10/11	07:22:52	mammal	golden taikn	1	33.5617	107.644	1575	2014-08-25	2014-10-24
524	CQ-20140825-14-0031	20140825-14	2014/10/11	12:08:41	mammal	golden taikn	1	33.5617	107.644	1575	2014-08-25	2014-10-24
525	CQ-20140825-14-0033	20140825-14	2014/10/11	12:45:45	mammal	golden taikn	1	33.5617	107.644	1575	2014-08-25	2014-10-24
526	CQ-20140826-36-0063	20140826-36	2014/10/16	15:41:44	mammal	golden taikn	1	33.5717	107.702	1466	2014-08-26	2014-11-04
527	CQ-20140826-58-0045	20140826-58	2014/11/08	00:22:05	mammal	golden taikn	1	33.6748	107.505	1442	2014-08-26	2014-11-21
528	CQ-20140826-58-0053	20140826-58	2014/11/15	17:43:03	mammal	golden taikn	1	33.6748	107.505	1442	2014-08-26	2014-11-21
529	CQ-20140828-61-0014	20140828-61	2014/9/27	16:40:04	mammal	golden taikn	1	33.6848	107.496	1783	2014-08-28	2015-04-23
530	CQ-20140828-61-0016	20140828-61	2014/09/27	18:09:10	mammal	golden taikn	1	33.6848	107.496	1783	2014-08-28	2015-04-23
531	CQ-20140828-61-0018	20140828-61	2014/10/06	07:35:44	mammal	golden taikn	1	33.6848	107.496	1783	2014-08-28	2015-04-23
532	CQ-20140828-61-0020	20140828-61	2014/10/06	11:34:56	mammal	golden taikn	1	33.6848	107.496	1783	2014-08-28	2015-04-23
533	CQ-20140828-61-0022	20140828-61	2014/10/06	12:48:56	mammal	golden taikn	1	33.6848	107.496	1783	2014-08-28	2015-04-23
534	CQ-20140828-61-0024	20140828-61	2014/10/09	07:40:23	mammal	golden taikn	1	33.6848	107.496	1783	2014-08-28	2015-04-23
535	CQ-20140828-61-0030	20140828-61	2014/11/20	15:10:11	mammal	golden taikn	1	33.6848	107.496	1783	2014-08-28	2015-04-23
536	CQ-20140828-61-0034	20140828-61	2014/12/12	12:51:47	mammal	golden taikn	1	33.6848	107.496	1783	2014-08-28	2015-04-23
537	CQ-20140828-61-0035	20140828-61	2015/4/14	13:07:18	mammal	golden taikn	1	33.6848	107.496	1783	2014-08-28	2015-04-23
538	CQ-20140829-50-0017	20140829-50	2014/08/31	08:12:33	mammal	golden taikn	1	33.6802	107.519	1810	2014-08-29	2015-04-20
539	CQ-20140829-50-0045	20140829-50	2015/03/05	07:53:26	mammal	golden taikn	1	33.6802	107.519	1810	2014-08-29	2015-04-20
540	CQ-20140829-50-0057	20140829-50	2015/04/10	05:26:14	mammal	golden taikn	1	33.6802	107.519	1810	2014-08-29	2015-04-20
541	CQ-20140829-50-0059	20140829-50	2015/04/11	14:28:05	mammal	golden taikn	1	33.6802	107.519	1810	2014-08-29	2015-04-20
542	CQ-20140829-52-0017	20140829-52	2014/09/21	08:52:38	mammal	golden taikn	1	33.6487	107.471	1636	2014-08-29	2014-10-26
543	CQ-20140903-200-0011	20140903-200	2014/09/10	14:43:09	mammal	golden taikn	1	33.6178	107.435	1406	2014-09-03	2014-10-27
544	CQ-20140903-59-0013	20140903-59	2014/09/19	17:14:31	mammal	golden taikn	1	33.6221	107.432	1653	2014-09-03	2014-11-13
545	CQ-20140904-21-0115	20140904-21	2014/12/22	16:48:20	mammal	golden taikn	1	33.6329	107.7	2035	2014-09-04	2015-04-24
546	CQ-20140904-21-0117	20140904-21	2015/02/17	14:24:46	mammal	golden taikn	1	33.6329	107.7	2035	2014-09-04	2015-04-24
547	CQ-20140904-21-0123	20140904-21	2015/04/10	18:28:35	mammal	golden taikn	1	33.6329	107.7	2035	2014-09-04	2015-04-24
548	CQ-20140904-22-0001	20140904-22	2014/09/14	06:58:27	mammal	golden taikn	1	33.6291	107.688	1995	2014-09-04	2015-04-23
549	CQ-20140904-22-0013	20140904-22	2014/09/25	17:00:16	mammal	golden taikn	1	33.6291	107.688	1995	2014-09-04	2015-04-23
550	CQ-20140904-22-0025	20140904-22	2014/10/18	01:36:12	mammal	golden taikn	1	33.6291	107.688	1995	2014-09-04	2015-04-23
551	CQ-20140904-22-0035	20140904-22	2014/10/25	23:36:55	mammal	golden taikn	1	33.6291	107.688	1995	2014-09-04	2015-04-23
552	CQ-20140904-22-0039	20140904-22	2014/10/26	12:56:08	mammal	golden taikn	1	33.6291	107.688	1995	2014-09-04	2015-04-23
553	CQ-20140904-22-0045	20140904-22	2014/10/26	14:39:17	mammal	golden taikn	1	33.6291	107.688	1995	2014-09-04	2015-04-23
554	CQ-20140904-22-0055	20140904-22	2014/10/26	16:17:19	mammal	golden taikn	1	33.6291	107.688	1995	2014-09-04	2015-04-23
555	CQ-20140904-22-0059	20140904-22	2014/10/26	22:20:40	mammal	golden taikn	1	33.6291	107.688	1995	2014-09-04	2015-04-23
556	CQ-20140904-22-0063	20140904-22	2014/11/04	02:59:25	mammal	golden taikn	1	33.6291	107.688	1995	2014-09-04	2015-04-23
557	CQ-20140904-22-0065	20140904-22	2014/11/04	07:09:57	mammal	golden taikn	2	33.6291	107.688	1995	2014-09-04	2015-04-23
558	CQ-20140904-22-0067	20140904-22	2014/11/12	17:23:42	mammal	golden taikn	1	33.6291	107.688	1995	2014-09-04	2015-04-23
559	CQ-20140904-22-0069	20140904-22	2014/11/29	10:18:24	mammal	golden taikn	1	33.6291	107.688	1995	2014-09-04	2015-04-23
560	CQ-20140904-22-0075	20140904-22	2014/12/04	10:39:59	mammal	golden taikn	1	33.6291	107.688	1995	2014-09-04	2015-04-23
561	CQ-20140904-22-0078	20140904-22	2014/12/16	16:33:24	mammal	golden taikn	1	33.6291	107.688	1995	2014-09-04	2015-04-23
562	CQ-20140904-22-0085	20140904-22	2015/01/23	15:24:31	mammal	golden taikn	1	33.6291	107.688	1995	2014-09-04	2015-04-23
563	CQ-20140904-22-0091	20140904-22	2015/02/07	16:16:48	mammal	golden taikn	1	33.6291	107.688	1995	2014-09-04	2015-04-23
564	CQ-20140904-22-0093	20140904-22	2015/02/27	14:50:55	mammal	golden taikn	1	33.6291	107.688	1995	2014-09-04	2015-04-23
565	CQ-20140904-22-0095	20140904-22	2015/02/27	17:05:13	mammal	golden taikn	1	33.6291	107.688	1995	2014-09-04	2015-04-23
566	CQ-20140904-22-0097	20140904-22	2015/03/23	18:38:58	mammal	golden taikn	1	33.6291	107.688	1995	2014-09-04	2015-04-23
567	CQ-20140904-22-0115	20140904-22	2015/04/09	17:44:42	mammal	golden taikn	1	33.6291	107.688	1995	2014-09-04	2015-04-23
568	CQ-20140904-27-0004	20140904-27	2014/09/08	02:36:16	mammal	golden taikn	1	33.6098	107.637	1833	2014-09-04	2015-04-28
569	CQ-20140904-27-0012	20140904-27	2014/09/14	02:46:31	mammal	golden taikn	1	33.6098	107.637	1833	2014-09-04	2015-04-28
570	CQ-20140904-27-0014	20140904-27	2014/09/14	07:22:03	mammal	golden taikn	4	33.6098	107.637	1833	2014-09-04	2015-04-28
571	CQ-20140904-27-0020	20140904-27	2014/09/15	06:20:35	mammal	golden taikn	1	33.6098	107.637	1833	2014-09-04	2015-04-28
572	CQ-20140904-27-0024	20140904-27	2014/09/20	16:48:30	mammal	golden taikn	2	33.6098	107.637	1833	2014-09-04	2015-04-28
573	CQ-20140904-27-0030	20140904-27	2014/10/04	01:09:15	mammal	golden taikn	1	33.6098	107.637	1833	2014-09-04	2015-04-28
574	CQ-20140904-27-0050	20140904-27	2014/10/04	15:09:13	mammal	golden taikn	3	33.6098	107.637	1833	2014-09-04	2015-04-28
575	CQ-20140904-27-0062	20140904-27	2014/10/28	12:57:39	mammal	golden taikn	4	33.6098	107.637	1833	2014-09-04	2015-04-28
576	CQ-20140904-27-0064	20140904-27	2014/10/30	12:25:22	mammal	golden taikn	1	33.6098	107.637	1833	2014-09-04	2015-04-28
577	CQ-20140904-27-0066	20140904-27	2014/11/01	06:57:08	mammal	golden taikn	1	33.6098	107.637	1833	2014-09-04	2015-04-28
578	CQ-20140904-27-0068	20140904-27	2014/11/01	17:44:33	mammal	golden taikn	1	33.6098	107.637	1833	2014-09-04	2015-04-28
579	CQ-20140904-27-0070	20140904-27	2014/11/02	18:00:20	mammal	golden taikn	2	33.6098	107.637	1833	2014-09-04	2015-04-28
580	CQ-20140904-27-0072	20140904-27	2014/11/02	22:00:15	mammal	golden taikn	1	33.6098	107.637	1833	2014-09-04	2015-04-28
581	CQ-20140904-27-0076	20140904-27	2014/11/02	22:33:46	mammal	golden taikn	1	33.6098	107.637	1833	2014-09-04	2015-04-28
582	CQ-20140904-27-0078	20140904-27	2014/11/06	15:18:18	mammal	golden taikn	1	33.6098	107.637	1833	2014-09-04	2015-04-28
583	CQ-20140904-27-0080	20140904-27	2014/11/07	01:54:42	mammal	golden taikn	1	33.6098	107.637	1833	2014-09-04	2015-04-28
584	CQ-20140904-27-0083	20140904-27	2014/11/7	7:53:14	mammal	golden taikn	1	33.6098	107.637	1833	2014-09-04	2015-04-28
585	CQ-20140904-27-0086	20140904-27	2014/11/07	16:37:45	mammal	golden taikn	3	33.6098	107.637	1833	2014-09-04	2015-04-28
586	CQ-20140904-27-0092	20140904-27	2014/11/08	06:27:47	mammal	golden taikn	1	33.6098	107.637	1833	2014-09-04	2015-04-28
587	CQ-20140904-27-0094	20140904-27	2014/11/11	07:12:01	mammal	golden taikn	1	33.6098	107.637	1833	2014-09-04	2015-04-28
588	CQ-20140904-27-0100	20140904-27	2014/11/14	23:46:04	mammal	golden taikn	1	33.6098	107.637	1833	2014-09-04	2015-04-28
589	CQ-20140904-27-0102	20140904-27	2014/11/15	07:38:15	mammal	golden taikn	1	33.6098	107.637	1833	2014-09-04	2015-04-28
590	CQ-20140904-27-0112	20140904-27	2015/03/31	23:39:43	mammal	golden taikn	1	33.6098	107.637	1833	2014-09-04	2015-04-28
591	CQ-20140904-27-0116	20140904-27	2015/04/03	18:52:03	mammal	golden taikn	1	33.6098	107.637	1833	2014-09-04	2015-04-28
592	CQ-20140904-27-0118	20140904-27	2015/04/06	00:09:58	mammal	golden taikn	1	33.6098	107.637	1833	2014-09-04	2015-04-28
593	CQ-20140904-27-0120	20140904-27	2015/04/08	06:41:27	mammal	golden taikn	1	33.6098	107.637	1833	2014-09-04	2015-04-28
594	CQ-20140904-27-0122	20140904-27	2015/04/08	16:17:32	mammal	golden taikn	1	33.6098	107.637	1833	2014-09-04	2015-04-28
595	CQ-20140904-27-0124	20140904-27	2015/04/10	05:47:44	mammal	golden taikn	1	33.6098	107.637	1833	2014-09-04	2015-04-28
596	CQ-20140904-27-0136	20140904-27	2015/04/24	20:12:13	mammal	golden taikn	1	33.6098	107.637	1833	2014-09-04	2015-04-28
597	CQ-20140904-27-0142	20140904-27	2015/04/26	09:13:30	mammal	golden taikn	1	33.6098	107.637	1833	2014-09-04	2015-04-28
598	CQ-20140904-73-0024	20140904-73	2014/10/6	17:01:22	mammal	golden taikn	1	33.6121	107.614	2301	2014-09-04	2015-04-13
599	CQ-20140904-75-0069	20140904-75	2014/10/22	16:25:51	mammal	golden taikn	1	33.6316	107.601	1810	2014-09-04	2015-04-16
600	CQ-20140904-75-0099	20140904-75	2015/02/01	14:46:25	mammal	golden taikn	1	33.6316	107.601	1810	2014-09-04	2015-04-16
601	CQ-20140904-75-0101	20140904-75	2015/02/01	17:53:38	mammal	golden taikn	1	33.6316	107.601	1810	2014-09-04	2015-04-16
602	CQ-20140905-23-0029	20140905-23	2014/11/05	18:26:04	mammal	golden taikn	1	33.6294	107.713	0	2014-09-05	2015-04-24
603	CQ-20140905-23-0039	20140905-23	2014/11/12	08:35:06	mammal	golden taikn	1	33.6294	107.713	0	2014-09-05	2015-04-24
604	CQ-20140905-23-0129	20140905-23	2015/03/19	02:47:20	mammal	golden taikn	1	33.6294	107.713	0	2014-09-05	2015-04-24
605	CQ-20140905-23-0159	20140905-23	2015/04/04	18:45:53	mammal	golden taikn	1	33.6294	107.713	0	2014-09-05	2015-04-24
606	CQ-20140905-23-0173	20140905-23	2015/04/13	03:18:48	mammal	golden taikn	1	33.6294	107.713	0	2014-09-05	2015-04-24
607	CQ-20140905-23-0174	20140905-23	2015/04/13	04:22:37	mammal	golden taikn	1	33.6294	107.713	0	2014-09-05	2015-04-24
608	CQ-20140905-23-0175	20140905-23	2015/04/14	16:57:28	mammal	golden taikn	1	33.6294	107.713	0	2014-09-05	2015-04-24
609	CQ-20140905-24-0005	20140905-24	2014/09/11	10:25:33	mammal	golden taikn	1	33.6174	107.713	1787	2014-09-05	2015-04-24
610	CQ-20140905-24-0007	20140905-24	2014/09/14	12:38:51	mammal	golden taikn	1	33.6174	107.713	1787	2014-09-05	2015-04-24
611	CQ-20140905-24-0015	20140905-24	2014/09/16	10:06:45	mammal	golden taikn	1	33.6174	107.713	1787	2014-09-05	2015-04-24
612	CQ-20140905-24-0021	20140905-24	2014/09/16	14:34:52	mammal	golden taikn	1	33.6174	107.713	1787	2014-09-05	2015-04-24
613	CQ-20140905-24-0023	20140905-24	2014/09/17	09:22:01	mammal	golden taikn	1	33.6174	107.713	1787	2014-09-05	2015-04-24
614	CQ-20140905-24-0027	20140905-24	2014/09/18	14:39:30	mammal	golden taikn	1	33.6174	107.713	1787	2014-09-05	2015-04-24
615	CQ-20140905-24-0041	20140905-24	2014/09/23	14:03:58	mammal	golden taikn	1	33.6174	107.713	1787	2014-09-05	2015-04-24
616	CQ-20140905-24-0059	20140905-24	2014/09/28	16:21:32	mammal	golden taikn	1	33.6174	107.713	1787	2014-09-05	2015-04-24
617	CQ-20140905-24-0117	20140905-24	2014/10/29	11:43:52	mammal	golden taikn	2	33.6174	107.713	1787	2014-09-05	2015-04-24
618	CQ-20140905-24-0122	20140905-24	2014/10/29	13:57:14	mammal	golden taikn	1	33.6174	107.713	1787	2014-09-05	2015-04-24
619	CQ-20140905-24-0123	20140905-24	2014/11/08	17:51:45	mammal	golden taikn	1	33.6174	107.713	1787	2014-09-05	2015-04-24
620	CQ-20140905-24-0127	20140905-24	2014/11/09	07:33:14	mammal	golden taikn	2	33.6174	107.713	1787	2014-09-05	2015-04-24
621	CQ-20140905-24-0131	20140905-24	2014/11/09	16:25:31	mammal	golden taikn	1	33.6174	107.713	1787	2014-09-05	2015-04-24
622	CQ-20140905-24-0133	20140905-24	2014/11/09	17:47:41	mammal	golden taikn	1	33.6174	107.713	1787	2014-09-05	2015-04-24
623	CQ-20140905-24-0135	20140905-24	2014/11/09	22:09:10	mammal	golden taikn	1	33.6174	107.713	1787	2014-09-05	2015-04-24
624	CQ-20140905-24-0137	20140905-24	2014/11/10	07:00:04	mammal	golden taikn	1	33.6174	107.713	1787	2014-09-05	2015-04-24
625	CQ-20140905-24-0139	20140905-24	2014/11/10	07:37:10	mammal	golden taikn	1	33.6174	107.713	1787	2014-09-05	2015-04-24
626	CQ-20140905-24-0143	20140905-24	2014/11/15	17:10:59	mammal	golden taikn	1	33.6174	107.713	1787	2014-09-05	2015-04-24
627	CQ-20140905-24-0151	20140905-24	2014/11/16	08:07:22	mammal	golden taikn	2	33.6174	107.713	1787	2014-09-05	2015-04-24
628	CQ-20140905-24-0159	20140905-24	2014/11/25	17:17:32	mammal	golden taikn	2	33.6174	107.713	1787	2014-09-05	2015-04-24
629	CQ-20140905-24-0163	20140905-24	2014/11/26	01:11:56	mammal	golden taikn	1	33.6174	107.713	1787	2014-09-05	2015-04-24
630	CQ-20140905-24-0202	20140905-24	2015/04/03	19:43:14	mammal	golden taikn	1	33.6174	107.713	1787	2014-09-05	2015-04-24
631	CQ-20140905-24-0206	20140905-24	2015/04/04	08:52:42	mammal	golden taikn	2	33.6174	107.713	1787	2014-09-05	2015-04-24
632	CQ-20140905-24-0210	20140905-24	2015/04/04	14:40:24	mammal	golden taikn	1	33.6174	107.713	1787	2014-09-05	2015-04-24
633	CQ-20140905-24-0214	20140905-24	2015/04/06	02:30:54	mammal	golden taikn	1	33.6174	107.713	1787	2014-09-05	2015-04-24
634	CQ-20140905-24-0216	20140905-24	2015/04/06	08:35:31	mammal	golden taikn	1	33.6174	107.713	1787	2014-09-05	2015-04-24
635	CQ-20140905-24-0218	20140905-24	2015/04/07	02:05:09	mammal	golden taikn	1	33.6174	107.713	1787	2014-09-05	2015-04-24
636	CQ-20140905-24-0220	20140905-24	2015/04/07	06:05:46	mammal	golden taikn	2	33.6174	107.713	1787	2014-09-05	2015-04-24
637	CQ-20140905-24-0224	20140905-24	2015/04/07	06:39:30	mammal	golden taikn	1	33.6174	107.713	1787	2014-09-05	2015-04-24
638	CQ-20140905-24-0228	20140905-24	2015/04/07	07:33:41	mammal	golden taikn	1	33.6174	107.713	1787	2014-09-05	2015-04-24
639	CQ-20140905-24-0230	20140905-24	2015/04/07	16:37:13	mammal	golden taikn	1	33.6174	107.713	1787	2014-09-05	2015-04-24
640	CQ-20140905-24-0234	20140905-24	2015/04/07	17:27:00	mammal	golden taikn	1	33.6174	107.713	1787	2014-09-05	2015-04-24
641	CQ-20140905-24-0240	20140905-24	2015/04/07	18:33:34	mammal	golden taikn	1	33.6174	107.713	1787	2014-09-05	2015-04-24
642	CQ-20140905-24-0262	20140905-24	2015/04/18	09:08:32	mammal	golden taikn	1	33.6174	107.713	1787	2014-09-05	2015-04-24
643	CQ-20140905-24-0268	20140905-24	2015/04/18	17:25:47	mammal	golden taikn	1	33.6174	107.713	1787	2014-09-05	2015-04-24
644	CQ-20140905-28-0005	20140905-28	2014/09/17	15:51:34	mammal	golden taikn	1	33.6111	107.648	1632	2014-09-05	2015-04-28
645	CQ-20140905-28-0009	20140905-28	2014/09/25	15:40:30	mammal	golden taikn	2	33.6111	107.648	1632	2014-09-05	2015-04-28
646	CQ-20140905-28-0011	20140905-28	2014/09/25	17:27:32	mammal	golden taikn	1	33.6111	107.648	1632	2014-09-05	2015-04-28
647	CQ-20140905-28-0013	20140905-28	2014/09/28	16:58:01	mammal	golden taikn	1	33.6111	107.648	1632	2014-09-05	2015-04-28
648	CQ-20140905-28-0049	20140905-28	2014/10/30	07:37:27	mammal	golden taikn	1	33.6111	107.648	1632	2014-09-05	2015-04-28
649	CQ-20140905-28-0051	20140905-28	2014/10/30	10:17:14	mammal	golden taikn	1	33.6111	107.648	1632	2014-09-05	2015-04-28
650	CQ-20140905-28-0055	20140905-28	2014/11/02	06:16:50	mammal	golden taikn	1	33.6111	107.648	1632	2014-09-05	2015-04-28
651	CQ-20140905-28-0063	20140905-28	2014/11/07	14:34:05	mammal	golden taikn	1	33.6111	107.648	1632	2014-09-05	2015-04-28
652	CQ-20140905-28-0075	20140905-28	2014/11/08	06:29:21	mammal	golden taikn	1	33.6111	107.648	1632	2014-09-05	2015-04-28
653	CQ-20140905-28-0077	20140905-28	2014/11/08	13:42:06	mammal	golden taikn	1	33.6111	107.648	1632	2014-09-05	2015-04-28
654	CQ-20140905-28-0083	20140905-28	2014/11/11	12:03:09	mammal	golden taikn	1	33.6111	107.648	1632	2014-09-05	2015-04-28
655	CQ-20140905-28-0085	20140905-28	2014/11/14	14:09:36	mammal	golden taikn	1	33.6111	107.648	1632	2014-09-05	2015-04-28
656	CQ-20140905-28-0087	20140905-28	2014/11/15	14:03:24	mammal	golden taikn	1	33.6111	107.648	1632	2014-09-05	2015-04-28
657	CQ-20140905-28-0090	20140905-28	2014/11/19	10:16:34	mammal	golden taikn	1	33.6111	107.648	1632	2014-09-05	2015-04-28
658	CQ-20140905-28-0099	20140905-28	2015/02/23	15:53:31	mammal	golden taikn	1	33.6111	107.648	1632	2014-09-05	2015-04-28
659	CQ-20140905-28-0107	20140905-28	2015/04/04	11:58:44	mammal	golden taikn	2	33.6111	107.648	1632	2014-09-05	2015-04-28
660	CQ-20140905-28-0113	20140905-28	2015/04/04	13:19:48	mammal	golden taikn	1	33.6111	107.648	1632	2014-09-05	2015-04-28
661	CQ-20140905-28-0115	20140905-28	2015/04/07	12:48:44	mammal	golden taikn	1	33.6111	107.648	1632	2014-09-05	2015-04-28
662	CQ-20140905-28-0117	20140905-28	2015/04/09	05:55:50	mammal	golden taikn	1	33.6111	107.648	1632	2014-09-05	2015-04-28
663	CQ-20140905-29-0003	20140905-29	2014/09/11	16:10:27	mammal	golden taikn	2	33.6218	107.663	1917	2014-09-05	2015-04-27
664	CQ-20140905-29-0005	20140905-29	2014/09/12	15:42:12	mammal	golden taikn	2	33.6218	107.663	1917	2014-09-05	2015-04-27
665	CQ-20140905-29-0009	20140905-29	2014/09/14	16:54:57	mammal	golden taikn	1	33.6218	107.663	1917	2014-09-05	2015-04-27
666	CQ-20140905-29-0017	20140905-29	2014/10/06	04:25:26	mammal	golden taikn	1	33.6218	107.663	1917	2014-09-05	2015-04-27
667	CQ-20140905-29-0027	20140905-29	2014/10/29	15:00:14	mammal	golden taikn	1	33.6218	107.663	1917	2014-09-05	2015-04-27
668	CQ-20140905-29-0035	20140905-29	2014/10/30	08:33:46	mammal	golden taikn	1	33.6218	107.663	1917	2014-09-05	2015-04-27
669	CQ-20140905-29-0039	20140905-29	2014/10/30	16:26:35	mammal	golden taikn	1	33.6218	107.663	1917	2014-09-05	2015-04-27
670	CQ-20140905-29-0043	20140905-29	2014/10/31	06:19:33	mammal	golden taikn	1	33.6218	107.663	1917	2014-09-05	2015-04-27
671	CQ-20140905-29-0045	20140905-29	2014/11/07	12:56:21	mammal	golden taikn	1	33.6218	107.663	1917	2014-09-05	2015-04-27
672	CQ-20140905-29-0073	20140905-29	2015/03/28	06:44:21	mammal	golden taikn	1	33.6218	107.663	1917	2014-09-05	2015-04-27
673	CQ-20140905-29-0075	20140905-29	2015/03/28	09:01:10	mammal	golden taikn	1	33.6218	107.663	1917	2014-09-05	2015-04-27
674	CQ-20140905-29-0079	20140905-29	2015/03/29	09:16:36	mammal	golden taikn	1	33.6218	107.663	1917	2014-09-05	2015-04-27
675	CQ-20140905-29-0081	20140905-29	2015/03/29	10:29:48	mammal	golden taikn	1	33.6218	107.663	1917	2014-09-05	2015-04-27
676	CQ-20140905-29-0083	20140905-29	2015/04/03	02:16:17	mammal	golden taikn	1	33.6218	107.663	1917	2014-09-05	2015-04-27
677	CQ-20140905-29-0085	20140905-29	2015/04/03	10:42:22	mammal	golden taikn	1	33.6218	107.663	1917	2014-09-05	2015-04-27
678	CQ-20140905-29-0089	20140905-29	2015/04/03	19:19:56	mammal	golden taikn	1	33.6218	107.663	1917	2014-09-05	2015-04-27
679	CQ-20140905-29-0091	20140905-29	2015/04/07	02:12:17	mammal	golden taikn	1	33.6218	107.663	1917	2014-09-05	2015-04-27
680	CQ-20140905-29-0107	20140905-29	2015/04/08	02:03:15	mammal	golden taikn	1	33.6218	107.663	1917	2014-09-05	2015-04-27
681	CQ-20140905-29-0109	20140905-29	2015/04/08	15:09:27	mammal	golden taikn	1	33.6218	107.663	1917	2014-09-05	2015-04-27
682	CQ-20140905-29-0111	20140905-29	2015/04/09	01:53:18	mammal	golden taikn	1	33.6218	107.663	1917	2014-09-05	2015-04-27
683	CQ-20140905-29-0113	20140905-29	2015/04/10	17:55:17	mammal	golden taikn	1	33.6218	107.663	1917	2014-09-05	2015-04-27
684	CQ-20140905-29-0115	20140905-29	2015/04/11	10:37:52	mammal	golden taikn	2	33.6218	107.663	1917	2014-09-05	2015-04-27
685	CQ-20140905-29-0123	20140905-29	2015/04/11	15:58:16	mammal	golden taikn	2	33.6218	107.663	1917	2014-09-05	2015-04-27
686	CQ-20140905-29-0139	20140905-29	2015/04/15	18:05:40	mammal	golden taikn	4	33.6218	107.663	1917	2014-09-05	2015-04-27
687	CQ-20140905-29-0149	20140905-29	2015/04/24	15:56:39	mammal	golden taikn	2	33.6218	107.663	1917	2014-09-05	2015-04-27
688	CQ-20140918-62-0007	20140918-62	2014/09/26	17:56:10	mammal	golden taikn	1	33.6641	107.631	1807	2014-09-18	2015-04-24
689	CQ-20140918-62-0013	20140918-62	2014/10/30	07:17:14	mammal	golden taikn	1	33.6641	107.631	1807	2014-09-18	2015-04-24
690	CQ-20140918-62-0019	20140918-62	2014/10/30	08:46:08	mammal	golden taikn	1	33.6641	107.631	1807	2014-09-18	2015-04-24
691	CQ-20140918-62-0021	20140918-62	2014/10/30	09:32:15	mammal	golden taikn	1	33.6641	107.631	1807	2014-09-18	2015-04-24
692	CQ-20140918-62-0023	20140918-62	2014/10/30	17:44:09	mammal	golden taikn	1	33.6641	107.631	1807	2014-09-18	2015-04-24
693	CQ-20140918-62-0027	20140918-62	2014/10/31	7:45:56	mammal	golden taikn	1	33.6641	107.631	1807	2014-09-18	2015-04-24
694	CQ-20140918-62-0033	20140918-62	2014/11/11	11:39:57	mammal	golden taikn	2	33.6641	107.631	1807	2014-09-18	2015-04-24
695	CQ-20140918-62-0083	20140918-62	2015/4/2	23:45:04	mammal	golden taikn	1	33.6641	107.631	1807	2014-09-18	2015-04-24
696	CQ-20140918-62-0085	20140918-62	2015/04/09	12:42:09	mammal	golden taikn	1	33.6641	107.631	1807	2014-09-18	2015-04-24
697	CQ-20140918-62-0101	20140918-62	2015/04/09	16:00:22	mammal	golden taikn	3	33.6641	107.631	1807	2014-09-18	2015-04-24
698	CQ-20140918-62-0111	20140918-62	2015/04/16	16:05:27	mammal	golden taikn	2	33.6641	107.631	1807	2014-09-18	2015-04-24
699	CQ-20140918-62-0113	20140918-62	2015/04/17	16:55:36	mammal	golden taikn	2	33.6641	107.631	1807	2014-09-18	2015-04-24
700	CQ-20140918-62-0115	20140918-62	2015/04/18	16:23:18	mammal	golden taikn	2	33.6641	107.631	1807	2014-09-18	2015-04-24
701	CQ-20140919-67-0007	20140919-67	2014/10/03	00:05:07	mammal	golden taikn	1	33.6501	107.624	1754	2014-09-19	2015-04-25
702	CQ-20140919-67-0019	20140919-67	2014/10/12	18:37:11	mammal	golden taikn	1	33.6501	107.624	1754	2014-09-19	2015-04-25
703	CQ-20140919-67-0020	20140919-67	2014/10/13	08:40:32	mammal	golden taikn	1	33.6501	107.624	1754	2014-09-19	2015-04-25
704	CQ-20140919-67-0024	20140919-67	2014/10/14	23:14:56	mammal	golden taikn	1	33.6501	107.624	1754	2014-09-19	2015-04-25
705	CQ-20140919-67-0028	20140919-67	2014/10/16	06:21:38	mammal	golden taikn	1	33.6501	107.624	1754	2014-09-19	2015-04-25
706	CQ-20140919-67-0030	20140919-67	2014/10/27	01:04:32	mammal	golden taikn	1	33.6501	107.624	1754	2014-09-19	2015-04-25
707	CQ-20140919-67-0033	20140919-67	2014/10/31	15:10:28	mammal	golden taikn	1	33.6501	107.624	1754	2014-09-19	2015-04-25
708	CQ-20140919-67-0036	20140919-67	2014/11/02	02:37:23	mammal	golden taikn	1	33.6501	107.624	1754	2014-09-19	2015-04-25
709	CQ-20140919-67-0037	20140919-67	2014/11/02	08:13:01	mammal	golden taikn	1	33.6501	107.624	1754	2014-09-19	2015-04-25
710	CQ-20140919-67-0038	20140919-67	2014/11/02	10:51:15	mammal	golden taikn	1	33.6501	107.624	1754	2014-09-19	2015-04-25
711	CQ-20140919-67-0039	20140919-67	2014/11/02	14:11:37	mammal	golden taikn	1	33.6501	107.624	1754	2014-09-19	2015-04-25
712	CQ-20140919-67-0040	20140919-67	2014/11/03	15:16:49	mammal	golden taikn	1	33.6501	107.624	1754	2014-09-19	2015-04-25
713	CQ-20140919-67-0042	20140919-67	2014/11/03	15:53:44	mammal	golden taikn	1	33.6501	107.624	1754	2014-09-19	2015-04-25
714	CQ-20140919-67-0044	20140919-67	2014/11/04	01:51:39	mammal	golden taikn	1	33.6501	107.624	1754	2014-09-19	2015-04-25
715	CQ-20140919-67-0045	20140919-67	2014/11/04	15:55:25	mammal	golden taikn	1	33.6501	107.624	1754	2014-09-19	2015-04-25
716	CQ-20140919-67-0048	20140919-67	2014/11/12	06:57:02	mammal	golden taikn	1	33.6501	107.624	1754	2014-09-19	2015-04-25
717	CQ-20140919-67-0052	20140919-67	2014/11/16	21:38:14	mammal	golden taikn	1	33.6501	107.624	1754	2014-09-19	2015-04-25
718	CQ-20140919-67-0054	20140919-67	2014/11/21	00:37:56	mammal	golden taikn	1	33.6501	107.624	1754	2014-09-19	2015-04-25
719	CQ-20140919-67-0055	20140919-67	2014/11/21	17:32:37	mammal	golden taikn	1	33.6501	107.624	1754	2014-09-19	2015-04-25
720	CQ-20140919-67-0058	20140919-67	2014/11/22	09:51:24	mammal	golden taikn	1	33.6501	107.624	1754	2014-09-19	2015-04-25
721	CQ-20140919-67-0730	20140919-67	2015/02/23	08:39:12	mammal	golden taikn	1	33.6501	107.624	1754	2014-09-19	2015-04-25
722	CQ-20140919-67-1280	20140919-67	2015/04/02	10:33:43	mammal	golden taikn	1	33.6501	107.624	1754	2014-09-19	2015-04-25
723	CQ-20140919-67-1284	20140919-67	2015/04/04	05:57:30	mammal	golden taikn	1	33.6501	107.624	1754	2014-09-19	2015-04-25
724	CQ-20140919-67-1289	20140919-67	2015/04/05	02:50:30	mammal	golden taikn	1	33.6501	107.624	1754	2014-09-19	2015-04-25
725	CQ-20140919-67-1296	20140919-67	2015/04/10	02:16:27	mammal	golden taikn	1	33.6501	107.624	1754	2014-09-19	2015-04-25
726	CQ-20140919-67-1324	20140919-67	2015/04/20	23:23:26	mammal	golden taikn	1	33.6501	107.624	1754	2014-09-19	2015-04-25
727	CQ-20140919-67-1327	20140919-67	2015/04/21	19:27:32	mammal	golden taikn	1	33.6501	107.624	1754	2014-09-19	2015-04-25
728	CQ-20140919-67-1329	20140919-67	2015/04/22	00:33:23	mammal	golden taikn	1	33.6501	107.624	1754	2014-09-19	2015-04-25
729	CQ-20140919-67-1338	20140919-67	2015/04/22	03:37:20	mammal	golden taikn	1	33.6501	107.624	1754	2014-09-19	2015-04-25
730	CQ-20140919-67-1339	20140919-67	2015/04/22	05:10:48	mammal	golden taikn	1	33.6501	107.624	1754	2014-09-19	2015-04-25
731	CQ-20140919-67-1343	20140919-67	2015/04/23	22:18:53	mammal	golden taikn	1	33.6501	107.624	1754	2014-09-19	2015-04-25
732	CQ-20140919-97-0017	20140919-97	2014/09/29	01:56:34	mammal	golden taikn	1	33.6515	107.606	1650	2014-09-19	2015-04-23
733	CQ-20140919-97-0029	20140919-97	2014/10/6	18:23:50	mammal	golden taikn	1	33.6515	107.606	1650	2014-09-19	2015-04-23
734	CQ-20140919-97-0041	20140919-97	2014/10/17	08:50:00	mammal	golden taikn	1	33.6515	107.606	1650	2014-09-19	2015-04-23
735	CQ-20140919-97-0091	20140919-97	2014/11/06	14:30:03	mammal	golden taikn	1	33.6515	107.606	1650	2014-09-19	2015-04-23
736	CQ-20140919-97-0093	20140919-97	2014/11/11	14:33:01	mammal	golden taikn	1	33.6515	107.606	1650	2014-09-19	2015-04-23
737	CQ-20140919-97-0099	20140919-97	2014/12/15	17:20:02	mammal	golden taikn	1	33.6515	107.606	1650	2014-09-19	2015-04-23
738	CQ-20140919-97-0141	20140919-97	2015/04/09	03:32:05	mammal	golden taikn	1	33.6515	107.606	1650	2014-09-19	2015-04-23
739	CQ-20140919-97-0149	20140919-97	2015/04/13	14:48:50	mammal	golden taikn	1	33.6515	107.606	1650	2014-09-19	2015-04-23
740	CQ-20140920-40-0009	20140920-40	2014/09/24	16:08:02	mammal	golden taikn	2	33.6208	107.687	1855	2014-09-20	2015-01-11
741	CQ-20140920-40-0101	20140920-40	2014/10/24	07:15:30	mammal	golden taikn	1	33.6208	107.687	1855	2014-09-20	2015-01-11
742	CQ-20140920-69-0015	20140920-69	2014/10/18	16:17:14	mammal	golden taikn	1	33.68	107.655	2127	2014-09-20	2015-04-24
743	CQ-20140920-69-0030	20140920-69	2014/10/30	15:45:32	mammal	golden taikn	1	33.68	107.655	2127	2014-09-20	2015-04-24
744	CQ-20140920-69-0031	20140920-69	2014/11/10	17:43:04	mammal	golden taikn	1	33.68	107.655	2127	2014-09-20	2015-04-24
745	CQ-20140920-69-0033	20140920-69	2014/11/15	15:23:02	mammal	golden taikn	1	33.68	107.655	2127	2014-09-20	2015-04-24
746	CQ-20140920-69-0037	20140920-69	2014/11/16	09:29:58	mammal	golden taikn	1	33.68	107.655	2127	2014-09-20	2015-04-24
747	CQ-20140920-69-0041	20140920-69	2014/11/25	08:22:49	mammal	golden taikn	1	33.68	107.655	2127	2014-09-20	2015-04-24
748	CQ-20140920-69-0043	20140920-69	2014/11/27	07:54:21	mammal	golden taikn	1	33.68	107.655	2127	2014-09-20	2015-04-24
749	CQ-20140920-70-0015	20140920-70	2014/9/25	6:41:04	mammal	golden taikn	1	33.6872	107.66	2225	2014-09-20	2015-04-24
750	CQ-20140920-70-0018	20140920-70	2014/09/26	06:46:49	mammal	golden taikn	1	33.6872	107.66	2225	2014-09-20	2015-04-24
751	CQ-20140920-70-0020	20140920-70	2014/09/26	07:57:39	mammal	golden taikn	2	33.6872	107.66	2225	2014-09-20	2015-04-24
752	CQ-20140920-70-0030	20140920-70	2014/09/26	08:56:34	mammal	golden taikn	2	33.6872	107.66	2225	2014-09-20	2015-04-24
753	CQ-20140920-70-0032	20140920-70	2014/09/26	11:03:37	mammal	golden taikn	3	33.6872	107.66	2225	2014-09-20	2015-04-24
754	CQ-20140920-70-0036	20140920-70	2014/09/26	13:06:47	mammal	golden taikn	3	33.6872	107.66	2225	2014-09-20	2015-04-24
755	CQ-20140920-70-0044	20140920-70	2014/10/4	15:13:10	mammal	golden taikn	1	33.6872	107.66	2225	2014-09-20	2015-04-24
756	CQ-20140920-70-0048	20140920-70	2014/10/05	14:14:28	mammal	golden taikn	3	33.6872	107.66	2225	2014-09-20	2015-04-24
757	CQ-20140920-70-0060	20140920-70	2014/10/09	16:22:17	mammal	golden taikn	2	33.6872	107.66	2225	2014-09-20	2015-04-24
758	CQ-20140920-70-0062	20140920-70	2014/10/10	17:03:20	mammal	golden taikn	2	33.6872	107.66	2225	2014-09-20	2015-04-24
759	CQ-20140920-70-0064	20140920-70	2014/10/14	17:20:24	mammal	golden taikn	1	33.6872	107.66	2225	2014-09-20	2015-04-24
760	CQ-20140920-70-0066	20140920-70	2014/10/15	11:18:04	mammal	golden taikn	1	33.6872	107.66	2225	2014-09-20	2015-04-24
761	CQ-20140920-70-0070	20140920-70	2014/10/15	17:27:46	mammal	golden taikn	1	33.6872	107.66	2225	2014-09-20	2015-04-24
762	CQ-20140920-70-0072	20140920-70	2014/10/15	18:48:38	mammal	golden taikn	1	33.6872	107.66	2225	2014-09-20	2015-04-24
763	CQ-20140920-70-0076	20140920-70	2014/10/15	22:40:15	mammal	golden taikn	1	33.6872	107.66	2225	2014-09-20	2015-04-24
764	CQ-20140920-70-0082	20140920-70	2014/10/17	12:27:50	mammal	golden taikn	1	33.6872	107.66	2225	2014-09-20	2015-04-24
765	CQ-20140920-70-0098	20140920-70	2014/10/29	8:58:20	mammal	golden taikn	1	33.6872	107.66	2225	2014-09-20	2015-04-24
766	CQ-20140920-70-0106	20140920-70	2014/11/08	17:55:43	mammal	golden taikn	1	33.6872	107.66	2225	2014-09-20	2015-04-24
767	CQ-20140920-70-0112	20140920-70	2014/11/21	16:05:56	mammal	golden taikn	1	33.6872	107.66	2225	2014-09-20	2015-04-24
768	CQ-20140920-70-0130	20140920-70	2014/11/21	17:58:28	mammal	golden taikn	1	33.6872	107.66	2225	2014-09-20	2015-04-24
769	CQ-20140920-70-0146	20140920-70	2014/12/13	16:19:43	mammal	golden taikn	1	33.6872	107.66	2225	2014-09-20	2015-04-24
770	CQ-20140920-70-0150	20140920-70	2014/12/22	11:48:13	mammal	golden taikn	1	33.6872	107.66	2225	2014-09-20	2015-04-24
771	CQ-20140920-70-0164	20140920-70	2014/12/22	14:04:55	mammal	golden taikn	4	33.6872	107.66	2225	2014-09-20	2015-04-24
772	CQ-20140920-70-0184	20140920-70	2014/12/22	15:35:57	mammal	golden taikn	3	33.6872	107.66	2225	2014-09-20	2015-04-24
773	CQ-20140920-70-0222	20140920-70	2015/2/6	14:10:52	mammal	golden taikn	1	33.6872	107.66	2225	2014-09-20	2015-04-24
774	CQ-20140920-77-0181	20140920-77	2014/11/02	06:59:07	mammal	golden taikn	1	33.6712	107.645	1919	2014-09-20	2015-05-04
775	CQ-20140920-78-0013	20140920-78	2014/10/08	13:19:05	mammal	golden taikn	1	33.6501	107.647	1989	2014-09-20	2015-04-24
776	CQ-20140920-78-0015	20140920-78	2014/10/08	14:54:49	mammal	golden taikn	1	33.6501	107.647	1989	2014-09-20	2015-04-24
777	CQ-20140920-78-0029	20140920-78	2014/10/26	08:27:01	mammal	golden taikn	1	33.6501	107.647	1989	2014-09-20	2015-04-24
778	CQ-20140920-78-0033	20140920-78	2014/10/26	09:32:38	mammal	golden taikn	1	33.6501	107.647	1989	2014-09-20	2015-04-24
779	CQ-20140920-78-0035	20140920-78	2014/10/26	11:24:41	mammal	golden taikn	1	33.6501	107.647	1989	2014-09-20	2015-04-24
780	CQ-20140920-78-0037	20140920-78	2014/10/26	13:27:58	mammal	golden taikn	2	33.6501	107.647	1989	2014-09-20	2015-04-24
781	CQ-20140920-78-0040	20140920-78	2014/10/26	15:20:08	mammal	golden taikn	1	33.6501	107.647	1989	2014-09-20	2015-04-24
782	CQ-20140920-78-0125	20140920-78	2014/10/26	18:45:20	mammal	golden taikn	1	33.6501	107.647	1989	2014-09-20	2015-04-24
783	CQ-20140920-78-0153	20140920-78	2014/10/29	6:48:46	mammal	golden taikn	1	33.6501	107.647	1989	2014-09-20	2015-04-24
784	CQ-20140920-78-0157	20140920-78	2014/10/31	13:38:00	mammal	golden taikn	1	33.6501	107.647	1989	2014-09-20	2015-04-24
785	CQ-20140920-78-0159	20140920-78	2014/11/01	17:08:40	mammal	golden taikn	2	33.6501	107.647	1989	2014-09-20	2015-04-24
786	CQ-20140920-78-0163	20140920-78	2014/11/02	04:09:08	mammal	golden taikn	1	33.6501	107.647	1989	2014-09-20	2015-04-24
787	CQ-20140920-78-0165	20140920-78	2014/11/4	11:37:00	mammal	golden taikn	2	33.6501	107.647	1989	2014-09-20	2015-04-24
788	CQ-20140920-78-0173	20140920-78	2014/11/4	16:38:32	mammal	golden taikn	3	33.6501	107.647	1989	2014-09-20	2015-04-24
789	CQ-20140920-78-0398	20140920-78	2015/04/19	17:41:55	mammal	golden taikn	1	33.6501	107.647	1989	2014-09-20	2015-04-24
790	CQ-20140920-78-0402	20140920-78	2015/04/20	17:59:34	mammal	golden taikn	1	33.6501	107.647	1989	2014-09-20	2015-04-24
791	CQ-20140920-78-0408	20140920-78	2015/04/23	05:57:20	mammal	golden taikn	1	33.6501	107.647	1989	2014-09-20	2015-04-24
792	CQ-20141024-03-0041	20141024-03	2015/03/19	17:18:25	mammal	golden taikn	1	33.4701	107.736	1562	2014-10-24	2015-04-14
793	CQ-20141024-05-0015	20141024-05	2014/11/01	15:25:09	mammal	golden taikn	1	33.4635	107.727	1421	2014-10-24	2015-04-14
794	CQ-20141024-05-0053	20141024-05	2014/11/30	17:20:45	mammal	golden taikn	1	33.4635	107.727	1421	2014-10-24	2015-04-14
795	CQ-20141024-05-0117	20141024-05	2015/01/08	04:10:53	mammal	golden taikn	1	33.4635	107.727	1421	2014-10-24	2015-04-14
796	CQ-20141024-05-0195	20141024-05	2015/04/02	06:23:23	mammal	golden taikn	1	33.4635	107.727	1421	2014-10-24	2015-04-14
797	CQ-20141024-05-0197	20141024-05	2015/04/05	07:24:19	mammal	golden taikn	1	33.4635	107.727	1421	2014-10-24	2015-04-14
798	CQ-20141024-11-0005	20141024-11	2014/12/22	8:08:34	mammal	golden taikn	1	33.5653	107.675	1235	2014-10-24	2015-04-13
799	CQ-20141024-11-0012	20141024-11	2015/2/16	8:05:54	mammal	golden taikn	1	33.5653	107.675	1235	2014-10-24	2015-04-13
800	CQ-20141024-11-0013	20141024-11	2015/2/19	14:38:30	mammal	golden taikn	1	33.5653	107.675	1235	2014-10-24	2015-04-13
801	CQ-20141024-11-0017	20141024-11	2015/2/24	4:42:18	mammal	golden taikn	1	33.5653	107.675	1235	2014-10-24	2015-04-13
802	CQ-20141024-11-0018	20141024-11	2015/3/1	13:56:40	mammal	golden taikn	1	33.5653	107.675	1235	2014-10-24	2015-04-13
803	CQ-20141024-11-0024	20141024-11	2015/3/22	7:51:22	mammal	golden taikn	1	33.5653	107.675	1235	2014-10-24	2015-04-13
804	CQ-20141024-11-0030	20141024-11	2015/4/6	18:49:22	mammal	golden taikn	1	33.5653	107.675	1235	2014-10-24	2015-04-13
805	CQ-20141024-13-0101	20141024-13	2014/11/22	18:59:48	mammal	golden taikn	1	33.5374	107.71	1373	2014-10-24	2015-04-15
806	CQ-20141024-13-0129	20141024-13	2014/11/30	03:42:33	mammal	golden taikn	1	33.5374	107.71	1373	2014-10-24	2015-04-15
807	CQ-20141024-13-0143	20141024-13	2014/12/18	03:03:32	mammal	golden taikn	1	33.5374	107.71	1373	2014-10-24	2015-04-15
808	CQ-20141025-20-0085	20141025-20	2015/02/03	13:35:51	mammal	golden taikn	1	33.589	107.643	1720	2014-10-25	2015-04-16
809	CQ-20141025-38-0043	20141025-38	2014/11/24	16:12:31	mammal	golden taikn	1	33.4802	107.697	1195	2014-10-25	2015-04-17
810	CQ-20141025-38-0044	20141025-38	2014/11/24	16:12:56	mammal	golden taikn	2	33.4802	107.697	1195	2014-10-25	2015-04-17
811	CQ-20141026-55-0192	20141026-55	2014/11/13	16:08:34	mammal	golden taikn	1	33.6584	107.481	1541	2014-10-26	2015-04-26
812	CQ-20141026-55-0194	20141026-55	2014/11/14	15:35:51	mammal	golden taikn	1	33.6584	107.481	1541	2014-10-26	2015-04-26
813	CQ-20141026-55-0232	20141026-55	2015/01/28	17:56:51	mammal	golden taikn	1	33.6584	107.481	1541	2014-10-26	2015-04-26
814	CQ-20141103-35-0005	20141103-35	2015/02/06	10:14:25	mammal	golden taikn	1	33.5922	107.66	1430	2014-11-03	2015-04-16
815	CQ-20141103-35-0009	20141103-35	2015/04/01	17:10:44	mammal	golden taikn	1	33.5922	107.66	1430	2014-11-03	2015-04-16
816	CQ-20141103-37-0021	20141103-37	2014/11/09	14:49:31	mammal	golden taikn	1	33.4982	107.713	1206	2014-11-03	2015-04-14
817	CQ-20141103-37-0071	20141103-37	2014/11/24	08:59:08	mammal	golden taikn	1	33.4982	107.713	1206	2014-11-03	2015-04-14
818	CQ-20141103-37-0093	20141103-37	2014/11/30	20:01:21	mammal	golden taikn	1	33.4982	107.713	1206	2014-11-03	2015-04-14
819	CQ-20141103-37-0095	20141103-37	2014/11/30	21:53:08	mammal	golden taikn	1	33.4982	107.713	1206	2014-11-03	2015-04-14
820	CQ-20141103-37-0099	20141103-37	2014/12/01	17:25:56	mammal	golden taikn	1	33.4982	107.713	1206	2014-11-03	2015-04-14
821	CQ-20141103-37-0111	20141103-37	2014/12/02	20:59:13	mammal	golden taikn	1	33.4982	107.713	1206	2014-11-03	2015-04-14
822	CQ-20141103-37-0119	20141103-37	2014/12/05	09:00:01	mammal	golden taikn	1	33.4982	107.713	1206	2014-11-03	2015-04-14
823	CQ-20141103-37-0121	20141103-37	2014/12/06	01:38:43	mammal	golden taikn	1	33.4982	107.713	1206	2014-11-03	2015-04-14
824	CQ-20141103-37-0127	20141103-37	2014/12/08	16:20:06	mammal	golden taikn	1	33.4982	107.713	1206	2014-11-03	2015-04-14
825	CQ-20141103-37-0135	20141103-37	2014/12/16	01:43:07	mammal	golden taikn	1	33.4982	107.713	1206	2014-11-03	2015-04-14
826	CQ-20141103-37-0239	20141103-37	2015/01/13	18:24:00	mammal	golden taikn	1	33.4982	107.713	1206	2014-11-03	2015-04-14
827	CQ-20141103-37-0245	20141103-37	2015/01/14	09:35:02	mammal	golden taikn	1	33.4982	107.713	1206	2014-11-03	2015-04-14
828	CQ-20141103-37-0265	20141103-37	2015/01/20	09:01:33	mammal	golden taikn	1	33.4982	107.713	1206	2014-11-03	2015-04-14
829	CQ-20141103-37-0269	20141103-37	2015/01/21	22:37:51	mammal	golden taikn	1	33.4982	107.713	1206	2014-11-03	2015-04-14
830	CQ-20141103-37-0277	20141103-37	2015/01/25	18:43:28	mammal	golden taikn	1	33.4982	107.713	1206	2014-11-03	2015-04-14
831	CQ-20141103-37-0279	20141103-37	2015/01/26	08:42:42	mammal	golden taikn	1	33.4982	107.713	1206	2014-11-03	2015-04-14
832	CQ-20141103-37-0341	20141103-37	2015/02/26	09:15:37	mammal	golden taikn	1	33.4982	107.713	1206	2014-11-03	2015-04-14
833	CQ-20141103-37-0345	20141103-37	2015/02/26	18:55:47	mammal	golden taikn	1	33.4982	107.713	1206	2014-11-03	2015-04-14
834	CQ-20141103-37-0351	20141103-37	2015/02/28	18:55:56	mammal	golden taikn	1	33.4982	107.713	1206	2014-11-03	2015-04-14
835	CQ-20141103-37-0359	20141103-37	2015/03/04	13:29:07	mammal	golden taikn	1	33.4982	107.713	1206	2014-11-03	2015-04-14
836	CQ-20141103-37-0399	20141103-37	2015/03/15	01:16:39	mammal	golden taikn	1	33.4982	107.713	1206	2014-11-03	2015-04-14
837	CQ-20141103-37-0409	20141103-37	2015/03/18	17:53:40	mammal	golden taikn	1	33.4982	107.713	1206	2014-11-03	2015-04-14
838	CQ-20141103-37-0459	20141103-37	2015/03/26	18:59:19	mammal	golden taikn	1	33.4982	107.713	1206	2014-11-03	2015-04-14
839	CQ-20141103-37-0465	20141103-37	2015/03/27	08:01:59	mammal	golden taikn	1	33.4982	107.713	1206	2014-11-03	2015-04-14
840	CQ-20141103-37-0467	20141103-37	2015/03/27	17:56:00	mammal	golden taikn	1	33.4982	107.713	1206	2014-11-03	2015-04-14
841	CQ-20141103-37-0471	20141103-37	2015/03/27	23:06:36	mammal	golden taikn	1	33.4982	107.713	1206	2014-11-03	2015-04-14
842	CQ-20141104-36-0125	20141104-36	2015/03/26	07:18:43	mammal	golden taikn	1	33.5723	107.714	1812	2014-11-04	2015-04-16
843	CQ-20141104-46-0046	20141104-46	2014/11/10	02:25:41	mammal	golden taikn	1	33.5947	107.703	1307	2014-11-04	2015-04-16
844	CQ-20141106-07-0024	20141106-07	2014/11/18	07:15:34	mammal	golden taikn	1	33.6054	107.686	1450	2014-11-06	2015-04-21
845	CQ-20141106-07-0098	20141106-07	2015/04/08	08:14:43	mammal	golden taikn	1	33.6054	107.686	1450	2014-11-06	2015-04-21
846	CQ-20141106-14-0005	20141106-14	2014/11/15	08:37:17	mammal	golden taikn	1	33.5535	107.644	1442	2014-11-06	2015-04-15
847	CQ-20141106-14-0009	20141106-14	2014/11/17	15:14:16	mammal	golden taikn	1	33.5535	107.644	1442	2014-11-06	2015-04-15
848	CQ-20141106-14-0065	20141106-14	2014/12/08	12:07:30	mammal	golden taikn	1	33.5535	107.644	1442	2014-11-06	2015-04-15
849	CQ-20141106-14-0172	20141106-14	2015/02/01	16:20:57	mammal	golden taikn	1	33.5535	107.644	1442	2014-11-06	2015-04-15
850	CQ-20141106-14-0312	20141106-14	2015/04/07	07:27:07	mammal	golden taikn	1	33.5535	107.644	1442	2014-11-06	2015-04-15
851	CQ-20141106-14-0316	20141106-14	2015/04/07	16:21:58	mammal	golden taikn	1	33.5535	107.644	1442	2014-11-06	2015-04-15
852	CQ-20141106-14-0320	20141106-14	2015/04/07	17:53:31	mammal	golden taikn	2	33.5535	107.644	1442	2014-11-06	2015-04-15
853	CQ-20141106-14-0322	20141106-14	2015/04/07	19:20:13	mammal	golden taikn	1	33.5535	107.644	1442	2014-11-06	2015-04-15
854	CQ-20141106-14-0326	20141106-14	2015/04/08	07:19:53	mammal	golden taikn	1	33.5535	107.644	1442	2014-11-06	2015-04-15
855	CQ-20141115-101-0005	20141115-101	2014/11/17	07:01:55	mammal	golden taikn	1	33.6403	107.449	1526	2014-11-15	2015-04-13
856	CQ-20141115-101-0197	20141115-101	2015/03/19	04:26:40	mammal	golden taikn	1	33.6403	107.449	1526	2014-11-15	2015-04-13
857	CQ-20141115-101-0199	20141115-101	2015/03/20	08:31:40	mammal	golden taikn	1	33.6403	107.449	1526	2014-11-15	2015-04-13
858	CQ-20141115-101-0211	20141115-101	2015/3/25	5:33:16	mammal	golden taikn	1	33.6403	107.449	1526	2014-11-15	2015-04-13
859	CQ-20141115-101-0221	20141115-101	2015/04/07	10:11:40	mammal	golden taikn	1	33.6403	107.449	1526	2014-11-15	2015-04-13
860	CQ-20141115-52-0011	20141115-52	2014/11/19	3:28:58	mammal	golden taikn	2	33.6352	107.473	1520	2014-11-15	2015-04-12
861	CQ-20141115-52-0013	20141115-52	2014/11/29	18:49:16	mammal	golden taikn	1	33.6352	107.473	1520	2014-11-15	2015-04-12
862	CQ-20141115-52-0015	20141115-52	2014/11/30	03:10:27	mammal	golden taikn	1	33.6352	107.473	1520	2014-11-15	2015-04-12
863	CQ-20141115-52-0017	20141115-52	2014/12/06	12:39:45	mammal	golden taikn	1	33.6352	107.473	1520	2014-11-15	2015-04-12
864	CQ-20141115-52-0019	20141115-52	2014/12/06	14:02:15	mammal	golden taikn	1	33.6352	107.473	1520	2014-11-15	2015-04-12
865	CQ-20141115-52-0031	20141115-52	2014/12/21	19:06:10	mammal	golden taikn	1	33.6352	107.473	1520	2014-11-15	2015-04-12
866	CQ-20141115-52-0033	20141115-52	2014/12/21	23:30:27	mammal	golden taikn	1	33.6352	107.473	1520	2014-11-15	2015-04-12
867	CQ-20141115-52-0061	20141115-52	2015/03/31	05:26:15	mammal	golden taikn	1	33.6352	107.473	1520	2014-11-15	2015-04-12
868	CQ-20141115-52-0065	20141115-52	42101	1:25:38	mammal	golden taikn	1	33.6352	107.473	1520	2014-11-15	2015-04-12
869	CQ-20141115-52-0067	20141115-52	2015/04/10	04:25:09	mammal	golden taikn	1	33.6352	107.473	1520	2014-11-15	2015-04-12
870	CQ-20141115-57-0117	20141115-57	2014/12/09	15:41:28	mammal	golden taikn	1	33.6257	107.473	1681	2014-11-15	2015-04-12
871	CQ-20141115-59-0029	20141115-59	2015/01/28	06:14:24	mammal	golden taikn	1	33.6211	107.44	1661	2014-11-15	2015-04-15
872	CQ-20141115-59-0092	20141115-59	2015/03/27	13:59:02	mammal	golden taikn	1	33.6211	107.44	1661	2014-11-15	2015-04-15
873	CQ-20141117-30-0015	20141117-30	2014/12/10	15:15:16	mammal	golden taikn	1	33.6105	107.665	1500	2014-11-17	2015-04-27
874	CQ-20141117-31-0007	20141117-31	2014/11/24	15:14:15	mammal	golden taikn	1	33.6232	107.66	1655	2014-11-18	2015-04-27
875	CQ-20141117-31-0011	20141117-31	2014/11/24	16:05:40	mammal	golden taikn	1	33.6232	107.66	1655	2014-11-18	2015-04-27
876	CQ-20141117-31-0015	20141117-31	2014/12/01	08:22:51	mammal	golden taikn	1	33.6232	107.66	1655	2014-11-18	2015-04-27
877	CQ-20141117-31-0027	20141117-31	2014/12/01	09:19:12	mammal	golden taikn	1	33.6232	107.66	1655	2014-11-18	2015-04-27
878	CQ-20141117-31-0045	20141117-31	2015/04/02	01:15:03	mammal	golden taikn	1	33.6232	107.66	1655	2014-11-18	2015-04-27
879	CQ-20141117-31-0051	20141117-31	2015/04/02	18:46:29	mammal	golden taikn	1	33.6232	107.66	1655	2014-11-18	2015-04-27
880	CQ-20141117-31-0055	20141117-31	2015/04/10	23:06:19	mammal	golden taikn	1	33.6232	107.66	1655	2014-11-18	2015-04-27
881	CQ-20141117-31-0057	20141117-31	2015/04/15	18:33:49	mammal	golden taikn	3	33.6232	107.66	1655	2014-11-18	2015-04-27
882	CQ-20141117-31-0059	20141117-31	2015/04/18	00:09:29	mammal	golden taikn	1	33.6232	107.66	1655	2014-11-18	2015-04-27
883	CQ-20141117-31-0066	20141117-31	2015/4/20	23:37:44	mammal	golden taikn	1	33.6232	107.66	1655	2014-11-18	2015-04-27
884	CQ-20141118-26-0009	20141118-26	2015/01/15	15:37:47	mammal	golden taikn	3	33.6403	107.669	2040	2014-11-18	2015-04-28
885	CQ-20141118-26-0011	20141118-26	2015/01/15	18:49:49	mammal	golden taikn	2	33.6403	107.669	2040	2014-11-18	2015-04-28
886	CQ-20141118-26-0013	20141118-26	2015/02/06	10:41:43	mammal	golden taikn	2	33.6403	107.669	2040	2014-11-18	2015-04-28
887	CQ-20141118-26-0015	20141118-26	2015/02/06	11:14:54	mammal	golden taikn	4	33.6403	107.669	2040	2014-11-18	2015-04-28
888	CQ-20141118-26-0017	20141118-26	2015/02/09	15:22:46	mammal	golden taikn	4	33.6403	107.669	2040	2014-11-18	2015-04-28
889	CQ-20141118-26-0037	20141118-26	2015/02/27	16:20:31	mammal	golden taikn	1	33.6403	107.669	2040	2014-11-18	2015-04-28
890	CQ-20141118-26-0041	20141118-26	2015/02/28	11:18:04	mammal	golden taikn	1	33.6403	107.669	2040	2014-11-18	2015-04-28
891	CQ-20141118-26-0043	20141118-26	2015/02/28	17:40:00	mammal	golden taikn	1	33.6403	107.669	2040	2014-11-18	2015-04-28
892	CQ-20141118-26-0047	20141118-26	2015/03/01	09:29:54	mammal	golden taikn	3	33.6403	107.669	2040	2014-11-18	2015-04-28
893	CQ-20141118-26-0051	20141118-26	2015/03/01	10:09:18	mammal	golden taikn	2	33.6403	107.669	2040	2014-11-18	2015-04-28
894	CQ-20141118-26-0053	20141118-26	2015/03/01	12:26:25	mammal	golden taikn	1	33.6403	107.669	2040	2014-11-18	2015-04-28
895	CQ-20141118-26-0055	20141118-26	2015/03/01	18:04:50	mammal	golden taikn	1	33.6403	107.669	2040	2014-11-18	2015-04-28
896	CQ-20141118-26-0061	20141118-26	2015/03/02	16:40:16	mammal	golden taikn	2	33.6403	107.669	2040	2014-11-18	2015-04-28
897	CQ-20141118-26-0063	20141118-26	2015/03/06	07:58:47	mammal	golden taikn	1	33.6403	107.669	2040	2014-11-18	2015-04-28
898	CQ-20141118-34-0007	20141118-34	2015/01/02	15:21:10	mammal	golden taikn	1	33.6409	107.671	1960	2014-11-18	2015-04-28
899	CQ-20141118-34-0009	20141118-34	2015/01/15	12:47:27	mammal	golden taikn	1	33.6409	107.671	1960	2014-11-18	2015-04-28
900	CQ-20141121-103-0011	20141121-103	2014/12/04	15:23:00	mammal	golden taikn	1	33.6831	107.501	1821	2014-11-21	2015-04-23
901	CQ-20141121-103-0015	20141121-103	2014/12/04	16:02:41	mammal	golden taikn	1	33.6831	107.501	1821	2014-11-21	2015-04-23
902	CQ-20141121-103-0025	20141121-103	2014/12/13	18:52:52	mammal	golden taikn	1	33.6831	107.501	1821	2014-11-21	2015-04-23
903	CQ-20141121-103-0029	20141121-103	2014/12/16	11:35:31	mammal	golden taikn	1	33.6831	107.501	1821	2014-11-21	2015-04-23
904	CQ-20141121-103-0105	20141121-103	2015/4/9	18:25:16	mammal	golden taikn	1	33.6831	107.501	1821	2014-11-21	2015-04-23
905	CQ-20141121-58-0005	20141121-58	2014/12/04	0.573924	mammal	golden taikn	1	33.6757	107.495	1610	2014-11-21	2015-04-22
906	CQ-20141121-58-0009	20141121-58	2014/12/14	15:43:16	mammal	golden taikn	1	33.6757	107.495	1610	2014-11-21	2015-04-22
907	CQ-20141121-58-0011	20141121-58	2014/12/15	10:48:33	mammal	golden taikn	1	33.6757	107.495	1610	2014-11-21	2015-04-22
908	CQ-20141121-58-0049	20141121-58	2015/01/20	17:14:33	mammal	golden taikn	1	33.6757	107.495	1610	2014-11-21	2015-04-22
909	CQ-20150115-44-0056	20150415-44	2015/4/21	23:43:32	mammal	golden taikn	1	33.6179	107.686	1373	2015-04-15	2015-10-10
910	CQ-20150115-44-0059	20150415-44	2015/04/22	03:01:52	mammal	golden taikn	1	33.6179	107.686	1373	2015-04-15	2015-10-10
911	CQ-20150115-44-0073	20150415-44	2015/04/22	06:00:09	mammal	golden taikn	1	33.6179	107.686	1373	2015-04-15	2015-10-10
912	CQ-20150115-44-0089	20150415-44	2015/04/24	03:32:28	mammal	golden taikn	1	33.6179	107.686	1373	2015-04-15	2015-10-10
913	CQ-20150115-44-0111	20150415-44	2015/04/25	11:44:35	mammal	golden taikn	1	33.6179	107.686	1373	2015-04-15	2015-10-10
914	CQ-20150115-44-0729	20150415-44	2015/08/28	08:35:52	mammal	golden taikn	1	33.6179	107.686	1373	2015-04-15	2015-10-10
915	CQ-20150115-44-0749	20150415-44	2015/08/29	09:31:24	mammal	golden taikn	1	33.6179	107.686	1373	2015-04-15	2015-10-10
916	CQ-20150412-68-0194	20150412-68	2015/08/06	14:59:32	mammal	golden taikn	1	33.6854	107.534	2437	2015-04-12	2015-10-10
917	CQ-20150412-68-0247	20150412-68	2015/09/04	18:16:50	mammal	golden taikn	1	33.6854	107.534	2437	2015-04-12	2015-10-10
918	CQ-20150412-68-0263	20150412-68	2015/09/17	08:40:41	mammal	golden taikn	1	33.6854	107.534	2437	2015-04-12	2015-10-10
919	CQ-20150412-68-0273	20150412-68	2015/09/21	00:56:40	mammal	golden taikn	1	33.6854	107.534	2437	2015-04-12	2015-10-10
920	CQ-20150412-68-0305	20150412-68	2015/09/21	01:47:12	mammal	golden taikn	1	33.6854	107.534	2437	2015-04-12	2015-10-10
921	CQ-20150412-68-0323	20150412-68	2015/09/21	02:25:07	mammal	golden taikn	1	33.6854	107.534	2437	2015-04-12	2015-10-10
922	CQ-20150412-68-0324	20150412-68	2015/09/23	14:40:33	mammal	golden taikn	1	33.6854	107.534	2437	2015-04-12	2015-10-10
923	CQ-20150412-68-0327	20150412-68	2015/10/07	15:59:30	mammal	golden taikn	1	33.6854	107.534	2437	2015-04-12	2015-10-10
924	CQ-20150412-83-0022	20150412-83	2015/4/30	6:30:26	mammal	golden taikn	1	33.6629	107.544	1696	2015-04-12	2015-10-10
925	CQ-20150412-83-0023	20150412-83	2015/04/30	19:25:04	mammal	golden taikn	1	33.6629	107.544	1696	2015-04-12	2015-10-10
926	CQ-20150412-83-0029	20150412-83	2015/05/01	04:20:37	mammal	golden taikn	1	33.6629	107.544	1696	2015-04-12	2015-10-10
927	CQ-20150412-83-0035	20150412-83	2015/05/04	02:21:14	mammal	golden taikn	1	33.6629	107.544	1696	2015-04-12	2015-10-10
928	CQ-20150412-83-0037	20150412-83	2015/05/04	06:14:39	mammal	golden taikn	1	33.6629	107.544	1696	2015-04-12	2015-10-10
929	CQ-20150412-83-0051	20150412-83	2015/06/03	08:57:14	mammal	golden taikn	1	33.6629	107.544	1696	2015-04-12	2015-10-10
930	CQ-20150412-83-1047	20150412-83	2015/09/19	13:05:12	mammal	golden taikn	1	33.6629	107.544	1696	2015-04-12	2015-10-10
931	CQ-20150412-83-1049	20150412-83	2015/09/19	17:29:56	mammal	golden taikn	1	33.6629	107.544	1696	2015-04-12	2015-10-10
932	CQ-20150412-83-1052	20150412-83	2015/9/20	6:12:24	mammal	golden taikn	1	33.6629	107.544	1696	2015-04-12	2015-10-10
933	CQ-20150412-83-1053	20150412-83	2015/09/20	06:57:02	mammal	golden taikn	1	33.6629	107.544	1696	2015-04-12	2015-10-10
934	CQ-20150412-83-1059	20150412-83	2015/09/21	18:11:08	mammal	golden taikn	1	33.6629	107.544	1696	2015-04-12	2015-10-10
935	CQ-20150412-83-1063	20150412-83	2015/09/22	05:46:18	mammal	golden taikn	1	33.6629	107.544	1696	2015-04-12	2015-10-10
936	CQ-20150412-83-1065	20150412-83	2015/09/24	23:00:36	mammal	golden taikn	1	33.6629	107.544	1696	2015-04-12	2015-10-10
937	CQ-20150412-83-1075	20150412-83	2015/09/25	06:15:18	mammal	golden taikn	1	33.6629	107.544	1696	2015-04-12	2015-10-10
938	CQ-20150412-83-1087	20150412-83	2015/10/06	14:44:22	mammal	golden taikn	1	33.6629	107.544	1696	2015-04-12	2015-10-10
939	CQ-20150412-83-1089	20150412-83	2015/10/06	22:00:27	mammal	golden taikn	1	33.6629	107.544	1696	2015-04-12	2015-10-10
940	CQ-20150412-83-1093	20150412-83	2015/10/07	16:41:18	mammal	golden taikn	1	33.6629	107.544	1696	2015-04-12	2015-10-10
941	CQ-20150412-83-1099	20150412-83	2015/10/10	06:13:32	mammal	golden taikn	1	33.6629	107.544	1696	2015-04-12	2015-10-10
942	CQ-20150412-84-0101	20150412-84	2015/04/24	16:43:03	mammal	golden taikn	1	33.6901	107.57	1930	2015-04-12	2015-10-10
943	CQ-20150412-84-0103	20150412-84	2015/04/24	18:13:24	mammal	golden taikn	1	33.6901	107.57	1930	2015-04-12	2015-10-10
944	CQ-20150412-84-0129	20150412-84	2015/04/25	06:06:57	mammal	golden taikn	1	33.6901	107.57	1930	2015-04-12	2015-10-10
945	CQ-20150412-84-0133	20150412-84	2015/04/25	07:26:02	mammal	golden taikn	1	33.6901	107.57	1930	2015-04-12	2015-10-10
946	CQ-20150412-84-0137	20150412-84	2015/04/25	08:05:37	mammal	golden taikn	1	33.6901	107.57	1930	2015-04-12	2015-10-10
947	CQ-20150412-84-0139	20150412-84	2015/04/25	11:01:57	mammal	golden taikn	1	33.6901	107.57	1930	2015-04-12	2015-10-10
948	CQ-20150412-84-0311	20150412-84	2015/08/19	07:32:55	mammal	golden taikn	1	33.6901	107.57	1930	2015-04-12	2015-10-10
949	CQ-20150412-84-0387	20150412-84	2015/09/11	13:25:21	mammal	golden taikn	1	33.6901	107.57	1930	2015-04-12	2015-10-10
950	CQ-20150412-84-0393	20150412-84	2015/09/17	15:19:02	mammal	golden taikn	1	33.6901	107.57	1930	2015-04-12	2015-10-10
951	CQ-20150412-84-0395	20150412-84	2015/09/17	15:52:27	mammal	golden taikn	1	33.6901	107.57	1930	2015-04-12	2015-10-10
952	CQ-20150412-84-0397	20150412-84	2015/09/17	17:04:10	mammal	golden taikn	1	33.6901	107.57	1930	2015-04-12	2015-10-10
953	CQ-20150412-84-0401	20150412-84	2015/09/18	08:46:08	mammal	golden taikn	1	33.6901	107.57	1930	2015-04-12	2015-10-10
954	CQ-20150413-52-0003	20150413-52	2015/04/15	21:22:00	mammal	golden taikn	1	33.6368	107.464	1424	2015-04-13	2015-10-11
955	CQ-20150413-53-0144	20150413-53	2015/07/06	06:44:03	mammal	golden taikn	1	33.652	107.461	1677	2015-04-13	2015-10-11
956	CQ-20150413-53-0146	20150413-53	2015/07/10	12:02:00	mammal	golden taikn	1	33.652	107.461	1677	2015-04-13	2015-10-11
957	CQ-20150413-53-0234	20150413-53	2015/09/09	05:37:42	mammal	golden taikn	1	33.652	107.461	1677	2015-04-13	2015-10-11
958	CQ-20150413-53-0238	20150413-53	2015/09/09	20:50:39	mammal	golden taikn	1	33.652	107.461	1677	2015-04-13	2015-10-11
959	CQ-20150413-53-0240	20150413-53	2015/09/10	18:37:05	mammal	golden taikn	1	33.652	107.461	1677	2015-04-13	2015-10-11
960	CQ-20150413-53-0252	20150413-53	2015/09/15	05:11:53	mammal	golden taikn	2	33.652	107.461	1677	2015-04-13	2015-10-11
961	CQ-20150413-53-0256	20150413-53	2015/09/15	19:48:18	mammal	golden taikn	1	33.652	107.461	1677	2015-04-13	2015-10-11
962	CQ-20150413-53-0258	20150413-53	2015/09/16	05:21:56	mammal	golden taikn	1	33.652	107.461	1677	2015-04-13	2015-10-11
963	CQ-20150413-53-0262	20150413-53	2015/09/21	00:23:39	mammal	golden taikn	1	33.652	107.461	1677	2015-04-13	2015-10-11
964	CQ-20150413-53-0266	20150413-53	2015/09/30	02:26:46	mammal	golden taikn	3	33.652	107.461	1677	2015-04-13	2015-10-11
965	CQ-20150413-54-0021	20150413-54	2015/05/18	11:48:13	mammal	golden taikn	1	33.714	107.598	2927	2015-04-12	2015-10-10
966	CQ-20150413-54-0025	20150413-54	2015/05/30	12:08:11	mammal	golden taikn	1	33.714	107.598	2927	2015-04-12	2015-10-10
967	CQ-20150413-54-0031	20150413-54	2015/06/29	10:56:56	mammal	golden taikn	1	33.714	107.598	2927	2015-04-12	2015-10-10
968	CQ-20150413-54-0033	20150413-54	2015/06/29	16:18:05	mammal	golden taikn	1	33.714	107.598	2927	2015-04-12	2015-10-10
969	CQ-20150413-54-0041	20150413-54	2015/06/29	17:28:01	mammal	golden taikn	1	33.714	107.598	2927	2015-04-12	2015-10-10
970	CQ-20150413-54-0043	20150413-54	2015/06/30	02:12:25	mammal	golden taikn	1	33.714	107.598	2927	2015-04-12	2015-10-10
971	CQ-20150413-54-0045	20150413-54	2015/07/05	11:45:31	mammal	golden taikn	1	33.714	107.598	2927	2015-04-12	2015-10-10
972	CQ-20150413-54-0047	20150413-54	2015/07/15	14:35:15	mammal	golden taikn	1	33.714	107.598	2927	2015-04-12	2015-10-10
973	CQ-20150413-54-0057	20150413-54	2015/09/28	17:27:24	mammal	golden taikn	1	33.714	107.598	2927	2015-04-12	2015-10-10
974	CQ-20150413-54-0059	20150413-54	2015/10/01	02:38:29	mammal	golden taikn	1	33.714	107.598	2927	2015-04-12	2015-10-10
975	CQ-20150413-54-0061	20150413-54	2015/10/03	01:18:48	mammal	golden taikn	2	33.714	107.598	2927	2015-04-12	2015-10-10
976	CQ-20150414-37-0005	20150414-37	2015/04/15	01:02:38	mammal	golden taikn	1	33.5685	107.705	0	2015-04-14	2015-10-21
977	CQ-20150414-37-0665	20150414-37	2015/09/30	17:52:27	mammal	golden taikn	1	33.5685	107.705	0	2015-04-14	2015-10-21
978	CQ-20150414-57-0097	20150414-57	2015/08/03	16:46:34	mammal	golden taikn	1	33.6635	107.496	1764	2015-04-14	2015-10-16
979	CQ-20150414-57-0103	20150414-57	2015/08/03	17:51:56	mammal	golden taikn	1	33.6635	107.496	1764	2015-04-14	2015-10-16
980	CQ-20150414-79-0016	20150414-79	2015/5/1	8:32:56	mammal	golden taikn	1	33.6937	107.641	2369	2015-04-14	2015-10-11
981	CQ-20150414-79-0077	20150414-79	2015/06/02	09:11:18	mammal	golden taikn	1	33.6937	107.641	2369	2015-04-14	2015-10-11
982	CQ-20150414-79-0087	20150414-79	2015/06/03	10:55:04	mammal	golden taikn	1	33.6937	107.641	2369	2015-04-14	2015-10-11
983	CQ-20150414-79-0117	20150414-79	2015/06/10	05:59:24	mammal	golden taikn	1	33.6937	107.641	2369	2015-04-14	2015-10-11
984	CQ-20150414-79-0260	20150414-79	2015/08/30	22:01:40	mammal	golden taikn	1	33.6937	107.641	2369	2015-04-14	2015-10-11
985	CQ-20150414-79-0266	20150414-79	2015/09/05	16:24:24	mammal	golden taikn	1	33.6937	107.641	2369	2015-04-14	2015-10-11
986	CQ-20150414-79-0272	20150414-79	2015/09/12	10:43:16	mammal	golden taikn	1	33.6937	107.641	2369	2015-04-14	2015-10-11
987	CQ-20150414-79-0280	20150414-79	2015/09/21	15:35:39	mammal	golden taikn	1	33.6937	107.641	2369	2015-04-14	2015-10-11
988	CQ-20150414-88-0009	20150414-88	2015/04/24	18:17:09	mammal	golden taikn	1	33.6946	107.619	2138	2015-04-14	2015-10-11
989	CQ-20150414-88-0017	20150414-88	2015/04/29	19:37:26	mammal	golden taikn	1	33.6946	107.619	2138	2015-04-14	2015-10-11
990	CQ-20150414-88-0019	20150414-88	2015/04/30	01:41:02	mammal	golden taikn	1	33.6946	107.619	2138	2015-04-14	2015-10-11
991	CQ-20150414-88-0021	20150414-88	2015/04/30	06:35:53	mammal	golden taikn	1	33.6946	107.619	2138	2015-04-14	2015-10-11
992	CQ-20150414-88-0023	20150414-88	2015/04/30	17:25:38	mammal	golden taikn	1	33.6946	107.619	2138	2015-04-14	2015-10-11
993	CQ-20150414-88-0027	20150414-88	2015/05/02	17:47:50	mammal	golden taikn	1	33.6946	107.619	2138	2015-04-14	2015-10-11
994	CQ-20150414-88-0111	20150414-88	2015/09/10	08:16:21	mammal	golden taikn	1	33.6946	107.619	2138	2015-04-14	2015-10-11
995	CQ-20150414-88-0113	20150414-88	2015/09/10	16:59:16	mammal	golden taikn	1	33.6946	107.619	2138	2015-04-14	2015-10-11
996	CQ-20150414-88-0141	20150414-88	2015/09/19	19:16:58	mammal	golden taikn	1	33.6946	107.619	2138	2015-04-14	2015-10-11
997	CQ-20150414-88-0143	20150414-88	2015/09/21	07:25:32	mammal	golden taikn	1	33.6946	107.619	2138	2015-04-14	2015-10-11
998	CQ-20150414-88-0155	20150414-88	2015/10/02	03:14:14	mammal	golden taikn	1	33.6946	107.619	2138	2015-04-14	2015-10-11
999	CQ-20150414-95-0015	20150414-95	2015/04/25	19:09:24	mammal	golden taikn	1	33.7055	107.612	2322	2015-04-14	2015-10-11
1000	CQ-20150414-95-0038	20150414-95	2015/05/07	14:45:40	mammal	golden taikn	1	33.7055	107.612	2322	2015-04-14	2015-10-11
1001	CQ-20150414-95-0044	20150414-95	2015/05/08	07:57:29	mammal	golden taikn	1	33.7055	107.612	2322	2015-04-14	2015-10-11
1002	CQ-20150414-95-0048	20150414-95	2015/05/08	19:54:39	mammal	golden taikn	1	33.7055	107.612	2322	2015-04-14	2015-10-11
1003	CQ-20150414-95-0062	20150414-95	2015/05/12	16:36:51	mammal	golden taikn	1	33.7055	107.612	2322	2015-04-14	2015-10-11
1004	CQ-20150414-95-0070	20150414-95	2015/05/14	17:49:49	mammal	golden taikn	1	33.7055	107.612	2322	2015-04-14	2015-10-11
1005	CQ-20150414-95-0114	20150414-95	2015/06/03	17:10:17	mammal	golden taikn	1	33.7055	107.612	2322	2015-04-14	2015-10-11
1006	CQ-20150414-95-0116	20150414-95	2015/06/04	08:06:33	mammal	golden taikn	1	33.7055	107.612	2322	2015-04-14	2015-10-11
1007	CQ-20150414-95-0305	20150414-95	2015/08/17	08:39:33	mammal	golden taikn	1	33.7055	107.612	2322	2015-04-14	2015-10-11
1008	CQ-20150414-95-0311	20150414-95	2015/08/20	01:35:35	mammal	golden taikn	1	33.7055	107.612	2322	2015-04-14	2015-10-11
1009	CQ-20150414-95-0313	20150414-95	2015/08/21	07:34:51	mammal	golden taikn	1	33.7055	107.612	2322	2015-04-14	2015-10-11
1010	CQ-20150414-95-0315	20150414-95	2015/08/21	08:12:39	mammal	golden taikn	1	33.7055	107.612	2322	2015-04-14	2015-10-11
1011	CQ-20150414-95-0323	20150414-95	2015/08/22	17:31:45	mammal	golden taikn	1	33.7055	107.612	2322	2015-04-14	2015-10-11
1012	CQ-20150414-95-0327	20150414-95	2015/08/23	07:04:43	mammal	golden taikn	1	33.7055	107.612	2322	2015-04-14	2015-10-11
1013	CQ-20150414-95-0345	20150414-95	2015/08/28	05:54:31	mammal	golden taikn	1	33.7055	107.612	2322	2015-04-14	2015-10-11
1014	CQ-20150414-95-0349	20150414-95	2015/08/28	07:13:14	mammal	golden taikn	1	33.7055	107.612	2322	2015-04-14	2015-10-11
1015	CQ-20150414-95-0359	20150414-95	2015/08/28	08:27:55	mammal	golden taikn	1	33.7055	107.612	2322	2015-04-14	2015-10-11
1016	CQ-20150414-95-0361	20150414-95	2015/08/28	09:00:34	mammal	golden taikn	1	33.7055	107.612	2322	2015-04-14	2015-10-11
1017	CQ-20150414-95-0363	20150414-95	2015/08/28	09:38:58	mammal	golden taikn	1	33.7055	107.612	2322	2015-04-14	2015-10-11
1018	CQ-20150414-95-0373	20150414-95	2015/09/01	07:56:40	mammal	golden taikn	1	33.7055	107.612	2322	2015-04-14	2015-10-11
1019	CQ-20150414-95-0375	20150414-95	2015/09/01	23:14:50	mammal	golden taikn	1	33.7055	107.612	2322	2015-04-14	2015-10-11
1020	CQ-20150414-95-0381	20150414-95	2015/09/02	18:06:15	mammal	golden taikn	1	33.7055	107.612	2322	2015-04-14	2015-10-11
1021	CQ-20150414-95-0393	20150414-95	2015/09/06	11:59:25	mammal	golden taikn	1	33.7055	107.612	2322	2015-04-14	2015-10-11
1022	CQ-20150414-95-0401	20150414-95	2015/09/06	19:52:06	mammal	golden taikn	1	33.7055	107.612	2322	2015-04-14	2015-10-11
1023	CQ-20150414-95-0415	20150414-95	2015/09/14	21:19:01	mammal	golden taikn	1	33.7055	107.612	2322	2015-04-14	2015-10-11
1024	CQ-20150414-95-0419	20150414-95	2015/09/15	00:36:40	mammal	golden taikn	1	33.7055	107.612	2322	2015-04-14	2015-10-11
1025	CQ-20150414-95-0433	20150414-95	2015/09/19	16:54:54	mammal	golden taikn	1	33.7055	107.612	2322	2015-04-14	2015-10-11
1026	CQ-20150414-95-0435	20150414-95	2015/09/20	02:07:32	mammal	golden taikn	1	33.7055	107.612	2322	2015-04-14	2015-10-11
1027	CQ-20150414-95-0441	20150414-95	2015/09/23	15:55:17	mammal	golden taikn	1	33.7055	107.612	2322	2015-04-14	2015-10-11
1028	CQ-20150414-95-0461	20150414-95	2015/10/02	19:08:39	mammal	golden taikn	1	33.7055	107.612	2322	2015-04-14	2015-10-11
1029	CQ-20150414-99-0039	20150414-99	2015/05/24	05:27:19	mammal	golden taikn	1	33.7053	107.632	2388	2015-04-14	2015-10-11
1030	CQ-20150414-99-0047	20150414-99	2015/06/02	19:58:29	mammal	golden taikn	1	33.7053	107.632	2388	2015-04-14	2015-10-11
1031	CQ-20150414-99-0051	20150414-99	2015/06/03	06:10:31	mammal	golden taikn	1	33.7053	107.632	2388	2015-04-14	2015-10-11
1032	CQ-20150414-99-0054	20150414-99	2015/6/3	9:32:24	mammal	golden taikn	1	33.7053	107.632	2388	2015-04-14	2015-10-11
1033	CQ-20150414-99-0057	20150414-99	2015/06/03	14:55:44	mammal	golden taikn	1	33.7053	107.632	2388	2015-04-14	2015-10-11
1034	CQ-20150414-99-0063	20150414-99	2015/06/03	17:10:53	mammal	golden taikn	1	33.7053	107.632	2388	2015-04-14	2015-10-11
1035	CQ-20150414-99-0071	20150414-99	2015/06/05	19:02:01	mammal	golden taikn	1	33.7053	107.632	2388	2015-04-14	2015-10-11
1036	CQ-20150414-99-0089	20150414-99	2015/06/16	16:22:43	mammal	golden taikn	1	33.7053	107.632	2388	2015-04-14	2015-10-11
1037	CQ-20150414-99-0091	20150414-99	2015/06/20	07:25:21	mammal	golden taikn	1	33.7053	107.632	2388	2015-04-14	2015-10-11
1038	CQ-20150414-99-0123	20150414-99	2015/06/21	07:36:13	mammal	golden taikn	1	33.7053	107.632	2388	2015-04-14	2015-10-11
1039	CQ-20150414-99-0129	20150414-99	2015/06/27	06:55:46	mammal	golden taikn	1	33.7053	107.632	2388	2015-04-14	2015-10-11
1040	CQ-20150414-99-0131	20150414-99	2015/06/28	10:16:22	mammal	golden taikn	2	33.7053	107.632	2388	2015-04-14	2015-10-11
1041	CQ-20150414-99-0133	20150414-99	2015/06/28	11:22:39	mammal	golden taikn	1	33.7053	107.632	2388	2015-04-14	2015-10-11
1042	CQ-20150414-99-0135	20150414-99	2015/06/28	11:54:31	mammal	golden taikn	1	33.7053	107.632	2388	2015-04-14	2015-10-11
1043	CQ-20150414-99-0137	20150414-99	2015/07/01	08:11:14	mammal	golden taikn	1	33.7053	107.632	2388	2015-04-14	2015-10-11
1044	CQ-20150414-99-0141	20150414-99	2015/07/04	06:54:56	mammal	golden taikn	1	33.7053	107.632	2388	2015-04-14	2015-10-11
1045	CQ-20150414-99-0143	20150414-99	2015/07/04	18:50:58	mammal	golden taikn	1	33.7053	107.632	2388	2015-04-14	2015-10-11
1046	CQ-20150414-99-0145	20150414-99	2015/07/05	02:21:30	mammal	golden taikn	1	33.7053	107.632	2388	2015-04-14	2015-10-11
1047	CQ-20150414-99-0149	20150414-99	2015/07/06	05:22:18	mammal	golden taikn	1	33.7053	107.632	2388	2015-04-14	2015-10-11
1048	CQ-20150414-99-0181	20150414-99	2015/07/30	10:49:21	mammal	golden taikn	2	33.7053	107.632	2388	2015-04-14	2015-10-11
1049	CQ-20150414-99-0193	20150414-99	2015/08/27	22:44:58	mammal	golden taikn	1	33.7053	107.632	2388	2015-04-14	2015-10-11
1050	CQ-20150414-99-0197	20150414-99	2015/09/16	14:58:58	mammal	golden taikn	1	33.7053	107.632	2388	2015-04-14	2015-10-11
1051	CQ-20150414-99-0199	20150414-99	2015/09/20	07:19:26	mammal	golden taikn	1	33.7053	107.632	2388	2015-04-14	2015-10-11
1052	CQ-20150415-14-0283	20150415-14	2015/09/17	00:46:31	mammal	golden taikn	1	33.5331	107.704	1480	2015-04-15	2015-10-11
1053	CQ-20150415-14-0285	20150415-14	2015/09/19	18:27:05	mammal	golden taikn	2	33.5331	107.704	1480	2015-04-15	2015-10-11
1054	CQ-20150415-14-0289	20150415-14	2015/09/20	06:42:20	mammal	golden taikn	1	33.5331	107.704	1480	2015-04-15	2015-10-11
1055	CQ-20150415-14-0344	20150415-14	2015/9/30	4:16:18	mammal	golden taikn	1	33.5331	107.704	1480	2015-04-15	2015-10-11
1056	CQ-20150415-16-0189	20150415-16	2015/04/27	09:32:10	mammal	golden taikn	1	33.5537	107.644	1169	2015-04-15	2015-09-01
1057	CQ-20150415-17-0407	20150415-17	2015/08/05	14:53:41	mammal	golden taikn	1	33.5276	107.667	1312	2015-04-15	2015-10-12
1058	CQ-20150415-59-0344	20150415-59	2015/09/19	15:44:10	mammal	golden taikn	1	33.6339	107.452	1790	2015-04-15	2015-10-10
1059	CQ-20150416-36-0007	20150416-36	2015/04/18	18:14:44	mammal	golden taikn	1	33.5963	107.665	1709	2015-04-16	2015-10-11
1060	CQ-20150416-36-0083	20150416-36	2015/07/17	10:20:30	mammal	golden taikn	1	33.5963	107.665	1709	2015-04-16	2015-10-11
1061	CQ-20150416-36-0155	20150416-36	2015/09/14	07:08:25	mammal	golden taikn	1	33.5963	107.665	1709	2015-04-16	2015-10-11
1062	CQ-20150416-36-0157	20150416-36	2015/09/14	17:13:06	mammal	golden taikn	1	33.5963	107.665	1709	2015-04-16	2015-10-11
1063	CQ-20150416-66-0007	20150416-66	2015/04/17	01:23:20	mammal	golden taikn	1	33.624	107.592	1664	2015-04-16	2015-07-19
1064	CQ-20150416-66-0225	20150416-66	2015/04/28	21:53:34	mammal	golden taikn	1	33.624	107.592	1664	2015-04-16	2015-07-19
1065	CQ-20150416-71-0564	20150416-71	2015/10/07	18:06:10	mammal	golden taikn	1	33.6167	107.58	1532	2015-04-16	2015-10-17
1066	CQ-20150416-73-0145	20150416-73	2015/07/31	16:12:29	mammal	golden taikn	1	33.611	107.625	2407	2015-04-16	2015-10-17
1067	CQ-20150416-75-0197	20150416-75	2015/07/31	16:09:15	mammal	golden taikn	1	33.6245	107.605	1860	2015-04-16	2015-10-17
1068	CQ-20150416-75-0243	20150416-75	2015/10/08	15:15:19	mammal	golden taikn	1	33.6245	107.605	1860	2015-04-16	2015-10-17
1069	CQ-20150416-76-0029	20150416-76	2015/04/26	23:44:21	mammal	golden taikn	1	33.6131	107.602	2023	2015-04-16	2015-10-17
1070	CQ-20150416-98-0015	20150416-98	2015/04/24	19:18:43	mammal	golden taikn	1	33.621	107.616	2046	2015-04-16	2015-10-17
1071	CQ-20150416-98-0021	20150416-98	2015/04/24	23:47:37	mammal	golden taikn	1	33.621	107.616	2046	2015-04-16	2015-10-17
1072	CQ-20150420-104-0175	20150420-104	2015/10/03	10:01:47	mammal	golden taikn	1	33.6725	107.52	1497	2015-04-20	2015-10-09
1073	CQ-20150420-63-0005	20150420-63	2015/4/21	15:24:23	mammal	golden taikn	1	33.6804	107.519	1837	2015-04-20	2015-10-15
1074	CQ-20150420-63-0031	20150420-63	2015/4/26	16:24:42	mammal	golden taikn	1	33.6804	107.519	1837	2015-04-20	2015-10-15
1075	CQ-20150420-63-0303	20150420-63	2015/7/20	13:18:47	mammal	golden taikn	1	33.6804	107.519	1837	2015-04-20	2015-10-15
1076	CQ-20150420-63-0307	20150420-63	2015/7/21	14:39:49	mammal	golden taikn	1	33.6804	107.519	1837	2015-04-20	2015-10-15
1077	CQ-20150420-63-0497	20150420-63	2015/9/29	13:58:12	mammal	golden taikn	2	33.6804	107.519	1837	2015-04-20	2015-10-15
1078	CQ-20150421-06-0019	20150421-06	2015/05/12	23:41:06	mammal	golden taikn	1	33.4692	107.732	1296	2015-04-21	2015-10-15
1079	CQ-20150421-40-0153	20150421-40	2015/06/06	17:02:02	mammal	golden taikn	1	33.4989	107.695	1837	2015-04-21	2015-10-23
1080	CQ-20150421-40-0357	20150421-40	2015/07/09	16:54:26	mammal	golden taikn	1	33.4989	107.695	1837	2015-04-21	2015-10-23
1081	CQ-20150421-40-0457	20150421-40	2015/07/25	07:10:17	mammal	golden taikn	1	33.4989	107.695	1837	2015-04-21	2015-10-23
1082	CQ-20150421-40-1045	20150421-40	2015/10/16	13:35:03	mammal	golden taikn	1	33.4989	107.695	1837	2015-04-21	2015-10-23
1083	CQ-20150422-61-0091	20150422-61	2015/09/20	06:52:19	mammal	golden taikn	1	33.6851	107.495	1820	2015-04-22	2015-10-12
1084	CQ-20150423-100-0007	20150423-100	2015/04/24	18:21:14	mammal	golden taikn	1	33.6634	107.619	1863	2015-04-23	2015-06-11
1085	CQ-20150423-46-0039	20150423-46	2015/06/13	17:46:06	mammal	golden taikn	2	33.5893	107.708	1809	2015-04-23	2015-10-20
1086	CQ-20150423-46-0041	20150423-46	2015/06/15	08:10:55	mammal	golden taikn	2	33.5893	107.708	1809	2015-04-23	2015-10-20
1087	CQ-20150423-46-0049	20150423-46	2015/07/06	00:27:37	mammal	golden taikn	1	33.5893	107.708	1809	2015-04-23	2015-10-20
1088	CQ-20150423-46-0051	20150423-46	2015/07/07	01:59:16	mammal	golden taikn	1	33.5893	107.708	1809	2015-04-23	2015-10-20
1089	CQ-20150423-46-0059	20150423-46	2015/07/20	06:03:24	mammal	golden taikn	1	33.5893	107.708	1809	2015-04-23	2015-10-20
1090	CQ-20150423-46-0062	20150423-46	2015/7/22	20:11:58	mammal	golden taikn	1	33.5893	107.708	1809	2015-04-23	2015-10-20
1091	CQ-20150423-46-0063	20150423-46	2015/07/25	09:14:46	mammal	golden taikn	2	33.5893	107.708	1809	2015-04-23	2015-10-20
1092	CQ-20150423-46-0065	20150423-46	2015/07/25	20:08:29	mammal	golden taikn	1	33.5893	107.708	1809	2015-04-23	2015-10-20
1093	CQ-20150423-46-0071	20150423-46	2015/07/30	09:14:54	mammal	golden taikn	1	33.5893	107.708	1809	2015-04-23	2015-10-20
1094	CQ-20150423-46-0073	20150423-46	2015/07/30	14:10:05	mammal	golden taikn	2	33.5893	107.708	1809	2015-04-23	2015-10-20
1095	CQ-20150423-46-0077	20150423-46	2015/08/06	06:23:50	mammal	golden taikn	3	33.5893	107.708	1809	2015-04-23	2015-10-20
1096	CQ-20150423-46-0079	20150423-46	2015/08/06	14:07:08	mammal	golden taikn	5	33.5893	107.708	1809	2015-04-23	2015-10-20
1097	CQ-20150423-46-0093	20150423-46	2015/08/06	15:24:22	mammal	golden taikn	2	33.5893	107.708	1809	2015-04-23	2015-10-20
1098	CQ-20150423-46-0101	20150423-46	2015/08/09	11:57:45	mammal	golden taikn	1	33.5893	107.708	1809	2015-04-23	2015-10-20
1099	CQ-20150423-46-0107	20150423-46	2015/08/14	15:53:58	mammal	golden taikn	1	33.5893	107.708	1809	2015-04-23	2015-10-20
1100	CQ-20150423-46-0109	20150423-46	2015/08/29	15:36:20	mammal	golden taikn	2	33.5893	107.708	1809	2015-04-23	2015-10-20
1101	CQ-20150423-46-0121	20150423-46	2015/09/23	16:37:32	mammal	golden taikn	1	33.5893	107.708	1809	2015-04-23	2015-10-20
1102	CQ-20150423-46-0127	20150423-46	2015/10/03	07:33:10	mammal	golden taikn	1	33.5893	107.708	1809	2015-04-23	2015-10-20
1103	CQ-20150423-46-0129	20150423-46	2015/10/08	18:15:47	mammal	golden taikn	1	33.5893	107.708	1809	2015-04-23	2015-10-20
1104	CQ-20150423-46-0149	20150423-46	2015/10/13	02:32:07	mammal	golden taikn	1	33.5893	107.708	1809	2015-04-23	2015-10-20
1105	CQ-20150423-46-0152	20150423-46	2015/10/13	14:55:58	mammal	golden taikn	1	33.5893	107.708	1809	2015-04-23	2015-10-20
1106	CQ-20150423-46-0161	20150423-46	2015/10/13	17:20:35	mammal	golden taikn	1	33.5893	107.708	1809	2015-04-23	2015-10-20
1107	CQ-20150423-46-0163	20150423-46	2015/10/13	18:41:12	mammal	golden taikn	1	33.5893	107.708	1809	2015-04-23	2015-10-20
1108	CQ-20150423-46-0165	20150423-46	2015/10/14	14:17:56	mammal	golden taikn	1	33.5893	107.708	1809	2015-04-23	2015-10-20
1109	CQ-20150423-46-0175	20150423-46	2015/10/20	00:34:36	mammal	golden taikn	1	33.5893	107.708	1809	2015-04-23	2015-10-20
1110	CQ-20150423-97-0514	20150423-97	2015/09/27	18:11:28	mammal	golden taikn	1	33.6492	107.614	1676	2015-04-23	2015-10-21
1111	CQ-20150423-97-0524	20150423-97	2015/10/01	18:23:03	mammal	golden taikn	1	33.6492	107.614	1676	2015-04-23	2015-10-21
1112	CQ-20150424-21-0003	20150424-21	2015/04/28	11:46:02	mammal	golden taikn	1	33.5925	107.655	1903	2015-04-24	2015-10-20
1113	CQ-20150424-21-0012	20150424-21	2015/5/23	16:41:50	mammal	golden taikn	1	33.5925	107.655	1903	2015-04-24	2015-10-20
1114	CQ-20150424-21-0035	20150424-21	2015/08/15	02:16:56	mammal	golden taikn	1	33.5925	107.655	1903	2015-04-24	2015-10-20
1115	CQ-20150424-21-0041	20150424-21	2015/08/15	06:07:10	mammal	golden taikn	1	33.5925	107.655	1903	2015-04-24	2015-10-20
1116	CQ-20150424-21-0043	20150424-21	2015/08/17	07:47:32	mammal	golden taikn	1	33.5925	107.655	1903	2015-04-24	2015-10-20
1117	CQ-20150424-21-0045	20150424-21	2015/08/17	08:57:41	mammal	golden taikn	1	33.5925	107.655	1903	2015-04-24	2015-10-20
1118	CQ-20150424-21-0049	20150424-21	2015/09/12	05:27:37	mammal	golden taikn	1	33.5925	107.655	1903	2015-04-24	2015-10-20
1119	CQ-20150424-21-0053	20150424-21	2015/09/29	17:27:40	mammal	golden taikn	1	33.5925	107.655	1903	2015-04-24	2015-10-20
1120	CQ-20150424-21-0060	20150424-21	2015/9/30	8:09:36	mammal	golden taikn	1	33.5925	107.655	1903	2015-04-24	2015-10-20
1121	CQ-20150424-62-0078	20150424-62	2015/08/28	18:01:52	mammal	golden taikn	1	33.6535	107.639	1824	2015-04-24	2015-10-20
1122	CQ-20150424-62-0086	20150424-62	2015/08/30	17:17:11	mammal	golden taikn	1	33.6535	107.639	1824	2015-04-24	2015-10-20
1123	CQ-20150424-62-0088	20150424-62	2015/08/30	18:04:16	mammal	golden taikn	1	33.6535	107.639	1824	2015-04-24	2015-10-20
1124	CQ-20150424-62-0092	20150424-62	2015/08/31	06:43:33	mammal	golden taikn	1	33.6535	107.639	1824	2015-04-24	2015-10-20
1125	CQ-20150424-62-0095	20150424-62	2015/8/31	8:26:16	mammal	golden taikn	1	33.6535	107.639	1824	2015-04-24	2015-10-20
1126	CQ-20150424-62-0103	20150424-62	2015/9/4	7:29:20	mammal	golden taikn	1	33.6535	107.639	1824	2015-04-24	2015-10-20
1127	CQ-20150424-62-0110	20150424-62	2015/09/04	15:20:03	mammal	golden taikn	2	33.6535	107.639	1824	2015-04-24	2015-10-20
1128	CQ-20150424-62-0144	20150424-62	2015/10/18	12:19:16	mammal	golden taikn	1	33.6535	107.639	1824	2015-04-24	2015-10-20
1129	CQ-20150424-62-0148	20150424-62	2015/10/18	13:20:25	mammal	golden taikn	2	33.6535	107.639	1824	2015-04-24	2015-10-20
1130	CQ-20150424-62-0150	20150424-62	2015/10/18	15:34:38	mammal	golden taikn	1	33.6535	107.639	1824	2015-04-24	2015-10-20
1131	CQ-20150424-67-0029	20150424-67	2015/05/09	19:13:01	mammal	golden taikn	1	33.6442	107.623	1907	2015-04-24	2015-10-19
1132	CQ-20150424-67-0181	20150424-67	2015/08/31	12:38:36	mammal	golden taikn	1	33.6442	107.623	1907	2015-04-24	2015-10-19
1133	CQ-20150424-67-0185	20150424-67	2015/09/20	13:31:29	mammal	golden taikn	1	33.6442	107.623	1907	2015-04-24	2015-10-19
1134	CQ-20150424-67-0191	20150424-67	2015/09/25	10:06:56	mammal	golden taikn	1	33.6442	107.623	1907	2015-04-24	2015-10-19
1135	CQ-20150424-67-0193	20150424-67	2015/10/03	16:38:34	mammal	golden taikn	2	33.6442	107.623	1907	2015-04-24	2015-10-19
1136	CQ-20150424-67-0195	20150424-67	2015/10/06	14:20:40	mammal	golden taikn	1	33.6442	107.623	1907	2015-04-24	2015-10-19
1137	CQ-20150424-67-0199	20150424-67	2015/10/07	00:06:33	mammal	golden taikn	1	33.6442	107.623	1907	2015-04-24	2015-10-19
1138	CQ-20150424-67-0203	20150424-67	2015/10/07	07:18:29	mammal	golden taikn	1	33.6442	107.623	1907	2015-04-24	2015-10-19
1139	CQ-20150424-67-0209	20150424-67	2015/10/18	14:43:05	mammal	golden taikn	1	33.6442	107.623	1907	2015-04-24	2015-10-19
1140	CQ-20150424-69-0005	20150424-69	2015/04/29	02:39:36	mammal	golden taikn	1	33.6756	107.651	2080	2015-04-24	2015-10-20
1141	CQ-20150424-69-0007	20150424-69	2015/04/29	18:48:15	mammal	golden taikn	1	33.6756	107.651	2080	2015-04-24	2015-10-20
1142	CQ-20150424-69-0017	20150424-69	2015/04/29	20:56:58	mammal	golden taikn	1	33.6756	107.651	2080	2015-04-24	2015-10-20
1143	CQ-20150424-69-0019	20150424-69	2015/04/29	23:55:23	mammal	golden taikn	1	33.6756	107.651	2080	2015-04-24	2015-10-20
1144	CQ-20150424-69-0025	20150424-69	2015/05/01	06:41:52	mammal	golden taikn	1	33.6756	107.651	2080	2015-04-24	2015-10-20
1145	CQ-20150424-69-0027	20150424-69	2015/05/02	15:32:01	mammal	golden taikn	2	33.6756	107.651	2080	2015-04-24	2015-10-20
1146	CQ-20150424-69-0047	20150424-69	2015/05/03	10:25:25	mammal	golden taikn	2	33.6756	107.651	2080	2015-04-24	2015-10-20
1147	CQ-20150424-69-0051	20150424-69	2015/05/03	13:48:41	mammal	golden taikn	1	33.6756	107.651	2080	2015-04-24	2015-10-20
1148	CQ-20150424-69-0057	20150424-69	2015/05/03	14:23:37	mammal	golden taikn	1	33.6756	107.651	2080	2015-04-24	2015-10-20
1149	CQ-20150424-69-0068	20150424-69	2015/5/12	16:46:38	mammal	golden taikn	1	33.6756	107.651	2080	2015-04-24	2015-10-20
1150	CQ-20150424-69-0071	20150424-69	2015/05/13	10:53:40	mammal	golden taikn	1	33.6756	107.651	2080	2015-04-24	2015-10-20
1151	CQ-20150424-69-0079	20150424-69	2015/05/13	17:55:57	mammal	golden taikn	1	33.6756	107.651	2080	2015-04-24	2015-10-20
1152	CQ-20150424-69-0084	20150424-69	2015/5/13	19:32:34	mammal	golden taikn	1	33.6756	107.651	2080	2015-04-24	2015-10-20
1153	CQ-20150424-69-0085	20150424-69	2015/05/14	17:04:10	mammal	golden taikn	1	33.6756	107.651	2080	2015-04-24	2015-10-20
1154	CQ-20150424-69-0091	20150424-69	2015/05/19	14:35:07	mammal	golden taikn	1	33.6756	107.651	2080	2015-04-24	2015-10-20
1155	CQ-20150424-69-0097	20150424-69	2015/05/20	13:18:43	mammal	golden taikn	2	33.6756	107.651	2080	2015-04-24	2015-10-20
1156	CQ-20150424-69-0107	20150424-69	2015/05/20	15:39:22	mammal	golden taikn	1	33.6756	107.651	2080	2015-04-24	2015-10-20
1157	CQ-20150424-69-0109	20150424-69	2015/05/24	02:01:22	mammal	golden taikn	1	33.6756	107.651	2080	2015-04-24	2015-10-20
1158	CQ-20150424-69-0111	20150424-69	2015/05/24	05:16:05	mammal	golden taikn	1	33.6756	107.651	2080	2015-04-24	2015-10-20
1159	CQ-20150424-69-0117	20150424-69	2015/05/28	11:29:13	mammal	golden taikn	4	33.6756	107.651	2080	2015-04-24	2015-10-20
1160	CQ-20150424-69-0133	20150424-69	2015/05/30	23:28:58	mammal	golden taikn	1	33.6756	107.651	2080	2015-04-24	2015-10-20
1161	CQ-20150424-69-0729	20150424-69	2015/07/13	17:36:27	mammal	golden taikn	1	33.6756	107.651	2080	2015-04-24	2015-10-20
1162	CQ-20150424-69-0997	20150424-69	2015/08/06	15:21:04	mammal	golden taikn	1	33.6756	107.651	2080	2015-04-24	2015-10-20
1163	CQ-20150424-69-1001	20150424-69	2015/08/06	19:22:43	mammal	golden taikn	1	33.6756	107.651	2080	2015-04-24	2015-10-20
1164	CQ-20150424-69-1004	20150424-69	2015/8/7	1:24:50	mammal	golden taikn	1	33.6756	107.651	2080	2015-04-24	2015-10-20
1165	CQ-20150424-69-1008	20150424-69	2015/8/11	14:42:12	mammal	golden taikn	1	33.6756	107.651	2080	2015-04-24	2015-10-20
1166	CQ-20150424-69-1021	20150424-69	2015/08/16	14:56:28	mammal	golden taikn	1	33.6756	107.651	2080	2015-04-24	2015-10-20
1167	CQ-20150424-69-1023	20150424-69	2015/08/16	17:20:48	mammal	golden taikn	2	33.6756	107.651	2080	2015-04-24	2015-10-20
1168	CQ-20150424-69-1049	20150424-69	2015/08/17	06:10:36	mammal	golden taikn	1	33.6756	107.651	2080	2015-04-24	2015-10-20
1169	CQ-20150424-69-1053	20150424-69	2015/08/19	06:02:57	mammal	golden taikn	1	33.6756	107.651	2080	2015-04-24	2015-10-20
1170	CQ-20150424-69-1059	20150424-69	2015/08/19	08:31:57	mammal	golden taikn	1	33.6756	107.651	2080	2015-04-24	2015-10-20
1171	CQ-20150424-69-1061	20150424-69	2015/08/20	20:02:56	mammal	golden taikn	1	33.6756	107.651	2080	2015-04-24	2015-10-20
1172	CQ-20150424-69-1063	20150424-69	2015/08/20	22:20:30	mammal	golden taikn	1	33.6756	107.651	2080	2015-04-24	2015-10-20
1173	CQ-20150424-69-1065	20150424-69	2015/08/21	07:06:11	mammal	golden taikn	1	33.6756	107.651	2080	2015-04-24	2015-10-20
1174	CQ-20150424-69-1067	20150424-69	2015/08/21	13:25:15	mammal	golden taikn	1	33.6756	107.651	2080	2015-04-24	2015-10-20
1175	CQ-20150424-69-1069	20150424-69	2015/08/23	12:20:14	mammal	golden taikn	1	33.6756	107.651	2080	2015-04-24	2015-10-20
1176	CQ-20150424-69-1079	20150424-69	2015/08/24	16:00:45	mammal	golden taikn	2	33.6756	107.651	2080	2015-04-24	2015-10-20
1177	CQ-20150424-69-1085	20150424-69	2015/08/24	17:13:11	mammal	golden taikn	1	33.6756	107.651	2080	2015-04-24	2015-10-20
1178	CQ-20150424-69-1097	20150424-69	2015/08/25	12:58:51	mammal	golden taikn	2	33.6756	107.651	2080	2015-04-24	2015-10-20
1179	CQ-20150424-69-1106	20150424-69	2015/8/25	20:17:58	mammal	golden taikn	1	33.6756	107.651	2080	2015-04-24	2015-10-20
1180	CQ-20150424-69-1118	20150424-69	2015/8/25	23:59:38	mammal	golden taikn	1	33.6756	107.651	2080	2015-04-24	2015-10-20
1181	CQ-20150424-69-1131	20150424-69	2015/08/26	05:31:04	mammal	golden taikn	1	33.6756	107.651	2080	2015-04-24	2015-10-20
1182	CQ-20150424-69-1133	20150424-69	2015/09/01	15:17:58	mammal	golden taikn	1	33.6756	107.651	2080	2015-04-24	2015-10-20
1183	CQ-20150424-69-1137	20150424-69	2015/09/03	18:43:49	mammal	golden taikn	1	33.6756	107.651	2080	2015-04-24	2015-10-20
1184	CQ-20150424-69-1145	20150424-69	2015/09/07	18:25:17	mammal	golden taikn	2	33.6756	107.651	2080	2015-04-24	2015-10-20
1185	CQ-20150424-69-1151	20150424-69	2015/09/08	15:46:58	mammal	golden taikn	3	33.6756	107.651	2080	2015-04-24	2015-10-20
1186	CQ-20150424-69-1157	20150424-69	2015/09/09	08:04:56	mammal	golden taikn	1	33.6756	107.651	2080	2015-04-24	2015-10-20
1187	CQ-20150424-69-1167	20150424-69	2015/09/09	11:08:28	mammal	golden taikn	3	33.6756	107.651	2080	2015-04-24	2015-10-20
1188	CQ-20150424-69-1171	20150424-69	2015/09/10	06:33:32	mammal	golden taikn	1	33.6756	107.651	2080	2015-04-24	2015-10-20
1189	CQ-20150424-69-1177	20150424-69	2015/09/23	01:43:20	mammal	golden taikn	1	33.6756	107.651	2080	2015-04-24	2015-10-20
1190	CQ-20150424-69-1179	20150424-69	2015/09/25	18:24:23	mammal	golden taikn	1	33.6756	107.651	2080	2015-04-24	2015-10-20
1191	CQ-20150424-69-1187	20150424-69	2015/09/26	01:28:36	mammal	golden taikn	1	33.6756	107.651	2080	2015-04-24	2015-10-20
1192	CQ-20150424-69-1189	20150424-69	2015/09/26	07:36:47	mammal	golden taikn	1	33.6756	107.651	2080	2015-04-24	2015-10-20
1193	CQ-20150424-69-1191	20150424-69	2015/09/26	11:53:55	mammal	golden taikn	1	33.6756	107.651	2080	2015-04-24	2015-10-20
1194	CQ-20150424-69-1193	20150424-69	2015/09/27	09:11:01	mammal	golden taikn	1	33.6756	107.651	2080	2015-04-24	2015-10-20
1195	CQ-20150424-69-1195	20150424-69	2015/09/30	13:43:28	mammal	golden taikn	1	33.6756	107.651	2080	2015-04-24	2015-10-20
1196	CQ-20150424-69-1197	20150424-69	2015/10/01	22:29:57	mammal	golden taikn	1	33.6756	107.651	2080	2015-04-24	2015-10-20
1197	CQ-20150424-70-0016	20150424-70	2015/05/16	12:28:23	mammal	golden taikn	2	33.6914	107.665	2311	2015-04-24	2015-09-01
1198	CQ-20150424-70-0017	20150424-70	2015/05/16	19:46:42	mammal	golden taikn	1	33.6914	107.665	2311	2015-04-24	2015-09-01
1199	CQ-20150424-70-0019	20150424-70	2015/05/17	06:52:14	mammal	golden taikn	1	33.6914	107.665	2311	2015-04-24	2015-09-01
1200	CQ-20150424-70-0020	20150424-70	2015/05/17	22:38:22	mammal	golden taikn	1	33.6914	107.665	2311	2015-04-24	2015-09-01
1201	CQ-20150424-70-0024	20150424-70	2015/05/19	19:46:31	mammal	golden taikn	1	33.6914	107.665	2311	2015-04-24	2015-09-01
1202	CQ-20150424-70-0025	20150424-70	2015/05/20	09:02:58	mammal	golden taikn	1	33.6914	107.665	2311	2015-04-24	2015-09-01
1203	CQ-20150424-70-0026	20150424-70	2015/05/22	06:42:24	mammal	golden taikn	1	33.6914	107.665	2311	2015-04-24	2015-09-01
1204	CQ-20150424-70-0027	20150424-70	2015/05/22	07:52:37	mammal	golden taikn	1	33.6914	107.665	2311	2015-04-24	2015-09-01
1205	CQ-20150424-70-0034	20150424-70	2015/05/27	18:50:25	mammal	golden taikn	1	33.6914	107.665	2311	2015-04-24	2015-09-01
1206	CQ-20150424-70-0061	20150424-70	2015/06/03	18:57:27	mammal	golden taikn	1	33.6914	107.665	2311	2015-04-24	2015-09-01
1207	CQ-20150424-70-0062	20150424-70	2015/06/04	04:30:57	mammal	golden taikn	1	33.6914	107.665	2311	2015-04-24	2015-09-01
1208	CQ-20150424-70-0074	20150424-70	2015/06/05	13:58:00	mammal	golden taikn	1	33.6914	107.665	2311	2015-04-24	2015-09-01
1209	CQ-20150424-70-0076	20150424-70	2015/06/06	12:48:26	mammal	golden taikn	1	33.6914	107.665	2311	2015-04-24	2015-09-01
1210	CQ-20150424-70-0077	20150424-70	2015/06/06	17:46:47	mammal	golden taikn	1	33.6914	107.665	2311	2015-04-24	2015-09-01
1211	CQ-20150424-70-0078	20150424-70	2015/06/07	10:31:52	mammal	golden taikn	1	33.6914	107.665	2311	2015-04-24	2015-09-01
1212	CQ-20150424-70-0079	20150424-70	2015/06/07	12:11:51	mammal	golden taikn	1	33.6914	107.665	2311	2015-04-24	2015-09-01
1213	CQ-20150424-70-0134	20150424-70	2015/06/16	16:37:22	mammal	golden taikn	1	33.6914	107.665	2311	2015-04-24	2015-09-01
1214	CQ-20150424-70-0136	20150424-70	2015/06/17	09:44:34	mammal	golden taikn	1	33.6914	107.665	2311	2015-04-24	2015-09-01
1215	CQ-20150424-70-0352	20150424-70	2015/06/28	06:07:17	mammal	golden taikn	1	33.6914	107.665	2311	2015-04-24	2015-09-01
1216	CQ-20150424-70-0378	20150424-70	2015/06/29	17:06:35	mammal	golden taikn	1	33.6914	107.665	2311	2015-04-24	2015-09-01
1217	CQ-20150424-70-0514	20150424-70	2015/07/01	15:36:59	mammal	golden taikn	1	33.6914	107.665	2311	2015-04-24	2015-09-01
1218	CQ-20150424-70-0705	20150424-70	2015/07/02	19:47:16	mammal	golden taikn	1	33.6914	107.665	2311	2015-04-24	2015-09-01
1219	CQ-20150424-70-6936	20150424-70	2015/09/01	14:12:13	mammal	golden taikn	1	33.6914	107.665	2311	2015-04-24	2015-09-01
1220	CQ-20150424-77-0418	20150424-77	2015/10/13	3:04:04	mammal	golden taikn	1	33.6687	107.647	1956	2015-04-24	2015-10-16
1221	CQ-20150424-77-0419	20150424-77	2015/10/13	4:46:26	mammal	golden taikn	1	33.6687	107.647	1956	2015-04-24	2015-10-16
1222	CQ-20150424-78-0019	20150424-78	2015/05/04	18:17:15	mammal	golden taikn	1	33.6503	107.647	1967	2015-04-24	2015-10-20
1223	CQ-20150424-78-0064	20150424-78	2015/6/14	0:01:28	mammal	golden taikn	1	33.6503	107.647	1967	2015-04-24	2015-10-20
1224	CQ-20150424-78-0131	20150424-78	2015/08/25	18:15:53	mammal	golden taikn	1	33.6503	107.647	1967	2015-04-24	2015-10-20
1225	CQ-20150424-78-0137	20150424-78	2015/08/26	23:09:34	mammal	golden taikn	1	33.6503	107.647	1967	2015-04-24	2015-10-20
1226	CQ-20150424-78-0147	20150424-78	2015/08/30	22:46:35	mammal	golden taikn	1	33.6503	107.647	1967	2015-04-24	2015-10-20
1227	CQ-20150424-78-0155	20150424-78	2015/09/02	23:22:06	mammal	golden taikn	1	33.6503	107.647	1967	2015-04-24	2015-10-20
1228	CQ-20150424-78-0157	20150424-78	2015/09/03	18:23:54	mammal	golden taikn	1	33.6503	107.647	1967	2015-04-24	2015-10-20
1229	CQ-20150424-78-0213	20150424-78	2015/09/21	01:42:00	mammal	golden taikn	1	33.6503	107.647	1967	2015-04-24	2015-10-20
1230	CQ-20150424-78-0225	20150424-78	2015/09/24	08:41:06	mammal	golden taikn	1	33.6503	107.647	1967	2015-04-24	2015-10-20
1231	CQ-20150424-78-0237	20150424-78	2015/09/24	17:58:50	mammal	golden taikn	2	33.6503	107.647	1967	2015-04-24	2015-10-20
1232	CQ-20150424-78-0247	20150424-78	2015/09/28	08:03:14	mammal	golden taikn	2	33.6503	107.647	1967	2015-04-24	2015-10-20
1233	CQ-20150424-78-0249	20150424-78	2015/09/29	09:54:06	mammal	golden taikn	3	33.6503	107.647	1967	2015-04-24	2015-10-20
1234	CQ-20150424-78-0251	20150424-78	2015/09/29	18:31:34	mammal	golden taikn	1	33.6503	107.647	1967	2015-04-24	2015-10-20
1235	CQ-20150424-78-0253	20150424-78	2015/09/30	08:00:14	mammal	golden taikn	2	33.6503	107.647	1967	2015-04-24	2015-10-20
1236	CQ-20150424-78-0255	20150424-78	2015/09/30	08:52:35	mammal	golden taikn	2	33.6503	107.647	1967	2015-04-24	2015-10-20
1237	CQ-20150424-78-0257	20150424-78	2015/09/30	14:02:23	mammal	golden taikn	1	33.6503	107.647	1967	2015-04-24	2015-10-20
1238	CQ-20150424-78-0263	20150424-78	2015/10/07	08:41:31	mammal	golden taikn	2	33.6503	107.647	1967	2015-04-24	2015-10-20
1239	CQ-20150424-78-0269	20150424-78	2015/10/07	18:35:18	mammal	golden taikn	1	33.6503	107.647	1967	2015-04-24	2015-10-20
1240	CQ-20150424-78-0283	20150424-78	2015/10/14	16:18:26	mammal	golden taikn	1	33.6503	107.647	1967	2015-04-24	2015-10-20
1241	CQ-20150424-78-0313	20150424-78	2015/10/20	05:58:41	mammal	golden taikn	1	33.6503	107.647	1967	2015-04-24	2015-10-20
1242	CQ-20150424-93-0003	20150424-93	2015/04/30	16:47:47	mammal	golden taikn	1	33.6582	107.666	2231	2015-04-24	2015-10-20
1243	CQ-20150424-93-0009	20150424-93	2015/05/20	07:20:06	mammal	golden taikn	1	33.6582	107.666	2231	2015-04-24	2015-10-20
1244	CQ-20150424-93-0017	20150424-93	2015/05/24	16:47:49	mammal	golden taikn	1	33.6582	107.666	2231	2015-04-24	2015-10-20
1245	CQ-20150424-93-0021	20150424-93	2015/05/26	07:45:20	mammal	golden taikn	1	33.6582	107.666	2231	2015-04-24	2015-10-20
1246	CQ-20150424-93-0023	20150424-93	2015/05/26	18:31:02	mammal	golden taikn	1	33.6582	107.666	2231	2015-04-24	2015-10-20
1247	CQ-20150424-93-0037	20150424-93	2015/06/06	08:40:59	mammal	golden taikn	2	33.6582	107.666	2231	2015-04-24	2015-10-20
1248	CQ-20150424-93-0043	20150424-93	2015/06/16	06:12:52	mammal	golden taikn	1	33.6582	107.666	2231	2015-04-24	2015-10-20
1249	CQ-20150424-93-0049	20150424-93	2015/07/04	23:25:51	mammal	golden taikn	1	33.6582	107.666	2231	2015-04-24	2015-10-20
1250	CQ-20150424-93-0059	20150424-93	2015/08/14	07:04:05	mammal	golden taikn	1	33.6582	107.666	2231	2015-04-24	2015-10-20
1251	CQ-20150424-93-0061	20150424-93	2015/08/14	08:22:18	mammal	golden taikn	1	33.6582	107.666	2231	2015-04-24	2015-10-20
1252	CQ-20150424-93-0063	20150424-93	2015/08/14	13:24:51	mammal	golden taikn	1	33.6582	107.666	2231	2015-04-24	2015-10-20
1253	CQ-20150424-93-0073	20150424-93	2015/09/11	12:29:16	mammal	golden taikn	1	33.6582	107.666	2231	2015-04-24	2015-10-20
1254	CQ-20150424-93-0083	20150424-93	2015/10/01	07:23:23	mammal	golden taikn	1	33.6582	107.666	2231	2015-04-24	2015-10-20
1255	CQ-20150427-31-0031	20150427-31	2015/5/30	10:33:58	mammal	golden taikn	1	33.6105	107.665	1705	2015-04-27	2015-10-18
1256	CQ-20150427-31-0182	20150427-31	2015/09/03	10:24:13	mammal	golden taikn	1	33.6105	107.665	1705	2015-04-27	2015-10-18
1257	CQ-20150427-31-0211	20150427-31	2015/10/8	17:33:32	mammal	golden taikn	1	33.6105	107.665	1705	2015-04-27	2015-10-18
1258	CQ-20150427-31-0212	20150427-31	2015/10/08	18:08:32	mammal	golden taikn	1	33.6105	107.665	1705	2015-04-27	2015-10-18
1259	CQ-20150427-34-0009	20150427-34	2015/05/14	13:15:42	mammal	golden taikn	1	33.5955	107.697	2013	2015-04-27	2015-10-19
1260	CQ-20150427-34-0011	20150427-34	2015/05/14	18:52:18	mammal	golden taikn	1	33.5955	107.697	2013	2015-04-27	2015-10-19
1261	CQ-20150427-34-0016	20150427-34	2015/5/19	6:54:02	mammal	golden taikn	1	33.5955	107.697	2013	2015-04-27	2015-10-19
1262	CQ-20150427-34-0019	20150427-34	2015/05/19	08:17:40	mammal	golden taikn	1	33.5955	107.697	2013	2015-04-27	2015-10-19
1263	CQ-20150427-34-0033	20150427-34	2015/05/19	10:12:33	mammal	golden taikn	1	33.5955	107.697	2013	2015-04-27	2015-10-19
1264	CQ-20150427-34-0037	20150427-34	2015/05/20	10:02:28	mammal	golden taikn	1	33.5955	107.697	2013	2015-04-27	2015-10-19
1265	CQ-20150427-34-0039	20150427-34	2015/05/21	19:20:46	mammal	golden taikn	1	33.5955	107.697	2013	2015-04-27	2015-10-19
1266	CQ-20150427-34-0043	20150427-34	2015/05/24	13:18:08	mammal	golden taikn	1	33.5955	107.697	2013	2015-04-27	2015-10-19
1267	CQ-20150427-34-0084	20150427-34	2015/7/27	23:47:28	mammal	golden taikn	1	33.5955	107.697	2013	2015-04-27	2015-10-19
1268	CQ-20150427-34-0085	20150427-34	2015/07/28	00:19:03	mammal	golden taikn	1	33.5955	107.697	2013	2015-04-27	2015-10-19
1269	CQ-20150427-34-0087	20150427-34	2015/07/28	12:37:53	mammal	golden taikn	1	33.5955	107.697	2013	2015-04-27	2015-10-19
1270	CQ-20150427-34-0089	20150427-34	2015/07/28	13:10:01	mammal	golden taikn	1	33.5955	107.697	2013	2015-04-27	2015-10-19
1271	CQ-20150427-34-0107	20150427-34	2015/09/09	18:42:18	mammal	golden taikn	1	33.5955	107.697	2013	2015-04-27	2015-10-19
1272	CQ-20150427-34-0115	20150427-34	2015/10/04	07:05:30	mammal	golden taikn	1	33.5955	107.697	2013	2015-04-27	2015-10-19
1273	CQ-20150427-34-0117	20150427-34	2015/10/04	14:56:46	mammal	golden taikn	1	33.5955	107.697	2013	2015-04-27	2015-10-19
1274	CQ-20150427-34-0119	20150427-34	2015/10/05	00:45:11	mammal	golden taikn	1	33.5955	107.697	2013	2015-04-27	2015-10-19
1275	CQ-20150427-34-0124	20150427-34	2015/10/15	10:14:26	mammal	golden taikn	1	33.5955	107.697	2013	2015-04-27	2015-10-19
1276	CQ-20150427-34-0136	20150427-34	2015/10/19	07:00:05	mammal	golden taikn	1	33.5955	107.697	2013	2015-04-27	2015-10-19
1277	CQ-20150427-86-0080	20150427-86	2015/07/16	14:21:00	mammal	golden taikn	1	33.6796	107.604	1841	2015-04-27	2015-10-10
1278	CQ-20150427-86-0098	20150427-86	2015/07/30	10:39:19	mammal	golden taikn	1	33.6796	107.604	1841	2015-04-27	2015-10-10
1279	CQ-20150427-86-0100	20150427-86	2015/08/01	21:57:37	mammal	golden taikn	1	33.6796	107.604	1841	2015-04-27	2015-10-10
1280	CQ-20150427-86-0102	20150427-86	2015/08/02	00:49:49	mammal	golden taikn	1	33.6796	107.604	1841	2015-04-27	2015-10-10
1281	CQ-20150427-86-0140	20150427-86	2015/08/28	15:04:15	mammal	golden taikn	1	33.6796	107.604	1841	2015-04-27	2015-10-10
1282	CQ-20150427-86-0150	20150427-86	2015/09/03	06:05:38	mammal	golden taikn	1	33.6796	107.604	1841	2015-04-27	2015-10-10
1283	CQ-20150427-86-0166	20150427-86	2015/09/08	04:54:05	mammal	golden taikn	1	33.6796	107.604	1841	2015-04-27	2015-10-10
1284	CQ-20150427-86-0186	20150427-86	2015/09/17	05:50:35	mammal	golden taikn	1	33.6796	107.604	1841	2015-04-27	2015-10-10
1285	CQ-20150427-86-0188	20150427-86	2015/09/17	06:47:51	mammal	golden taikn	1	33.6796	107.604	1841	2015-04-27	2015-10-10
1286	CQ-20150427-86-0222	20150427-86	2015/10/01	02:35:54	mammal	golden taikn	1	33.6796	107.604	1841	2015-04-27	2015-10-10
1287	CQ-20150427-86-0228	20150427-86	2015/10/04	07:07:23	mammal	golden taikn	1	33.6796	107.604	1841	2015-04-27	2015-10-10
1288	CQ-20150427-86-0244	20150427-86	2015/10/04	12:40:47	mammal	golden taikn	1	33.6796	107.604	1841	2015-04-27	2015-10-10
1289	CQ-20150427-86-0248	20150427-86	2015/10/04	17:36:03	mammal	golden taikn	1	33.6796	107.604	1841	2015-04-27	2015-10-10
1290	CQ-20150427-86-0250	20150427-86	2015/10/05	00:45:17	mammal	golden taikn	1	33.6796	107.604	1841	2015-04-27	2015-10-10
1291	CQ-20150427-86-0252	20150427-86	2015/10/05	06:21:21	mammal	golden taikn	1	33.6796	107.604	1841	2015-04-27	2015-10-10
1292	CQ-20150428-19-0159	20150428-19	2015/10/8	17:51:02	mammal	golden taikn	1	33.5354	107.646	1579	2015-04-28	2015-10-13
1293	CQ-20150428-26-0024	20150428-26	2015/5/6	18:04:52	mammal	golden taikn	1	33.6294	107.713	1845	2015-04-28	2015-10-18
1294	CQ-20150428-26-0045	20150428-26	2015/08/14	07:11:13	mammal	golden taikn	1	33.6294	107.713	1845	2015-04-28	2015-10-18
1295	CQ-20150428-26-0047	20150428-26	2015/08/14	13:14:52	mammal	golden taikn	1	33.6294	107.713	1845	2015-04-28	2015-10-18
1296	CQ-20150428-26-0052	20150428-26	2015/8/14	19:02:08	mammal	golden taikn	1	33.6294	107.713	1845	2015-04-28	2015-10-18
1297	CQ-20150428-26-0057	20150428-26	2015/08/22	13:49:29	mammal	golden taikn	2	33.6294	107.713	1845	2015-04-28	2015-10-18
1298	CQ-20150428-26-0065	20150428-26	2015/08/28	09:07:42	mammal	golden taikn	1	33.6294	107.713	1845	2015-04-28	2015-10-18
1299	CQ-20150428-26-0069	20150428-26	2015/09/03	12:30:56	mammal	golden taikn	1	33.6294	107.713	1845	2015-04-28	2015-10-18
1300	CQ-20150428-26-0076	20150428-26	2015/9/4	10:41:26	mammal	golden taikn	1	33.6294	107.713	1845	2015-04-28	2015-10-18
1301	CQ-20150428-26-0079	20150428-26	2015/09/06	15:41:48	mammal	golden taikn	1	33.6294	107.713	1845	2015-04-28	2015-10-18
1302	CQ-20150428-26-0093	20150428-26	2015/10/11	15:03:06	mammal	golden taikn	1	33.6294	107.713	1845	2015-04-28	2015-10-18
1303	CQ-20150428-27-0012	20150428-27	2015/05/06	21:15:40	mammal	golden taikn	1	33.6318	107.665	1549	2015-04-28	2015-10-19
1304	CQ-20150428-27-0122	20150428-27	2015/09/18	17:24:17	mammal	golden taikn	1	33.6318	107.665	1549	2015-04-28	2015-10-19
1305	CQ-20150428-27-0126	20150428-27	2015/09/21	15:06:16	mammal	golden taikn	1	33.6318	107.665	1549	2015-04-28	2015-10-19
1306	CQ-20150428-27-0128	20150428-27	2015/09/21	18:01:21	mammal	golden taikn	1	33.6318	107.665	1549	2015-04-28	2015-10-19
1307	CQ-20150428-27-0130	20150428-27	2015/09/22	13:04:56	mammal	golden taikn	1	33.6318	107.665	1549	2015-04-28	2015-10-19
1308	CQ-20150428-27-0132	20150428-27	2015/09/30	06:29:31	mammal	golden taikn	1	33.6318	107.665	1549	2015-04-28	2015-10-19
1309	CQ-20150428-27-0134	20150428-27	2015/09/30	12:03:04	mammal	golden taikn	1	33.6318	107.665	1549	2015-04-28	2015-10-19
1310	CQ-20150428-27-0140	20150428-27	2015/10/12	09:03:21	mammal	golden taikn	1	33.6318	107.665	1549	2015-04-28	2015-10-19
1311	CQ-20150428-58-0004	20150428-58	2015/04/29	01:41:41	mammal	golden taikn	1	33.668	107.483	2021	2015-04-28	2015-09-26
1312	CQ-20150428-96-0218	20150428-96	2015/05/23	17:42:51	mammal	golden taikn	2	33.7002	107.604	2414	2015-04-28	2015-10-12
1313	CQ-20150428-96-0236	20150428-96	2015/05/28	11:27:17	mammal	golden taikn	1	33.7002	107.604	2414	2015-04-28	2015-10-12
1314	CQ-20150428-96-0242	20150428-96	2015/05/29	01:12:36	mammal	golden taikn	2	33.7002	107.604	2414	2015-04-28	2015-10-12
1315	CQ-20150428-96-0246	20150428-96	2015/05/30	01:53:19	mammal	golden taikn	1	33.7002	107.604	2414	2015-04-28	2015-10-12
1316	CQ-20150428-96-0250	20150428-96	2015/05/31	13:56:17	mammal	golden taikn	1	33.7002	107.604	2414	2015-04-28	2015-10-12
1317	CQ-20150428-96-0288	20150428-96	2015/06/01	11:20:40	mammal	golden taikn	1	33.7002	107.604	2414	2015-04-28	2015-10-12
1318	CQ-20150428-96-0302	20150428-96	2015/06/01	12:56:51	mammal	golden taikn	1	33.7002	107.604	2414	2015-04-28	2015-10-12
1319	CQ-20150428-96-0304	20150428-96	2015/06/04	08:18:07	mammal	golden taikn	1	33.7002	107.604	2414	2015-04-28	2015-10-12
1320	CQ-20150428-96-0318	20150428-96	2015/06/04	09:04:10	mammal	golden taikn	1	33.7002	107.604	2414	2015-04-28	2015-10-12
1321	CQ-20150428-96-0359	20150428-96	2015/6/7	14:05:54	mammal	golden taikn	1	33.7002	107.604	2414	2015-04-28	2015-10-12
1322	CQ-20150428-96-0384	20150428-96	2015/06/19	08:07:34	mammal	golden taikn	1	33.7002	107.604	2414	2015-04-28	2015-10-12
1323	CQ-20150428-96-0386	20150428-96	2015/06/19	19:06:06	mammal	golden taikn	1	33.7002	107.604	2414	2015-04-28	2015-10-12
1324	CQ-20150428-96-0394	20150428-96	2015/06/21	16:26:30	mammal	golden taikn	2	33.7002	107.604	2414	2015-04-28	2015-10-12
1325	CQ-20150428-96-0412	20150428-96	2015/06/21	17:51:19	mammal	golden taikn	1	33.7002	107.604	2414	2015-04-28	2015-10-12
1326	CQ-20150428-96-0414	20150428-96	2015/06/22	06:56:46	mammal	golden taikn	1	33.7002	107.604	2414	2015-04-28	2015-10-12
1327	CQ-20150428-96-0420	20150428-96	2015/06/23	17:06:00	mammal	golden taikn	1	33.7002	107.604	2414	2015-04-28	2015-10-12
1328	CQ-20150428-96-0424	20150428-96	2015/06/29	05:15:00	mammal	golden taikn	1	33.7002	107.604	2414	2015-04-28	2015-10-12
1329	CQ-20150428-96-0426	20150428-96	2015/06/29	09:16:40	mammal	golden taikn	1	33.7002	107.604	2414	2015-04-28	2015-10-12
1330	CQ-20150428-96-0428	20150428-96	2015/06/29	09:50:47	mammal	golden taikn	1	33.7002	107.604	2414	2015-04-28	2015-10-12
1331	CQ-20150428-96-0430	20150428-96	2015/06/29	19:20:13	mammal	golden taikn	1	33.7002	107.604	2414	2015-04-28	2015-10-12
1332	CQ-20150428-96-0432	20150428-96	2015/06/30	08:53:02	mammal	golden taikn	1	33.7002	107.604	2414	2015-04-28	2015-10-12
1333	CQ-20150428-96-0438	20150428-96	2015/06/30	14:50:00	mammal	golden taikn	1	33.7002	107.604	2414	2015-04-28	2015-10-12
1334	CQ-20150428-96-0442	20150428-96	2015/07/01	12:55:03	mammal	golden taikn	1	33.7002	107.604	2414	2015-04-28	2015-10-12
1335	CQ-20150428-96-0447	20150428-96	2015/7/4	13:29:38	mammal	golden taikn	1	33.7002	107.604	2414	2015-04-28	2015-10-12
1336	CQ-20150428-96-0448	20150428-96	2015/07/04	16:28:24	mammal	golden taikn	1	33.7002	107.604	2414	2015-04-28	2015-10-12
1337	CQ-20150428-96-0452	20150428-96	2015/07/05	18:40:16	mammal	golden taikn	1	33.7002	107.604	2414	2015-04-28	2015-10-12
1338	CQ-20150428-96-0474	20150428-96	2015/07/11	07:48:28	mammal	golden taikn	1	33.7002	107.604	2414	2015-04-28	2015-10-12
1339	CQ-20150428-96-0486	20150428-96	2015/07/15	15:01:12	mammal	golden taikn	2	33.7002	107.604	2414	2015-04-28	2015-10-12
1340	CQ-20150428-96-0496	20150428-96	2015/07/23	08:50:01	mammal	golden taikn	1	33.7002	107.604	2414	2015-04-28	2015-10-12
1341	CQ-20150428-96-0498	20150428-96	2015/07/23	17:24:44	mammal	golden taikn	1	33.7002	107.604	2414	2015-04-28	2015-10-12
1342	CQ-20150428-96-0512	20150428-96	2015/07/31	08:38:26	mammal	golden taikn	1	33.7002	107.604	2414	2015-04-28	2015-10-12
1343	CQ-20150428-96-0519	20150428-96	2015/8/1	19:51:30	mammal	golden taikn	1	33.7002	107.604	2414	2015-04-28	2015-10-12
1344	CQ-20150428-96-0524	20150428-96	2015/08/05	15:02:12	mammal	golden taikn	1	33.7002	107.604	2414	2015-04-28	2015-10-12
1345	CQ-20150428-96-0526	20150428-96	2015/08/05	16:25:49	mammal	golden taikn	2	33.7002	107.604	2414	2015-04-28	2015-10-12
1346	CQ-20150428-96-0530	20150428-96	2015/08/05	17:45:35	mammal	golden taikn	2	33.7002	107.604	2414	2015-04-28	2015-10-12
1347	CQ-20150428-96-0534	20150428-96	2015/08/05	21:21:50	mammal	golden taikn	1	33.7002	107.604	2414	2015-04-28	2015-10-12
1348	CQ-20150428-96-0536	20150428-96	2015/08/06	01:00:48	mammal	golden taikn	1	33.7002	107.604	2414	2015-04-28	2015-10-12
1349	CQ-20150428-96-0538	20150428-96	2015/08/06	18:57:30	mammal	golden taikn	1	33.7002	107.604	2414	2015-04-28	2015-10-12
1350	CQ-20150428-96-0542	20150428-96	2015/08/08	18:54:32	mammal	golden taikn	1	33.7002	107.604	2414	2015-04-28	2015-10-12
1351	CQ-20150428-96-0547	20150428-96	2015/8/9	7:21:44	mammal	golden taikn	1	33.7002	107.604	2414	2015-04-28	2015-10-12
1352	CQ-20150428-96-0582	20150428-96	2015/08/24	11:40:29	mammal	golden taikn	1	33.7002	107.604	2414	2015-04-28	2015-10-12
1353	CQ-20150428-96-0594	20150428-96	2015/08/30	16:35:02	mammal	golden taikn	2	33.7002	107.604	2414	2015-04-28	2015-10-12
1354	CQ-20150428-96-0598	20150428-96	2015/08/30	17:17:14	mammal	golden taikn	1	33.7002	107.604	2414	2015-04-28	2015-10-12
1355	CQ-20150428-96-0608	20150428-96	2015/09/23	05:57:07	mammal	golden taikn	1	33.7002	107.604	2414	2015-04-28	2015-10-12
1356	CQ-20150428-96-0614	20150428-96	2015/09/25	18:33:37	mammal	golden taikn	1	33.7002	107.604	2414	2015-04-28	2015-10-12
1357	CQ-20150428-96-0640	20150428-96	2015/09/25	20:38:47	mammal	golden taikn	1	33.7002	107.604	2414	2015-04-28	2015-10-12
1358	CQ-20150428-96-0655	20150428-96	2015/9/25	21:59:14	mammal	golden taikn	1	33.7002	107.604	2414	2015-04-28	2015-10-12
1359	CQ-20150428-96-0666	20150428-96	2015/10/05	15:07:59	mammal	golden taikn	1	33.7002	107.604	2414	2015-04-28	2015-10-12
1360	CQ-20150926-58-0007	20150926-58	2015/10/02	09:08:01	mammal	golden taikn	1	33.6584	107.481	1526	2015-09-26	2016-03-27
1361	CQ-20150926-58-0119	20150926-58	2015/12/16	06:31:24	mammal	golden taikn	1	33.6584	107.481	1526	2015-09-26	2016-03-27
1362	CQ-20151005-55-0044	20151005-55	2015/11/07	17:11:33	mammal	golden taikn	1	33.6361	107.489	1436	2015-10-05	2016-03-28
1363	CQ-20151010-44-0065	20151010-44	2016/02/09	08:12:06	mammal	golden taikn	2	33.5344	107.65	1035	2015-10-10	2016-04-07
1364	CQ-20151010-56-0004	20151010-56	2015/10/12	09:44:03	mammal	golden taikn	1	33.6856	107.591	2054	2015-10-10	2016-04-02
1365	CQ-20151010-56-0008	20151010-56	2015/10/13	17:23:45	mammal	golden taikn	1	33.6856	107.591	2054	2015-10-10	2016-04-02
1366	CQ-20151010-56-0016	20151010-56	2015/11/19	09:47:26	mammal	golden taikn	1	33.6856	107.591	2054	2015-10-10	2016-04-02
1367	CQ-20151010-56-0026	20151010-56	2015/12/23	15:04:30	mammal	golden taikn	2	33.6856	107.591	2054	2015-10-10	2016-04-02
1368	CQ-20151010-56-0173	20151010-56	2016/02/14	12:01:00	mammal	golden taikn	1	33.6856	107.591	2054	2015-10-10	2016-04-02
1369	CQ-20151010-56-0186	20151010-56	2016/03/27	18:58:41	mammal	golden taikn	1	33.6856	107.591	2054	2015-10-10	2016-04-02
1370	CQ-20151010-56-0187	20151010-56	2016/03/28	13:04:17	mammal	golden taikn	1	33.6856	107.591	2054	2015-10-10	2016-04-02
1371	CQ-20151010-56-0189	20151010-56	2016/03/29	18:55:12	mammal	golden taikn	1	33.6856	107.591	2054	2015-10-10	2016-04-02
1372	CQ-20151010-56-0191	20151010-56	2016/03/30	06:43:48	mammal	golden taikn	1	33.6856	107.591	2054	2015-10-10	2016-04-02
1373	CQ-20151010-56-0195	20151010-56	2016/03/30	17:01:55	mammal	golden taikn	1	33.6856	107.591	2054	2015-10-10	2016-04-02
1374	CQ-20151010-56-0209	20151010-56	2016/03/31	07:53:47	mammal	golden taikn	1	33.6856	107.591	2054	2015-10-10	2016-04-02
1375	CQ-20151010-56-0211	20151010-56	2016/03/31	09:22:43	mammal	golden taikn	1	33.6856	107.591	2054	2015-10-10	2016-04-02
1376	CQ-20151010-56-0217	20151010-56	2016/04/01	11:06:06	mammal	golden taikn	2	33.6856	107.591	2054	2015-10-10	2016-04-02
1377	CQ-20151010-56-0219	20151010-56	2016/04/01	16:01:22	mammal	golden taikn	2	33.6856	107.591	2054	2015-10-10	2016-04-02
1378	CQ-20151010-56-0296	20151010-56	2016/04/02	10:34:29	mammal	golden taikn	2	33.6856	107.591	2054	2015-10-10	2016-04-02
1379	CQ-20151010-56-0387	20151010-56	2016/04/02	14:04:36	mammal	golden taikn	3	33.6856	107.591	2054	2015-10-10	2016-04-02
1380	CQ-20151010-68-0071	20151010-68	2015/11/12	15:18:10	mammal	golden taikn	1	33.689	107.537	2487	2015-10-10	2016-04-12
1381	CQ-20151010-68-0078	20151010-68	2015/11/13	11:19:56	mammal	golden taikn	1	33.689	107.537	2487	2015-10-10	2016-04-12
1382	CQ-20151010-68-0080	20151010-68	2015/11/14	12:49:22	mammal	golden taikn	1	33.689	107.537	2487	2015-10-10	2016-04-12
1383	CQ-20151010-68-0086	20151010-68	2015/11/24	07:50:55	mammal	golden taikn	1	33.689	107.537	2487	2015-10-10	2016-04-12
1384	CQ-20151010-68-0088	20151010-68	2015/11/26	17:11:56	mammal	golden taikn	1	33.689	107.537	2487	2015-10-10	2016-04-12
1385	CQ-20151010-68-0099	20151010-68	2015/12/08	07:37:29	mammal	golden taikn	1	33.689	107.537	2487	2015-10-10	2016-04-12
1386	CQ-20151010-68-0103	20151010-68	2015/12/26	14:30:40	mammal	golden taikn	2	33.689	107.537	2487	2015-10-10	2016-04-12
1387	CQ-20151010-68-0107	20151010-68	2016/01/01	12:43:29	mammal	golden taikn	1	33.689	107.537	2487	2015-10-10	2016-04-12
1388	CQ-20151010-68-0115	20151010-68	2016/02/01	17:47:10	mammal	golden taikn	1	33.689	107.537	2487	2015-10-10	2016-04-12
1389	CQ-20151010-68-0126	20151010-68	2016/03/02	08:34:21	mammal	golden taikn	1	33.689	107.537	2487	2015-10-10	2016-04-12
1390	CQ-20151010-68-0131	20151010-68	2016/03/12	14:43:08	mammal	golden taikn	1	33.689	107.537	2487	2015-10-10	2016-04-12
1391	CQ-20151010-68-0132	20151010-68	2016/03/12	16:51:39	mammal	golden taikn	1	33.689	107.537	2487	2015-10-10	2016-04-12
1392	CQ-20151010-68-0143	20151010-68	2016/03/21	17:33:49	mammal	golden taikn	1	33.689	107.537	2487	2015-10-10	2016-04-12
1393	CQ-20151010-68-0145	20151010-68	2016/03/28	07:51:09	mammal	golden taikn	1	33.689	107.537	2487	2015-10-10	2016-04-12
1394	CQ-20151010-68-0151	20151010-68	2016/04/03	19:42:25	mammal	golden taikn	1	33.689	107.537	2487	2015-10-10	2016-04-12
1395	CQ-20151010-68-0154	20151010-68	2016/04/04	14:00:57	mammal	golden taikn	1	33.689	107.537	2487	2015-10-10	2016-04-12
1396	CQ-20151010-68-0156	20151010-68	2016/04/07	18:43:39	mammal	golden taikn	1	33.689	107.537	2487	2015-10-10	2016-04-12
1397	CQ-20151010-68-0163	20151010-68	2016/04/09	17:00:27	mammal	golden taikn	1	33.689	107.537	2487	2015-10-10	2016-04-12
1398	CQ-20151010-83-0086	20151010-83	2015/10/23	07:58:27	mammal	golden taikn	1	33.6643	107.543	1655	2015-10-10	2016-04-12
1399	CQ-20151010-83-0121	20151010-83	2015/11/12	15:41:28	mammal	golden taikn	1	33.6643	107.543	1655	2015-10-10	2016-04-12
1400	CQ-20151010-83-0126	20151010-83	2015/11/12	23:12:51	mammal	golden taikn	1	33.6643	107.543	1655	2015-10-10	2016-04-12
1401	CQ-20151010-83-0128	20151010-83	2015/11/12	23:52:17	mammal	golden taikn	1	33.6643	107.543	1655	2015-10-10	2016-04-12
1402	CQ-20151010-83-0130	20151010-83	2015/11/13	08:39:13	mammal	golden taikn	1	33.6643	107.543	1655	2015-10-10	2016-04-12
1403	CQ-20151010-83-0134	20151010-83	2015/11/13	15:56:14	mammal	golden taikn	1	33.6643	107.543	1655	2015-10-10	2016-04-12
1404	CQ-20151010-83-0138	20151010-83	2015/11/14	14:11:06	mammal	golden taikn	1	33.6643	107.543	1655	2015-10-10	2016-04-12
1405	CQ-20151010-83-0156	20151010-83	2015/11/20	23:15:14	mammal	golden taikn	1	33.6643	107.543	1655	2015-10-10	2016-04-12
1406	CQ-20151010-83-0174	20151010-83	2015/12/01	17:33:52	mammal	golden taikn	1	33.6643	107.543	1655	2015-10-10	2016-04-12
1407	CQ-20151010-83-0214	20151010-83	2016/01/07	13:40:13	mammal	golden taikn	1	33.6643	107.543	1655	2015-10-10	2016-04-12
1408	CQ-20151010-83-0232	20151010-83	2016/01/21	11:43:30	mammal	golden taikn	1	33.6643	107.543	1655	2015-10-10	2016-04-12
1409	CQ-20151010-83-0234	20151010-83	2016/01/22	16:04:20	mammal	golden taikn	1	33.6643	107.543	1655	2015-10-10	2016-04-12
1410	CQ-20151010-83-0284	20151010-83	2016/03/02	16:50:31	mammal	golden taikn	1	33.6643	107.543	1655	2015-10-10	2016-04-12
1411	CQ-20151010-83-0294	20151010-83	2016/03/05	15:40:25	mammal	golden taikn	3	33.6643	107.543	1655	2015-10-10	2016-04-12
1412	CQ-20151010-83-0314	20151010-83	2016/03/16	17:36:34	mammal	golden taikn	1	33.6643	107.543	1655	2015-10-10	2016-04-12
1413	CQ-20151010-83-0318	20151010-83	2016/03/17	08:24:28	mammal	golden taikn	1	33.6643	107.543	1655	2015-10-10	2016-04-12
1414	CQ-20151010-83-0352	20151010-83	2016/03/31	18:11:42	mammal	golden taikn	1	33.6643	107.543	1655	2015-10-10	2016-04-12
1415	CQ-20151010-83-0370	20151010-83	2016/04/01	10:54:59	mammal	golden taikn	1	33.6643	107.543	1655	2015-10-10	2016-04-12
1416	CQ-20151010-83-0394	20151010-83	2016/04/03	18:20:03	mammal	golden taikn	1	33.6643	107.543	1655	2015-10-10	2016-04-12
1417	CQ-20151010-83-0396	20151010-83	2016/04/03	19:26:42	mammal	golden taikn	1	33.6643	107.543	1655	2015-10-10	2016-04-12
1418	CQ-20151010-83-0398	20151010-83	2016/04/04	02:44:33	mammal	golden taikn	1	33.6643	107.543	1655	2015-10-10	2016-04-12
1419	CQ-20151010-83-0400	20151010-83	2016/04/04	06:19:32	mammal	golden taikn	1	33.6643	107.543	1655	2015-10-10	2016-04-12
1420	CQ-20151010-83-0402	20151010-83	2016/04/04	06:58:15	mammal	golden taikn	1	33.6643	107.543	1655	2015-10-10	2016-04-12
1421	CQ-20151010-83-0404	20151010-83	2016/04/06	07:31:34	mammal	golden taikn	1	33.6643	107.543	1655	2015-10-10	2016-04-12
1422	CQ-20151010-83-0406	20151010-83	2016/04/06	08:15:05	mammal	golden taikn	1	33.6643	107.543	1655	2015-10-10	2016-04-12
1423	CQ-20151010-83-0418	20151010-83	2016/04/09	14:05:15	mammal	golden taikn	1	33.6643	107.543	1655	2015-10-10	2016-04-12
1424	CQ-20151010-84-0113	20151010-84	2016/02/24	00:49:35	mammal	golden taikn	2	33.6805	107.565	1707	2015-10-10	2016-04-13
1425	CQ-20151010-84-0125	20151010-84	2016/02/29	18:31:35	mammal	golden taikn	1	33.6805	107.565	1707	2015-10-10	2016-04-13
1426	CQ-20151010-84-0149	20151010-84	2016/02/29	20:14:35	mammal	golden taikn	2	33.6805	107.565	1707	2015-10-10	2016-04-13
1427	CQ-20151010-84-0153	20151010-84	2016/02/29	21:00:05	mammal	golden taikn	2	33.6805	107.565	1707	2015-10-10	2016-04-13
1428	CQ-20151010-84-0157	20151010-84	2016/02/29	21:41:48	mammal	golden taikn	2	33.6805	107.565	1707	2015-10-10	2016-04-13
1429	CQ-20151010-84-0181	20151010-84	2016/02/29	22:30:25	mammal	golden taikn	2	33.6805	107.565	1707	2015-10-10	2016-04-13
1430	CQ-20151010-84-0209	20151010-84	2016/03/01	00:35:41	mammal	golden taikn	2	33.6805	107.565	1707	2015-10-10	2016-04-13
1431	CQ-20151010-84-0245	20151010-84	2016/03/25	08:12:39	mammal	golden taikn	1	33.6805	107.565	1707	2015-10-10	2016-04-13
1432	CQ-20151010-84-0257	20151010-84	2016/03/30	14:40:59	mammal	golden taikn	1	33.6805	107.565	1707	2015-10-10	2016-04-13
1433	CQ-20151010-84-0261	20151010-84	2016/04/03	18:39:33	mammal	golden taikn	1	33.6805	107.565	1707	2015-10-10	2016-04-13
1434	CQ-20151010-84-0273	20151010-84	2016/04/11	18:42:27	mammal	golden taikn	1	33.6805	107.565	1707	2015-10-10	2016-04-13
1435	CQ-20151010-84-0277	20151010-84	2016/04/12	13:16:13	mammal	golden taikn	1	33.6805	107.565	1707	2015-10-10	2016-04-13
1436	CQ-20151010-91-0014	20151010-91	2015/11/12	16:42:25	mammal	golden taikn	1	33.6643	107.599	1992	2015-10-10	2016-04-13
1437	CQ-20151010-91-0214	20151010-91	2016/03/28	07:56:58	mammal	golden taikn	1	33.6643	107.599	1992	2015-10-10	2016-04-13
1438	CQ-20151010-94-0145	20151010-94	2015/12/30	07:16:24	mammal	golden taikn	1	33.6604	107.565	1426	2015-10-10	2016-04-13
1439	CQ-20151011-02-0360	20151011-02	2016/03/12	03:03:15	mammal	golden taikn	1	33.4476	107.722	1055	2015-10-11	2016-04-07
1440	CQ-20151011-14-0041	20151011-14	2015/10/22	17:51:09	mammal	golden taikn	1	33.5602	107.645	1569	2015-10-11	2016-04-08
1441	CQ-20151011-14-0049	20151011-14	2015/10/22	23:42:40	mammal	golden taikn	1	33.5602	107.645	1569	2015-10-11	2016-04-08
1442	CQ-20151011-14-0053	20151011-14	2015/10/23	01:14:04	mammal	golden taikn	1	33.5602	107.645	1569	2015-10-11	2016-04-08
1443	CQ-20151011-14-0061	20151011-14	2015/10/23	07:22:56	mammal	golden taikn	1	33.5602	107.645	1569	2015-10-11	2016-04-08
1444	CQ-20151011-14-0069	20151011-14	2015/11/05	08:59:37	mammal	golden taikn	1	33.5602	107.645	1569	2015-10-11	2016-04-08
1445	CQ-20151011-14-0389	20151011-14	2016/03/21	16:23:42	mammal	golden taikn	1	33.5602	107.645	1569	2015-10-11	2016-04-08
1446	CQ-20151011-14-0413	20151011-14	2016/03/29	03:47:22	mammal	golden taikn	1	33.5602	107.645	1569	2015-10-11	2016-04-08
1447	CQ-20151011-14-0421	20151011-14	2016/03/30	17:34:59	mammal	golden taikn	1	33.5602	107.645	1569	2015-10-11	2016-04-08
1448	CQ-20151011-14-0437	20151011-14	2016/04/01	19:23:01	mammal	golden taikn	1	33.5602	107.645	1569	2015-10-11	2016-04-08
1449	CQ-20151011-14-0445	20151011-14	2016/04/04	15:20:46	mammal	golden taikn	1	33.5602	107.645	1569	2015-10-11	2016-04-08
1450	CQ-20151011-14-0449	20151011-14	2016/04/04	17:06:09	mammal	golden taikn	1	33.5602	107.645	1569	2015-10-11	2016-04-08
1451	CQ-20151011-14-0461	20151011-14	2016/04/06	13:36:13	mammal	golden taikn	1	33.5602	107.645	1569	2015-10-11	2016-04-08
1452	CQ-20151011-36-0025	20151011-36	2015/10/29	16:12:17	mammal	golden taikn	1	33.5716	107.702	1466	2015-10-11	2016-04-08
1453	CQ-20151011-36-0031	20151011-36	2015/10/29	17:51:41	mammal	golden taikn	1	33.5716	107.702	1466	2015-10-11	2016-04-08
1454	CQ-20151011-36-0044	20151011-36	2015/11/16	16:55:42	mammal	golden taikn	1	33.5716	107.702	1466	2015-10-11	2016-04-08
1455	CQ-20151011-36-0049	20151011-36	2015/11/22	07:42:42	mammal	golden taikn	1	33.5716	107.702	1466	2015-10-11	2016-04-08
1456	CQ-20151011-36-0101	20151011-36	2016/02/21	10:14:00	mammal	golden taikn	1	33.5716	107.702	1466	2015-10-11	2016-04-08
1457	CQ-20151011-51-0017	20151011-51	2015/10/23	23:45:21	mammal	golden taikn	1	33.5801	107.596	1430	2015-10-11	2016-03-16
1458	CQ-20151011-51-0023	20151011-51	2015/11/13	12:58:14	mammal	golden taikn	1	33.5801	107.596	1430	2015-10-11	2016-03-16
1459	CQ-20151011-52-0019	20151011-52	2015/12/16	16:39:43	mammal	golden taikn	1	33.644	107.451	1610	2015-10-11	2016-04-10
1460	CQ-20151011-52-0045	20151011-52	2016/01/13	18:28:37	mammal	golden taikn	1	33.644	107.451	1610	2015-10-11	2016-04-10
1461	CQ-20151011-52-0055	20151011-52	2016/03/15	14:28:09	mammal	golden taikn	1	33.644	107.451	1610	2015-10-11	2016-04-10
1462	CQ-20151011-52-0065	20151011-52	2016/03/21	16:14:59	mammal	golden taikn	1	33.644	107.451	1610	2015-10-11	2016-04-10
1463	CQ-20151011-52-0077	20151011-52	2016/04/04	17:59:59	mammal	golden taikn	1	33.644	107.451	1610	2015-10-11	2016-04-10
1464	CQ-20151011-53-0105	20151011-53	2015/12/11	22:36:34	mammal	golden taikn	1	33.6567	107.475	1620	2015-10-11	2016-04-06
1465	CQ-20151011-53-0115	20151011-53	2015/12/12	03:21:33	mammal	golden taikn	1	33.6567	107.475	1620	2015-10-11	2016-04-06
1466	CQ-20151011-53-0149	20151011-53	2016/02/20	22:16:59	mammal	golden taikn	2	33.6567	107.475	1620	2015-10-11	2016-04-06
1467	CQ-20151011-53-0163	20151011-53	2016/03/18	02:55:05	mammal	golden taikn	1	33.6567	107.475	1620	2015-10-11	2016-04-06
1468	CQ-20151011-53-0187	20151011-53	2016/04/06	01:54:17	mammal	golden taikn	1	33.6567	107.475	1620	2015-10-11	2016-04-06
1469	CQ-20151011-60-0021	20151011-60	2011/01/13	19:41:04	mammal	golden taikn	1	33.645	107.464	1553	2015-10-11	2016-04-08
1470	CQ-20151011-60-0023	20151011-60	2011/01/22	08:12:59	mammal	golden taikn	1	33.645	107.464	1553	2015-10-11	2016-04-08
1471	CQ-20151011-60-0029	20151011-60	2011/01/22	09:03:32	mammal	golden taikn	1	33.645	107.464	1553	2015-10-11	2016-04-08
1472	CQ-20151011-60-0035	20151011-60	2011/01/23	23:46:26	mammal	golden taikn	1	33.645	107.464	1553	2015-10-11	2016-04-08
1473	CQ-20151011-60-0037	20151011-60	2011/01/24	23:47:49	mammal	golden taikn	1	33.645	107.464	1553	2015-10-11	2016-04-08
1474	CQ-20151011-60-0041	20151011-60	2011/01/25	01:26:54	mammal	golden taikn	1	33.645	107.464	1553	2015-10-11	2016-04-08
1475	CQ-20151011-60-0091	20151011-60	2011/02/10	00:05:31	mammal	golden taikn	2	33.645	107.464	1553	2015-10-11	2016-04-08
1476	CQ-20151011-60-0135	20151011-60	2011/03/04	18:29:46	mammal	golden taikn	1	33.645	107.464	1553	2015-10-11	2016-04-08
1477	CQ-20151011-60-0145	20151011-60	2011/03/09	08:48:17	mammal	golden taikn	1	33.645	107.464	1553	2015-10-11	2016-04-08
1478	CQ-20151011-60-0149	20151011-60	2011/03/09	10:32:15	mammal	golden taikn	1	33.645	107.464	1553	2015-10-11	2016-04-08
1479	CQ-20151011-60-0155	20151011-60	2011/03/09	12:08:08	mammal	golden taikn	1	33.645	107.464	1553	2015-10-11	2016-04-08
1480	CQ-20151011-60-0159	20151011-60	2011/03/09	14:46:32	mammal	golden taikn	1	33.645	107.464	1553	2015-10-11	2016-04-08
1481	CQ-20151011-60-0161	20151011-60	2011/03/09	16:45:35	mammal	golden taikn	2	33.645	107.464	1553	2015-10-11	2016-04-08
1482	CQ-20151011-60-0173	20151011-60	2011/03/15	05:23:00	mammal	golden taikn	1	33.645	107.464	1553	2015-10-11	2016-04-08
1483	CQ-20151011-60-0301	20151011-60	2011/07/01	05:27:18	mammal	golden taikn	1	33.645	107.464	1553	2015-10-11	2016-04-08
1484	CQ-20151011-65-0013	20151011-65	2014/11/18	11:56:13	mammal	golden taikn	1	33.597	107.602	1855	2015-10-11	2016-04-17
1485	CQ-20151011-65-0015	20151011-65	2014/11/24	16:45:13	mammal	golden taikn	1	33.597	107.602	1855	2015-10-11	2016-04-17
1486	CQ-20151011-72-1051	20151011-72	2015/11/19	11:01:55	mammal	golden taikn	1	33.579	107.611	1432	2015-10-11	2016-04-16
1487	CQ-20151011-79-0022	20151011-79	2015/11/1	6:35:18	mammal	golden taikn	1	33.696	107.632	2644	2015-10-11	2016-04-12
1488	CQ-20151011-79-0045	20151011-79	2015/11/15	12:00:04	mammal	golden taikn	1	33.696	107.632	2644	2015-10-11	2016-04-12
1489	CQ-20151011-79-0053	20151011-79	2015/11/18	12:54:56	mammal	golden taikn	1	33.696	107.632	2644	2015-10-11	2016-04-12
1490	CQ-20151011-79-0063	20151011-79	2015/11/26	09:08:23	mammal	golden taikn	1	33.696	107.632	2644	2015-10-11	2016-04-12
1491	CQ-20151011-79-0087	20151011-79	2015/12/23	14:50:25	mammal	golden taikn	1	33.696	107.632	2644	2015-10-11	2016-04-12
1492	CQ-20151011-79-0113	20151011-79	2015/12/23	16:21:31	mammal	golden taikn	1	33.696	107.632	2644	2015-10-11	2016-04-12
1493	CQ-20151011-79-0117	20151011-79	2015/12/24	01:53:42	mammal	golden taikn	1	33.696	107.632	2644	2015-10-11	2016-04-12
1494	CQ-20151011-79-0119	20151011-79	2015/12/24	02:56:19	mammal	golden taikn	1	33.696	107.632	2644	2015-10-11	2016-04-12
1495	CQ-20151011-79-0125	20151011-79	2015/12/24	07:33:49	mammal	golden taikn	1	33.696	107.632	2644	2015-10-11	2016-04-12
1496	CQ-20151011-79-0129	20151011-79	2015/12/24	09:09:25	mammal	golden taikn	2	33.696	107.632	2644	2015-10-11	2016-04-12
1497	CQ-20151011-79-0137	20151011-79	2016/03/05	19:07:10	mammal	golden taikn	1	33.696	107.632	2644	2015-10-11	2016-04-12
1498	CQ-20151011-79-0143	20151011-79	2016/03/06	05:45:31	mammal	golden taikn	1	33.696	107.632	2644	2015-10-11	2016-04-12
1499	CQ-20151011-79-0151	20151011-79	2016/03/15	10:25:16	mammal	golden taikn	1	33.696	107.632	2644	2015-10-11	2016-04-12
1500	CQ-20151011-79-0155	20151011-79	2016/03/15	10:35:30	mammal	golden taikn	1	33.696	107.632	2644	2015-10-11	2016-04-12
1501	CQ-20151011-79-0157	20151011-79	2016/03/15	18:34:29	mammal	golden taikn	1	33.696	107.632	2644	2015-10-11	2016-04-12
1502	CQ-20151011-95-0009	20151011-95	2015/10/12	14:45:14	mammal	golden taikn	1	33.7141	107.614	2743	2015-10-11	2016-04-12
1503	CQ-20151011-95-0029	20151011-95	2015/10/15	15:07:51	mammal	golden taikn	1	33.7141	107.614	2743	2015-10-11	2016-04-12
1504	CQ-20151011-95-0057	20151011-95	2015/10/25	18:02:24	mammal	golden taikn	2	33.7141	107.614	2743	2015-10-11	2016-04-12
1505	CQ-20151011-95-0071	20151011-95	2016/01/01	17:26:49	mammal	golden taikn	1	33.7141	107.614	2743	2015-10-11	2016-04-12
1506	CQ-20151011-95-0089	20151011-95	2016/03/05	10:21:29	mammal	golden taikn	1	33.7141	107.614	2743	2015-10-11	2016-04-12
1507	CQ-20151011-99-0003	20151011-99	2015/10/13	06:52:33	mammal	golden taikn	1	33.7151	107.633	2567	2015-10-11	2016-04-12
1508	CQ-20151011-99-0027	20151011-99	2015/10/31	18:50:27	mammal	golden taikn	1	33.7151	107.633	2567	2015-10-11	2016-04-12
1509	CQ-20151011-99-0031	20151011-99	2015/11/07	17:57:23	mammal	golden taikn	1	33.7151	107.633	2567	2015-10-11	2016-04-12
1510	CQ-20151011-99-0033	20151011-99	2015/11/08	00:52:26	mammal	golden taikn	1	33.7151	107.633	2567	2015-10-11	2016-04-12
1511	CQ-20151011-99-0042	20151011-99	2015/11/15	12:58:46	mammal	golden taikn	1	33.7151	107.633	2567	2015-10-11	2016-04-12
1512	CQ-20151011-99-0045	20151011-99	2015/11/15	14:54:25	mammal	golden taikn	1	33.7151	107.633	2567	2015-10-11	2016-04-12
1513	CQ-20151011-99-0047	20151011-99	2015/11/17	14:11:42	mammal	golden taikn	1	33.7151	107.633	2567	2015-10-11	2016-04-12
1514	CQ-20151011-99-0049	20151011-99	2015/11/18	08:24:59	mammal	golden taikn	1	33.7151	107.633	2567	2015-10-11	2016-04-12
1515	CQ-20151011-99-0059	20151011-99	2015/11/18	10:10:08	mammal	golden taikn	1	33.7151	107.633	2567	2015-10-11	2016-04-12
1516	CQ-20151011-99-0067	20151011-99	2015/11/18	13:15:12	mammal	golden taikn	1	33.7151	107.633	2567	2015-10-11	2016-04-12
1517	CQ-20151011-99-0077	20151011-99	2015/11/18	16:00:49	mammal	golden taikn	1	33.7151	107.633	2567	2015-10-11	2016-04-12
1518	CQ-20151011-99-0083	20151011-99	2015/11/26	08:54:30	mammal	golden taikn	1	33.7151	107.633	2567	2015-10-11	2016-04-12
1519	CQ-20151011-99-0089	20151011-99	2015/11/26	10:04:10	mammal	golden taikn	1	33.7151	107.633	2567	2015-10-11	2016-04-12
1520	CQ-20151011-99-0091	20151011-99	2015/11/26	13:38:55	mammal	golden taikn	1	33.7151	107.633	2567	2015-10-11	2016-04-12
1521	CQ-20151011-99-0099	20151011-99	2015/11/27	10:38:04	mammal	golden taikn	1	33.7151	107.633	2567	2015-10-11	2016-04-12
1522	CQ-20151011-99-0111	20151011-99	2015/12/20	12:49:13	mammal	golden taikn	1	33.7151	107.633	2567	2015-10-11	2016-04-12
1523	CQ-20151011-99-0147	20151011-99	2015/12/20	14:18:36	mammal	golden taikn	1	33.7151	107.633	2567	2015-10-11	2016-04-12
1524	CQ-20151011-99-0153	20151011-99	2015/12/20	15:22:50	mammal	golden taikn	2	33.7151	107.633	2567	2015-10-11	2016-04-12
1525	CQ-20151011-99-0161	20151011-99	2015/12/23	15:53:39	mammal	golden taikn	1	33.7151	107.633	2567	2015-10-11	2016-04-12
1526	CQ-20151011-99-0173	20151011-99	2015/12/23	16:51:30	mammal	golden taikn	1	33.7151	107.633	2567	2015-10-11	2016-04-12
1527	CQ-20151011-99-0187	20151011-99	2015/12/23	17:49:08	mammal	golden taikn	1	33.7151	107.633	2567	2015-10-11	2016-04-12
1528	CQ-20151011-99-0193	20151011-99	2015/12/24	01:52:47	mammal	golden taikn	1	33.7151	107.633	2567	2015-10-11	2016-04-12
1529	CQ-20151011-99-0195	20151011-99	2015/12/24	02:38:38	mammal	golden taikn	1	33.7151	107.633	2567	2015-10-11	2016-04-12
1530	CQ-20151011-99-0199	20151011-99	2015/12/24	09:21:49	mammal	golden taikn	1	33.7151	107.633	2567	2015-10-11	2016-04-12
1531	CQ-20151011-99-0207	20151011-99	2016/01/10	16:53:30	mammal	golden taikn	1	33.7151	107.633	2567	2015-10-11	2016-04-12
1532	CQ-20151011-99-0209	20151011-99	2016/01/11	02:01:31	mammal	golden taikn	1	33.7151	107.633	2567	2015-10-11	2016-04-12
1533	CQ-20151011-99-0211	20151011-99	2016/01/14	07:36:29	mammal	golden taikn	1	33.7151	107.633	2567	2015-10-11	2016-04-12
1534	CQ-20151011-99-0235	20151011-99	2016/03/05	19:26:45	mammal	golden taikn	1	33.7151	107.633	2567	2015-10-11	2016-04-12
1535	CQ-20151011-99-0237	20151011-99	2016/03/06	05:17:56	mammal	golden taikn	1	33.7151	107.633	2567	2015-10-11	2016-04-12
1536	CQ-20151011-99-0249	20151011-99	2016/03/15	10:30:47	mammal	golden taikn	1	33.7151	107.633	2567	2015-10-11	2016-04-12
1537	CQ-20151011-99-0253	20151011-99	2016/03/15	11:25:58	mammal	golden taikn	1	33.7151	107.633	2567	2015-10-11	2016-04-12
1538	CQ-20151011-99-0259	20151011-99	2016/03/15	18:35:10	mammal	golden taikn	1	33.7151	107.633	2567	2015-10-11	2016-04-12
1539	CQ-20151011-99-0263	20151011-99	2016/03/24	15:06:15	mammal	golden taikn	1	33.7151	107.633	2567	2015-10-11	2016-04-12
1540	CQ-20151012-103-0019	20151012-103	2015/11/12	07:50:07	mammal	golden taikn	1	33.681	107.504	1782	2015-10-12	2016-04-14
1541	CQ-20151012-103-0029	20151012-103	2015/11/18	14:31:14	mammal	golden taikn	1	33.681	107.504	1782	2015-10-12	2016-04-14
1542	CQ-20151012-103-0037	20151012-103	2015/11/30	21:21:04	mammal	golden taikn	1	33.681	107.504	1782	2015-10-12	2016-04-14
1543	CQ-20151012-103-0063	20151012-103	2016/01/15	14:54:50	mammal	golden taikn	1	33.681	107.504	1782	2015-10-12	2016-04-14
1544	CQ-20151012-103-0081	20151012-103	2016/02/09	16:33:11	mammal	golden taikn	1	33.681	107.504	1782	2015-10-12	2016-04-14
1545	CQ-20151012-103-0121	20151012-103	2016/04/07	17:51:05	mammal	golden taikn	1	33.681	107.504	1782	2015-10-12	2016-04-14
1546	CQ-20151012-103-0129	20151012-103	2016/04/09	16:36:48	mammal	golden taikn	1	33.681	107.504	1782	2015-10-12	2016-04-14
1547	CQ-20151012-103-0135	20151012-103	2016/04/10	13:57:21	mammal	golden taikn	1	33.681	107.504	1782	2015-10-12	2016-04-14
1548	CQ-20151012-11-0082	20151012-11	2015/12/23	00:24:46	mammal	golden taikn	1	33.5653	107.675	1252	2015-10-12	2016-04-07
1549	CQ-20151012-11-0088	20151012-11	2015/12/23	01:54:24	mammal	golden taikn	1	33.5653	107.675	1252	2015-10-12	2016-04-07
1550	CQ-20151012-11-0146	20151012-11	2016/03/20	06:12:34	mammal	golden taikn	1	33.5653	107.675	1252	2015-10-12	2016-04-07
1551	CQ-20151012-11-0150	20151012-11	2016/03/20	13:34:59	mammal	golden taikn	1	33.5653	107.675	1252	2015-10-12	2016-04-07
1552	CQ-20151012-11-0156	20151012-11	2016/03/22	00:05:58	mammal	golden taikn	1	33.5653	107.675	1252	2015-10-12	2016-04-07
1553	CQ-20151012-11-0184	20151012-11	2016/04/04	15:23:38	mammal	golden taikn	1	33.5653	107.675	1252	2015-10-12	2016-04-07
1554	CQ-20151012-17-0105	20151012-17	2016/02/05	17:59:44	mammal	golden taikn	1	33.541	107.634	1599	2015-10-12	2016-04-07
1555	CQ-20151012-17-0109	20151012-17	2016/02/06	07:39:36	mammal	golden taikn	1	33.541	107.634	1599	2015-10-12	2016-04-07
1556	CQ-20151012-18-0017	20151012-18	2015/10/26	08:59:43	mammal	golden taikn	1	33.5659	107.657	1588	2015-10-12	2016-04-07
1557	CQ-20151012-18-0025	20151012-18	2015/10/30	07:05:06	mammal	golden taikn	1	33.5659	107.657	1588	2015-10-12	2016-04-07
1558	CQ-20151012-18-0029	20151012-18	2015/11/02	14:08:05	mammal	golden taikn	1	33.5659	107.657	1588	2015-10-12	2016-04-07
1559	CQ-20151012-18-0033	20151012-18	2015/11/07	11:46:41	mammal	golden taikn	1	33.5659	107.657	1588	2015-10-12	2016-04-07
1560	CQ-20151012-18-0041	20151012-18	2015/11/07	16:40:36	mammal	golden taikn	2	33.5659	107.657	1588	2015-10-12	2016-04-07
1561	CQ-20151012-18-0045	20151012-18	2015/11/11	08:53:51	mammal	golden taikn	5	33.5659	107.657	1588	2015-10-12	2016-04-07
1562	CQ-20151012-18-0073	20151012-18	2016/01/13	09:50:59	mammal	golden taikn	1	33.5659	107.657	1588	2015-10-12	2016-04-07
1563	CQ-20151012-18-0081	20151012-18	2016/01/13	15:01:27	mammal	golden taikn	3	33.5659	107.657	1588	2015-10-12	2016-04-07
1564	CQ-20151012-18-0101	20151012-18	2016/02/23	14:19:54	mammal	golden taikn	1	33.5659	107.657	1588	2015-10-12	2016-04-07
1565	CQ-20151012-18-0109	20151012-18	2016/02/28	14:46:48	mammal	golden taikn	1	33.5659	107.657	1588	2015-10-12	2016-04-07
1566	CQ-20151012-18-0121	20151012-18	2016/02/28	15:50:25	mammal	golden taikn	1	33.5659	107.657	1588	2015-10-12	2016-04-07
1567	CQ-20151012-18-0125	20151012-18	2016/02/28	17:05:13	mammal	golden taikn	7	33.5659	107.657	1588	2015-10-12	2016-04-07
1568	CQ-20151012-18-0141	20151012-18	2016/02/28	18:43:18	mammal	golden taikn	1	33.5659	107.657	1588	2015-10-12	2016-04-07
1569	CQ-20151012-18-0145	20151012-18	2016/02/29	03:38:08	mammal	golden taikn	1	33.5659	107.657	1588	2015-10-12	2016-04-07
1570	CQ-20151012-54-0038	20151012-54	2015/10/18	14:09:23	mammal	golden taikn	1	33.7111	107.603	2702	2015-10-12	2016-04-12
1571	CQ-20151012-54-0042	20151012-54	2015/11/11	15:02:51	mammal	golden taikn	1	33.7111	107.603	2702	2015-10-12	2016-04-12
1572	CQ-20151012-54-0044	20151012-54	2015/11/26	13:54:21	mammal	golden taikn	1	33.7111	107.603	2702	2015-10-12	2016-04-12
1573	CQ-20151012-54-0046	20151012-54	2015/11/26	15:24:28	mammal	golden taikn	1	33.7111	107.603	2702	2015-10-12	2016-04-12
1574	CQ-20151012-54-0048	20151012-54	2015/11/28	09:49:53	mammal	golden taikn	1	33.7111	107.603	2702	2015-10-12	2016-04-12
1575	CQ-20151012-54-0050	20151012-54	2015/11/29	12:27:19	mammal	golden taikn	1	33.7111	107.603	2702	2015-10-12	2016-04-12
1576	CQ-20151012-54-0052	20151012-54	2015/11/29	13:07:00	mammal	golden taikn	1	33.7111	107.603	2702	2015-10-12	2016-04-12
1577	CQ-20151012-54-0054	20151012-54	2015/11/30	23:49:51	mammal	golden taikn	1	33.7111	107.603	2702	2015-10-12	2016-04-12
1578	CQ-20151012-54-0056	20151012-54	2015/12/08	13:31:09	mammal	golden taikn	1	33.7111	107.603	2702	2015-10-12	2016-04-12
1579	CQ-20151012-54-0058	20151012-54	2016/01/03	14:55:25	mammal	golden taikn	1	33.7111	107.603	2702	2015-10-12	2016-04-12
1580	CQ-20151012-54-0060	20151012-54	2016/01/09	15:24:11	mammal	golden taikn	2	33.7111	107.603	2702	2015-10-12	2016-04-12
1581	CQ-20151012-54-0068	20151012-54	2016/01/18	16:30:00	mammal	golden taikn	1	33.7111	107.603	2702	2015-10-12	2016-04-12
1582	CQ-20151012-54-0070	20151012-54	2016/01/26	08:30:18	mammal	golden taikn	1	33.7111	107.603	2702	2015-10-12	2016-04-12
1583	CQ-20151012-54-0088	20151012-54	2016/02/06	08:46:47	mammal	golden taikn	1	33.7111	107.603	2702	2015-10-12	2016-04-12
1584	CQ-20151012-54-0090	20151012-54	2016/02/07	14:39:36	mammal	golden taikn	1	33.7111	107.603	2702	2015-10-12	2016-04-12
1585	CQ-20151012-54-0092	20151012-54	2016/02/08	06:41:58	mammal	golden taikn	1	33.7111	107.603	2702	2015-10-12	2016-04-12
1586	CQ-20151012-54-0094	20151012-54	2016/02/08	13:26:17	mammal	golden taikn	1	33.7111	107.603	2702	2015-10-12	2016-04-12
1587	CQ-20151012-54-0100	20151012-54	2016/02/18	08:34:57	mammal	golden taikn	1	33.7111	107.603	2702	2015-10-12	2016-04-12
1588	CQ-20151012-54-0104	20151012-54	2016/02/19	17:29:58	mammal	golden taikn	1	33.7111	107.603	2702	2015-10-12	2016-04-12
1589	CQ-20151012-61-0003	20151012-61	2015/11/10	12:48:31	mammal	golden taikn	1	33.6812	107.508	1751	2015-10-12	2016-04-14
1590	CQ-20151012-96-0022	20151012-96	2016/1/3	8:44:48	mammal	golden taikn	1	33.6935	107.599	2159	2015-10-12	2016-04-12
1591	CQ-20151013-09-0017	20151013-09	2015/10/15	15:38:14	mammal	golden taikn	1	33.5316	107.634	1555	2015-10-13	2016-04-08
1592	CQ-20151013-09-0081	20151013-09	2015/10/27	17:47:21	mammal	golden taikn	1	33.5316	107.634	1555	2015-10-13	2016-04-08
1593	CQ-20151013-09-0121	20151013-09	2015/11/22	09:22:43	mammal	golden taikn	1	33.5316	107.634	1555	2015-10-13	2016-04-08
1594	CQ-20151013-09-0145	20151013-09	2015/11/26	11:54:40	mammal	golden taikn	1	33.5316	107.634	1555	2015-10-13	2016-04-08
1595	CQ-20151013-09-0177	20151013-09	2015/12/06	11:53:24	mammal	golden taikn	1	33.5316	107.634	1555	2015-10-13	2016-04-08
1596	CQ-20151013-09-0365	20151013-09	2016/02/04	07:56:24	mammal	golden taikn	1	33.5316	107.634	1555	2015-10-13	2016-04-08
1597	CQ-20151014-86-0015	20151014-86	2015/10/30	15:02:17	mammal	golden taikn	1	33.6855	107.622	2333	2015-10-14	2016-04-13
1598	CQ-20151014-86-0019	20151014-86	2015/11/04	18:25:14	mammal	golden taikn	4	33.6855	107.622	2333	2015-10-14	2016-04-13
1599	CQ-20151014-86-0043	20151014-86	2015/11/04	20:37:39	mammal	golden taikn	4	33.6855	107.622	2333	2015-10-14	2016-04-13
1600	CQ-20151014-86-0049	20151014-86	2015/11/04	21:29:58	mammal	golden taikn	3	33.6855	107.622	2333	2015-10-14	2016-04-13
1601	CQ-20151014-86-0067	20151014-86	2015/11/04	23:14:21	mammal	golden taikn	2	33.6855	107.622	2333	2015-10-14	2016-04-13
1602	CQ-20151014-86-0069	20151014-86	2015/11/04	23:45:49	mammal	golden taikn	1	33.6855	107.622	2333	2015-10-14	2016-04-13
1603	CQ-20151014-86-0081	20151014-86	2015/11/05	01:36:39	mammal	golden taikn	1	33.6855	107.622	2333	2015-10-14	2016-04-13
1604	CQ-20151014-86-0083	20151014-86	2015/11/05	07:00:57	mammal	golden taikn	1	33.6855	107.622	2333	2015-10-14	2016-04-13
1605	CQ-20151014-86-0085	20151014-86	2015/11/05	10:37:52	mammal	golden taikn	1	33.6855	107.622	2333	2015-10-14	2016-04-13
1606	CQ-20151014-86-0087	20151014-86	2015/11/05	12:06:45	mammal	golden taikn	1	33.6855	107.622	2333	2015-10-14	2016-04-13
1607	CQ-20151014-86-0093	20151014-86	2015/11/05	13:10:18	mammal	golden taikn	1	33.6855	107.622	2333	2015-10-14	2016-04-13
1608	CQ-20151014-86-0097	20151014-86	2015/11/26	10:45:30	mammal	golden taikn	1	33.6855	107.622	2333	2015-10-14	2016-04-13
1609	CQ-20151015-03-0029	20151015-03	2015/12/04	16:34:24	mammal	golden taikn	1	33.46402	107.72303	1461	2015-10-15	2016-04-08
1610	CQ-20151015-03-0033	20151015-03	2015/12/05	07:57:24	mammal	golden taikn	1	33.46402	107.72303	1461	2015-10-15	2016-04-08
1611	CQ-20151015-03-0035	20151015-03	2015/12/05	17:01:16	mammal	golden taikn	1	33.46402	107.72303	1461	2015-10-15	2016-04-08
1612	CQ-20151015-03-0037	20151015-03	2015/12/05	17:49:17	mammal	golden taikn	1	33.46402	107.72303	1461	2015-10-15	2016-04-08
1613	CQ-20151015-03-0064	20151015-03	2016/04/01	07:55:20	mammal	golden taikn	2	33.46402	107.72303	1461	2015-10-15	2016-04-08
1614	CQ-20151015-06-0013	20151015-06	2015/11/13	09:10:47	mammal	golden taikn	2	33.561	107.705	1290	2015-10-15	2016-04-12
1615	CQ-20151015-06-0047	20151015-06	2016/01/09	15:01:22	mammal	golden taikn	1	33.561	107.705	1290	2015-10-15	2016-04-12
1616	CQ-20151015-06-0049	20151015-06	2016/01/09	23:40:33	mammal	golden taikn	1	33.561	107.705	1290	2015-10-15	2016-04-12
1617	CQ-20151015-06-0053	20151015-06	2016/01/10	01:29:34	mammal	golden taikn	1	33.561	107.705	1290	2015-10-15	2016-04-12
1618	CQ-20151015-06-0069	20151015-06	2016/02/03	10:30:46	mammal	golden taikn	2	33.561	107.705	1290	2015-10-15	2016-04-12
1619	CQ-20151015-06-0144	20151015-06	2016/3/6	16:30:24	mammal	golden taikn	1	33.561	107.705	1290	2015-10-15	2016-04-12
1620	CQ-20151015-23-0013	20151015-23（33号卡）	2015/10/23	05:08:29	mammal	golden taikn	1	33.5958	107.691	1345	2015-10-15	2016-03-26
1621	CQ-20151015-23-0015	20151015-23（33号卡）	2015/10/23	06:37:07	mammal	golden taikn	1	33.5958	107.691	1345	2015-10-15	2016-03-26
1622	CQ-20151015-23-0029	20151015-23（33号卡）	2015/10/25	00:19:35	mammal	golden taikn	1	33.5958	107.691	1345	2015-10-15	2016-03-26
1623	CQ-20151015-23-0031	20151015-23（33号卡）	2015/10/26	00:35:12	mammal	golden taikn	2	33.5958	107.691	1345	2015-10-15	2016-03-26
1624	CQ-20151015-23-0037	20151015-23（33号卡）	2015/10/26	11:37:04	mammal	golden taikn	1	33.5958	107.691	1345	2015-10-15	2016-03-26
1625	CQ-20151015-23-0039	20151015-23（33号卡）	2015/10/27	07:18:10	mammal	golden taikn	1	33.5958	107.691	1345	2015-10-15	2016-03-26
1626	CQ-20151015-23-0041	20151015-23（33号卡）	2015/11/02	00:26:34	mammal	golden taikn	1	33.5958	107.691	1345	2015-10-15	2016-03-26
1627	CQ-20151015-23-0047	20151015-23（33号卡）	2015/11/08	07:19:42	mammal	golden taikn	1	33.5958	107.691	1345	2015-10-15	2016-03-26
1628	CQ-20151015-23-0051	20151015-23（33号卡）	2015/11/08	18:06:44	mammal	golden taikn	1	33.5958	107.691	1345	2015-10-15	2016-03-26
1629	CQ-20151015-23-0055	20151015-23（33号卡）	2015/11/25	19:27:30	mammal	golden taikn	1	33.5958	107.691	1345	2015-10-15	2016-03-26
1630	CQ-20151015-23-0061	20151015-23（33号卡）	2015/12/18	23:08:28	mammal	golden taikn	1	33.5958	107.691	1345	2015-10-15	2016-03-26
1631	CQ-20151015-45-0073	20151015-45	2015/11/05	06:26:53	mammal	golden taikn	1	33.5861	107.706	1239	2015-10-15	2016-02-16
1632	CQ-20151015-45-0085	20151015-45	2015/11/07	17:25:19	mammal	golden taikn	1	33.5861	107.706	1239	2015-10-15	2016-02-16
1633	CQ-20151015-45-0089	20151015-45	2015/11/07	22:22:01	mammal	golden taikn	1	33.5861	107.706	1239	2015-10-15	2016-02-16
1634	CQ-20151015-45-0104	20151015-45	2015/11/17	22:34:04	mammal	golden taikn	1	33.5861	107.706	1239	2015-10-15	2016-02-16
1635	CQ-20151015-45-0113	20151015-45	2015/12/25	22:20:38	mammal	golden taikn	1	33.5861	107.706	1239	2015-10-15	2016-02-16
1636	CQ-20151015-45-0117	20151015-45	2016/01/01	08:41:32	mammal	golden taikn	1	33.5861	107.706	1239	2015-10-15	2016-02-16
1637	CQ-20151016-57-0005	20151016-57	2015/10/17	16:53:45	mammal	golden taikn	1	33.6662	107.501	1521	2015-10-16	2016-04-07
1638	CQ-20151016-57-0017	20151016-57	2015/11/05	15:04:03	mammal	golden taikn	1	33.6662	107.501	1521	2015-10-16	2016-04-07
1639	CQ-20151016-57-0019	20151016-57	2015/11/07	14:33:05	mammal	golden taikn	1	33.6662	107.501	1521	2015-10-16	2016-04-07
1640	CQ-20151016-57-0023	20151016-57	2015/11/08	08:30:01	mammal	golden taikn	1	33.6662	107.501	1521	2015-10-16	2016-04-07
1641	CQ-20151016-57-0043	20151016-57	2016/03/16	18:23:44	mammal	golden taikn	1	33.6662	107.501	1521	2015-10-16	2016-04-07
1642	CQ-20151017-13-0037	20151017-13	2015/11/01	01:21:18	mammal	golden taikn	1	33.5304	107.707	1249	2015-10-17	2016-04-07
1643	CQ-20151017-13-0153	20151017-13	2015/11/15	09:46:05	mammal	golden taikn	1	33.5304	107.707	1249	2015-10-17	2016-04-07
1644	CQ-20151017-13-0165	20151017-13	2015/11/16	14:29:58	mammal	golden taikn	1	33.5304	107.707	1249	2015-10-17	2016-04-07
1645	CQ-20151017-13-0181	20151017-13	2015/11/21	16:06:11	mammal	golden taikn	1	33.5304	107.707	1249	2015-10-17	2016-04-07
1646	CQ-20151017-13-0229	20151017-13	2015/12/22	07:52:33	mammal	golden taikn	1	33.5304	107.707	1249	2015-10-17	2016-04-07
1647	CQ-20151017-13-0233	20151017-13	2015/12/27	22:55:41	mammal	golden taikn	1	33.5304	107.707	1249	2015-10-17	2016-04-07
1648	CQ-20151017-13-0269	20151017-13	2016/01/17	18:25:08	mammal	golden taikn	1	33.5304	107.707	1249	2015-10-17	2016-04-07
1649	CQ-20151017-13-0289	20151017-13	2016/01/17	22:37:19	mammal	golden taikn	1	33.5304	107.707	1249	2015-10-17	2016-04-07
1650	CQ-20151017-13-0297	20151017-13	2016/01/19	18:11:47	mammal	golden taikn	1	33.5304	107.707	1249	2015-10-17	2016-04-07
1651	CQ-20151017-13-0697	20151017-13	2016/03/27	08:17:31	mammal	golden taikn	1	33.5304	107.707	1249	2015-10-17	2016-04-07
1652	CQ-20151017-13-0745	20151017-13	2016/03/31	09:22:44	mammal	golden taikn	1	33.5304	107.707	1249	2015-10-17	2016-04-07
1653	CQ-20151017-13-0753	20151017-13	2016/03/31	09:58:08	mammal	golden taikn	1	33.5304	107.707	1249	2015-10-17	2016-04-07
1654	CQ-20151017-66-0065	20151017-66	2015/11/13	15:34:09	mammal	golden taikn	1	33.6351	107.596	2064	2015-10-17	2016-04-18
1655	CQ-20151017-66-0257	20151017-66	2016/03/14	18:21:15	mammal	golden taikn	1	33.6351	107.596	2064	2015-10-17	2016-04-18
1656	CQ-20151017-66-0337	20151017-66	2016/04/08	06:17:07	mammal	golden taikn	1	33.6351	107.596	2064	2015-10-17	2016-04-18
1657	CQ-20151017-71-0005	20151017-71	2015/11/02	02:20:02	mammal	golden taikn	1	33.6153	107.58	1566	2015-10-17	2016-04-18
1658	CQ-20151017-71-0011	20151017-71	2015/11/11	15:52:06	mammal	golden taikn	1	33.6153	107.58	1566	2015-10-17	2016-04-18
1659	CQ-20151017-71-0075	20151017-71	2016/03/29	05:30:07	mammal	golden taikn	1	33.6153	107.58	1566	2015-10-17	2016-04-18
1660	CQ-20151017-73-0062	20151017-73	2016/04/16	18:44:32	mammal	golden taikn	1	33.6112	107.626	1884	2015-10-17	2016-04-18
1661	CQ-20151017-75-0005	20151017-75	2015/11/07	21:45:00	mammal	golden taikn	1	33.6289	107.599	1775	2015-10-17	2016-04-17
1662	CQ-20151017-75-0027	20151017-75	2016/02/19	18:47:26	mammal	golden taikn	1	33.6289	107.599	1775	2015-10-17	2016-04-17
1663	CQ-20151017-75-0035	20151017-75	2016/03/25	02:06:37	mammal	golden taikn	1	33.6289	107.599	1775	2015-10-17	2016-04-17
1664	CQ-20151017-75-0047	20151017-75	2016/04/10	14:12:15	mammal	golden taikn	1	33.6289	107.599	1775	2015-10-17	2016-04-17
1665	CQ-20151017-76-0013	20151017-76	2015/11/10	17:11:10	mammal	golden taikn	1	33.6057	107.59	1987	2015-10-17	2016-04-18
1666	CQ-20151017-76-0055	20151017-76	2016/04/06	15:31:23	mammal	golden taikn	1	33.6057	107.59	1987	2015-10-17	2016-04-18
1667	CQ-20151017-76-0059	20151017-76	2016/04/16	02:51:41	mammal	golden taikn	1	33.6057	107.59	1987	2015-10-17	2016-04-18
1668	CQ-20151017-76-0061	20151017-76	2016/04/16	05:19:43	mammal	golden taikn	1	33.6057	107.59	1987	2015-10-17	2016-04-18
1669	CQ-20151017-98-0025	20151017-98	2015/11/09	17:42:02	mammal	golden taikn	1	33.633	107.618	2155	2015-10-17	2016-04-18
1670	CQ-20151017-98-0115	20151017-98	2016/03/30	08:57:36	mammal	golden taikn	1	33.633	107.618	2155	2015-10-17	2016-04-18
1671	CQ-20151017-98-0125	20151017-98	2016/04/08	01:36:23	mammal	golden taikn	1	33.633	107.618	2155	2015-10-17	2016-04-18
1672	CQ-20151017-98-0178	20151017-98	2016/4/10	14:58:44	mammal	golden taikn	1	33.633	107.618	2155	2015-10-17	2016-04-18
1673	CQ-20151018-08-0065	20151018-08	2016/02/25	18:14:53	mammal	golden taikn	1	33.5278	107.695	1133	2015-10-18	2016-04-07
1674	CQ-20151018-26-0001	20151018-26	2015/10/28	01:06:57	mammal	golden taikn	1	33.6318	107.665	1792	2015-10-18	2016-04-19
1675	CQ-20151018-26-0003	20151018-26	2015/11/11	17:06:37	mammal	golden taikn	2	33.6318	107.665	1792	2015-10-18	2016-04-19
1676	CQ-20151018-26-0009	20151018-26	2015/11/20	10:50:48	mammal	golden taikn	1	33.6318	107.665	1792	2015-10-18	2016-04-19
1677	CQ-20151018-26-0021	20151018-26	2015/11/20	12:22:46	mammal	golden taikn	1	33.6318	107.665	1792	2015-10-18	2016-04-19
1678	CQ-20151018-26-0023	20151018-26	2015/11/20	13:01:12	mammal	golden taikn	1	33.6318	107.665	1792	2015-10-18	2016-04-19
1679	CQ-20151018-26-0029	20151018-26	2015/11/20	15:36:03	mammal	golden taikn	1	33.6318	107.665	1792	2015-10-18	2016-04-19
1680	CQ-20151018-26-0035	20151018-26	2015/11/23	14:48:30	mammal	golden taikn	1	33.6318	107.665	1792	2015-10-18	2016-04-19
1681	CQ-20151018-26-0047	20151018-26	2016/01/31	11:35:26	mammal	golden taikn	1	33.6318	107.665	1792	2015-10-18	2016-04-19
1682	CQ-20151018-26-0061	20151018-26	2016/03/07	14:51:12	mammal	golden taikn	1	33.6318	107.665	1792	2015-10-18	2016-04-19
1683	CQ-20151018-26-0063	20151018-26	2016/03/19	03:13:42	mammal	golden taikn	1	33.6318	107.665	1792	2015-10-18	2016-04-19
1684	CQ-20151018-26-0067	20151018-26	2016/03/19	08:12:20	mammal	golden taikn	1	33.6318	107.665	1792	2015-10-18	2016-04-19
1685	CQ-20151018-26-0069	20151018-26	2016/03/21	14:55:09	mammal	golden taikn	1	33.6318	107.665	1792	2015-10-18	2016-04-19
1686	CQ-20151018-26-0075	20151018-26	2016/03/21	18:14:07	mammal	golden taikn	1	33.6318	107.665	1792	2015-10-18	2016-04-19
1687	CQ-20151018-26-0077	20151018-26	2016/03/22	14:53:09	mammal	golden taikn	1	33.6318	107.665	1792	2015-10-18	2016-04-19
1688	CQ-20151018-26-0081	20151018-26	2016/03/22	16:26:11	mammal	golden taikn	1	33.6318	107.665	1792	2015-10-18	2016-04-19
1689	CQ-20151018-26-0095	20151018-26	2016/03/26	14:53:00	mammal	golden taikn	2	33.6318	107.665	1792	2015-10-18	2016-04-19
1690	CQ-20151018-26-0099	20151018-26	2016/03/29	10:06:20	mammal	golden taikn	2	33.6318	107.665	1792	2015-10-18	2016-04-19
1691	CQ-20151018-26-0103	20151018-26	2016/03/31	13:01:23	mammal	golden taikn	3	33.6318	107.665	1792	2015-10-18	2016-04-19
1692	CQ-20151018-26-0107	20151018-26	2016/04/05	18:36:03	mammal	golden taikn	1	33.6318	107.665	1792	2015-10-18	2016-04-19
1693	CQ-20151018-26-0111	20151018-26	2016/04/07	11:16:24	mammal	golden taikn	1	33.6318	107.665	1792	2015-10-18	2016-04-19
1694	CQ-20151018-26-0113	20151018-26	2016/04/12	23:24:56	mammal	golden taikn	1	33.6318	107.665	1792	2015-10-18	2016-04-19
1695	CQ-20151018-26-0115	20151018-26	2016/04/14	15:25:47	mammal	golden taikn	1	33.6318	107.665	1792	2015-10-18	2016-04-19
1696	CQ-20151018-26-0117	20151018-26	2016/04/15	19:30:52	mammal	golden taikn	1	33.6318	107.665	1792	2015-10-18	2016-04-19
1697	CQ-20151018-30-0003	20151018-30	2015/10/24	13:21:53	mammal	golden taikn	1	33.623	107.661	1660	2015-10-18	2016-04-19
1698	CQ-20151018-30-0009	20151018-30	2015/11/08	13:39:38	mammal	golden taikn	1	33.623	107.661	1660	2015-10-18	2016-04-19
1699	CQ-20151018-30-0011	20151018-30	2015/11/12	14:10:50	mammal	golden taikn	1	33.623	107.661	1660	2015-10-18	2016-04-19
1700	CQ-20151018-30-0013	20151018-30	2015/11/12	14:49:00	mammal	golden taikn	1	33.623	107.661	1660	2015-10-18	2016-04-19
1701	CQ-20151018-30-0017	20151018-30	2015/11/13	06:25:53	mammal	golden taikn	1	33.623	107.661	1660	2015-10-18	2016-04-19
1702	CQ-20151018-30-0021	20151018-30	2015/11/18	12:45:46	mammal	golden taikn	2	33.623	107.661	1660	2015-10-18	2016-04-19
1703	CQ-20151018-30-0023	20151018-30	2015/11/20	13:57:03	mammal	golden taikn	1	33.623	107.661	1660	2015-10-18	2016-04-19
1704	CQ-20151018-30-0029	20151018-30	2015/12/21	05:11:03	mammal	golden taikn	1	33.623	107.661	1660	2015-10-18	2016-04-19
1705	CQ-20151018-30-0055	20151018-30	2016/03/04	17:32:18	mammal	golden taikn	1	33.623	107.661	1660	2015-10-18	2016-04-19
1706	CQ-20151018-30-0215	20151018-30	2016/04/05	21:58:16	mammal	golden taikn	1	33.623	107.661	1660	2015-10-18	2016-04-19
1707	CQ-20151018-30-0219	20151018-30	2016/04/07	06:01:25	mammal	golden taikn	1	33.623	107.661	1660	2015-10-18	2016-04-19
1708	CQ-20151018-30-0223	20151018-30	2016/04/08	15:41:57	mammal	golden taikn	2	33.623	107.661	1660	2015-10-18	2016-04-19
1709	CQ-20151018-30-0235	20151018-30	2016/04/09	15:32:48	mammal	golden taikn	1	33.623	107.661	1660	2015-10-18	2016-04-19
1710	CQ-20151018-31-0003	20151018-31	2015/10/19	17:40:00	mammal	golden taikn	1	33.6411	107.671	1956	2015-10-18	2016-04-19
1711	CQ-20151018-31-0009	20151018-31	2015/10/24	17:02:26	mammal	golden taikn	1	33.6411	107.671	1956	2015-10-18	2016-04-19
1712	CQ-20151018-31-0011	20151018-31	2015/10/25	07:17:00	mammal	golden taikn	1	33.6411	107.671	1956	2015-10-18	2016-04-19
1713	CQ-20151018-31-0019	20151018-31	2015/10/31	16:46:50	mammal	golden taikn	2	33.6411	107.671	1956	2015-10-18	2016-04-19
1714	CQ-20151018-31-0021	20151018-31	2015/11/06	14:21:41	mammal	golden taikn	1	33.6411	107.671	1956	2015-10-18	2016-04-19
1715	CQ-20151018-31-0029	20151018-31	2015/12/18	12:34:59	mammal	golden taikn	1	33.6411	107.671	1956	2015-10-18	2016-04-19
1716	CQ-20151018-31-0037	20151018-31	2015/12/20	16:50:49	mammal	golden taikn	1	33.6411	107.671	1956	2015-10-18	2016-04-19
1717	CQ-20151018-31-0045	20151018-31	2015/12/21	15:12:25	mammal	golden taikn	1	33.6411	107.671	1956	2015-10-18	2016-04-19
1718	CQ-20151018-31-0047	20151018-31	2015/12/22	12:41:36	mammal	golden taikn	1	33.6411	107.671	1956	2015-10-18	2016-04-19
1719	CQ-20151018-31-0053	20151018-31	2016/01/19	14:53:40	mammal	golden taikn	1	33.6411	107.671	1956	2015-10-18	2016-04-19
1720	CQ-20151018-31-0066	20151018-31	2016/2/5	10:38:46	mammal	golden taikn	1	33.6411	107.671	1956	2015-10-18	2016-04-19
1721	CQ-20151018-31-0067	20151018-31	2016/02/07	09:23:25	mammal	golden taikn	1	33.6411	107.671	1956	2015-10-18	2016-04-19
1722	CQ-20151018-31-0077	20151018-31	2016/02/24	16:18:18	mammal	golden taikn	1	33.6411	107.671	1956	2015-10-18	2016-04-19
1723	CQ-20151019-27-0084	20151019-27	2015/10/24	13:49:30	mammal	golden taikn	1	33.6109	107.648	1637	2015-10-19	2016-04-18
1724	CQ-20151019-27-0252	20151019-27	2016/03/16	18:14:52	mammal	golden taikn	1	33.6109	107.648	1637	2015-10-19	2016-04-18
1725	CQ-20151019-27-0264	20151019-27	2016/03/26	19:18:57	mammal	golden taikn	1	33.6109	107.648	1637	2015-10-19	2016-04-18
1726	CQ-20151019-27-0280	20151019-27	2016/04/04	14:12:59	mammal	golden taikn	1	33.6109	107.648	1637	2015-10-19	2016-04-18
1727	CQ-20151019-27-0320	20151019-27	2016/04/10	18:36:11	mammal	golden taikn	1	33.6109	107.648	1637	2015-10-19	2016-04-18
1728	CQ-20151019-27-0324	20151019-27	2016/04/11	11:16:05	mammal	golden taikn	1	33.6109	107.648	1637	2015-10-19	2016-04-18
1729	CQ-20151020-21-0005	20151020-21	2015/11/20	02:02:42	mammal	golden taikn	1	33.6318	107.703	1900	2015-10-20	2016-04-13
1730	CQ-20151020-21-0007	20151020-21	2015/11/21	08:20:02	mammal	golden taikn	1	33.6318	107.703	1900	2015-10-20	2016-04-13
1731	CQ-20151020-21-0012	20151020-21	2016/03/29	14:47:36	mammal	golden taikn	1	33.6318	107.703	1900	2015-10-20	2016-04-13
1732	CQ-20151020-21-0022	20151020-21	2016/04/13	15:37:22	mammal	golden taikn	1	33.6318	107.703	1900	2015-10-20	2016-04-13
1733	CQ-20151020-24-0013	20151020-24	2015/11/07	00:54:02	mammal	golden taikn	1	33.6294	107.713	1765	2015-10-20	2016-04-13
1734	CQ-20151020-24-0015	20151020-24	2015/11/09	12:07:54	mammal	golden taikn	1	33.6294	107.713	1765	2015-10-20	2016-04-13
1735	CQ-20151020-24-0019	20151020-24	2015/11/13	16:29:41	mammal	golden taikn	1	33.6294	107.713	1765	2015-10-20	2016-04-13
1736	CQ-20151020-24-0023	20151020-24	2015/11/17	14:27:03	mammal	golden taikn	1	33.6294	107.713	1765	2015-10-20	2016-04-13
1737	CQ-20151020-24-0025	20151020-24	2015/11/30	10:27:56	mammal	golden taikn	1	33.6294	107.713	1765	2015-10-20	2016-04-13
1738	CQ-20151020-24-0033	20151020-24	2016/03/14	06:34:21	mammal	golden taikn	1	33.6294	107.713	1765	2015-10-20	2016-04-13
1739	CQ-20151020-24-0035	20151020-24	2016/03/14	17:24:59	mammal	golden taikn	1	33.6294	107.713	1765	2015-10-20	2016-04-13
1740	CQ-20151020-24-0037	20151020-24	2016/03/24	15:45:18	mammal	golden taikn	2	33.6294	107.713	1765	2015-10-20	2016-04-13
1741	CQ-20151020-24-0041	20151020-24	2016/03/27	11:14:43	mammal	golden taikn	1	33.6294	107.713	1765	2015-10-20	2016-04-13
1742	CQ-20151020-24-0043	20151020-24	2016/03/28	18:47:34	mammal	golden taikn	1	33.6294	107.713	1765	2015-10-20	2016-04-13
1743	CQ-20151020-24-0045	20151020-24	2016/03/29	13:28:30	mammal	golden taikn	1	33.6294	107.713	1765	2015-10-20	2016-04-13
1744	CQ-20151020-24-0049	20151020-24	2016/03/29	18:19:30	mammal	golden taikn	1	33.6294	107.713	1765	2015-10-20	2016-04-13
1745	CQ-20151020-24-0057	20151020-24	2016/03/30	09:12:30	mammal	golden taikn	1	33.6294	107.713	1765	2015-10-20	2016-04-13
1746	CQ-20151020-24-0059	20151020-24	2016/03/30	15:14:40	mammal	golden taikn	1	33.6294	107.713	1765	2015-10-20	2016-04-13
1747	CQ-20151020-24-0067	20151020-24	2016/04/03	15:41:40	mammal	golden taikn	1	33.6294	107.713	1765	2015-10-20	2016-04-13
1748	CQ-20151020-24-0069	20151020-24	2016/04/05	08:03:03	mammal	golden taikn	1	33.6294	107.713	1765	2015-10-20	2016-04-13
1749	CQ-20151020-24-0075	20151020-24	2016/04/05	08:55:08	mammal	golden taikn	1	33.6294	107.713	1765	2015-10-20	2016-04-13
1750	CQ-20151020-24-0077	20151020-24	2016/04/07	14:12:37	mammal	golden taikn	1	33.6294	107.713	1765	2015-10-20	2016-04-13
1751	CQ-20151020-24-0079	20151020-24	2016/04/08	09:13:03	mammal	golden taikn	1	33.6294	107.713	1765	2015-10-20	2016-04-13
1752	CQ-20151020-24-0081	20151020-24	2016/04/09	23:06:01	mammal	golden taikn	1	33.6294	107.713	1765	2015-10-20	2016-04-13
1753	CQ-20151020-24-0083	20151020-24	2016/04/10	09:19:30	mammal	golden taikn	1	33.6294	107.713	1765	2015-10-20	2016-04-13
1754	CQ-20151020-24-0085	20151020-24	2016/04/10	19:46:28	mammal	golden taikn	1	33.6294	107.713	1765	2015-10-20	2016-04-13
1755	CQ-20151020-24-0087	20151020-24	2016/04/11	17:28:35	mammal	golden taikn	1	33.6294	107.713	1765	2015-10-20	2016-04-13
1756	CQ-20151020-24-0089	20151020-24	2016/04/12	07:06:46	mammal	golden taikn	1	33.6294	107.713	1765	2015-10-20	2016-04-13
1757	CQ-20151020-24-0091	20151020-24	2016/04/13	06:15:49	mammal	golden taikn	1	33.6294	107.713	1765	2015-10-20	2016-04-13
1758	CQ-20151020-24-0093	20151020-24	2016/04/13	16:52:39	mammal	golden taikn	1	33.6294	107.713	1765	2015-10-20	2016-04-13
1759	CQ-20151020-46-0003	20151020-46	2015/10/21	10:03:53	mammal	golden taikn	1	33.6244	107.686	1780	2015-10-20	2016-04-13
1760	CQ-20151020-46-0009	20151020-46	2015/10/27	02:37:14	mammal	golden taikn	1	33.6244	107.686	1780	2015-10-20	2016-04-13
1761	CQ-20151020-46-0011	20151020-46	2015/11/07	08:12:06	mammal	golden taikn	1	33.6244	107.686	1780	2015-10-20	2016-04-13
1762	CQ-20151020-46-0013	20151020-46	2015/11/10	10:21:01	mammal	golden taikn	1	33.6244	107.686	1780	2015-10-20	2016-04-13
1763	CQ-20151020-46-0021	20151020-46	2015/11/10	15:34:08	mammal	golden taikn	1	33.6244	107.686	1780	2015-10-20	2016-04-13
1764	CQ-20151020-46-0033	20151020-46	2016/01/26	17:31:48	mammal	golden taikn	1	33.6244	107.686	1780	2015-10-20	2016-04-13
1765	CQ-20151021-43-0003	20151021-43（共4张，工作及资源各2张）	2015/10/22	17:05:25	mammal	golden taikn	1	33.603318	107.707102	1465	2015-10-21	2015-10-22
1766	CQ-20151104-81-0100	20151104-81	2016/03/12	16:20:13	mammal	golden taikn	1	33.65	107.582	1477	2015-11-04	2016-04-13
1767	CQ-20151104-81-0187	20151104-81	2016/04/09	00:06:31	mammal	golden taikn	1	33.65	107.582	1477	2015-11-04	2016-04-13
1768	CQ-20160407-01-0034	20160407-01	2016/05/07	13:52:52	mammal	golden taikn	1	33.5138	107.665	1333	2016-04-07	2016-10-18
1769	CQ-20160407-12-0005	20160407-12	2016/04/27	05:50:38	mammal	golden taikn	1	33.445	107.728	1147	2016-04-07	2016-10-16
1770	CQ-20160407-16-0502	20160407-16	2016/08/13	12:21:41	mammal	golden taikn	1	33.5309	107.665	1298	2016-04-07	2016-10-17
1771	CQ-20160407-16-0624	20160407-16	2016/09/15	12:21:22	mammal	golden taikn	1	33.5309	107.665	1298	2016-04-07	2016-10-17
1772	CQ-20160407-18-0009	20160407-18周勇安放	2016/04/08	13:34:51	mammal	golden taikn	1	33.567475	107.656423	1517	2016-04-07	2016-10-16
1773	CQ-20160407-18-0017	20160407-18周勇安放	2016/04/17	01:22:29	mammal	golden taikn	1	33.567475	107.656423	1517	2016-04-07	2016-10-16
1774	CQ-20160407-18-0027	20160407-18周勇安放	2016/04/24	16:49:05	mammal	golden taikn	1	33.567475	107.656423	1517	2016-04-07	2016-10-16
1775	CQ-20160407-18-0041	20160407-18周勇安放	2016/04/27	19:11:52	mammal	golden taikn	1	33.567475	107.656423	1517	2016-04-07	2016-10-16
1776	CQ-20160407-18-0093	20160407-18周勇安放	2016/05/07	17:03:36	mammal	golden taikn	1	33.567475	107.656423	1517	2016-04-07	2016-10-16
1777	CQ-20160407-18-0123	20160407-18周勇安放	2016/06/07	09:19:11	mammal	golden taikn	1	33.567475	107.656423	1517	2016-04-07	2016-10-16
1778	CQ-20160407-18-0149	20160407-18周勇安放	2016/06/25	12:17:25	mammal	golden taikn	1	33.567475	107.656423	1517	2016-04-07	2016-10-16
1779	CQ-20160407-18-0167	20160407-18周勇安放	2016/07/08	11:29:48	mammal	golden taikn	1	33.567475	107.656423	1517	2016-04-07	2016-10-16
1780	CQ-20160407-18-0169	20160407-18周勇安放	2016/07/09	05:46:41	mammal	golden taikn	1	33.567475	107.656423	1517	2016-04-07	2016-10-16
1781	CQ-20160407-18-0171	20160407-18周勇安放	2016/07/09	11:22:25	mammal	golden taikn	1	33.567475	107.656423	1517	2016-04-07	2016-10-16
1782	CQ-20160407-18-0179	20160407-18周勇安放	2016/07/09	13:15:04	mammal	golden taikn	1	33.567475	107.656423	1517	2016-04-07	2016-10-16
1783	CQ-20160407-18-0249	20160407-18周勇安放	2016/09/27	06:34:39	mammal	golden taikn	1	33.567475	107.656423	1517	2016-04-07	2016-10-16
1784	CQ-20160407-18-0251	20160407-18周勇安放	2016/09/28	07:20:56	mammal	golden taikn	1	33.567475	107.656423	1517	2016-04-07	2016-10-16
1785	CQ-20160407-44-0300	20160407-44	2016/08/11	12:17:14	mammal	golden taikn	1	33.5347	107.666	1352	2016-04-07	2016-10-17
1786	CQ-20160407-44-0304	20160407-44	2016/08/11	14:50:52	mammal	golden taikn	1	33.5347	107.666	1352	2016-04-07	2016-10-17
1787	CQ-20160407-44-0320	20160407-44	2016/08/13	14:35:56	mammal	golden taikn	1	33.5347	107.666	1352	2016-04-07	2016-10-17
1788	CQ-20160407-50-0317	20160407-50	2016/09/22	19:09:33	mammal	golden taikn	1	33.4998	107.696	1602	2016-04-07	2016-10-18
1789	CQ-20160407-59-0397	20160407-59	2016/08/30	16:49:49	mammal	golden taikn	1	33.6281	107.441	1760	2016-04-07	2016-10-19
1790	CQ-20160408-03-0521	20160408-03	2016/09/23	18:29:23	mammal	golden taikn	1	33.4646	107.736	1348	2016-04-08	2016-10-19
1791	CQ-20160408-03-0525	20160408-03	2016/09/25	19:30:26	mammal	golden taikn	1	33.4646	107.736	1348	2016-04-08	2016-10-19
1792	CQ-20160408-03-0529	20160408-03	2016/09/25	22:42:10	mammal	golden taikn	1	33.4646	107.736	1348	2016-04-08	2016-10-19
1793	CQ-20160408-104-0009	20160408-104	2016/04/10	18:04:52	mammal	golden taikn	4	33.673	107.521	1447	2016-04-08	2016-09-30
1794	CQ-20160408-104-0027	20160408-104	2016/04/11	07:32:39	mammal	golden taikn	1	33.673	107.521	1447	2016-04-08	2016-09-30
1795	CQ-20160408-104-0033	20160408-104	2016/04/11	12:45:31	mammal	golden taikn	1	33.673	107.521	1447	2016-04-08	2016-09-30
1796	CQ-20160408-104-0053	20160408-104	2016/04/28	06:43:41	mammal	golden taikn	1	33.673	107.521	1447	2016-04-08	2016-09-30
1797	CQ-20160408-36-0150	20160408-36	2016/06/08	18:29:11	mammal	golden taikn	1	33.5683	107.705	1661	2016-04-08	2016-10-19
1798	CQ-20160408-36-0374	20160408-36	2016/08/15	08:34:22	mammal	golden taikn	1	33.5683	107.705	1661	2016-04-08	2016-10-19
1799	CQ-20160408-36-0478	20160408-36	2016/09/15	16:02:53	mammal	golden taikn	1	33.5683	107.705	1661	2016-04-08	2016-10-19
1800	CQ-20160408-36-0562	20160408-36	2016/10/11	13:55:27	mammal	golden taikn	3	33.5683	107.705	1661	2016-04-08	2016-10-19
1801	CQ-20160408-M35-0905	20160408-M35	2016/10/09	11:16:29	mammal	golden taikn	1	33.55498	107.644427	1494	2016-04-08	2016-10-19
1802	CQ-20160410-23-0005	20160410-23	2016/04/10	13:54:47	mammal	golden taikn	1	33.59538	107.69687	1553	2016-04-10	2016-10-17
1803	CQ-20160410-23-0037	20160410-23	2016/04/27	19:07:41	mammal	golden taikn	1	33.59538	107.69687	1553	2016-04-10	2016-10-17
1804	CQ-20160410-23-0265	20160410-23	2016/08/31	11:39:38	mammal	golden taikn	1	33.59538	107.69687	1553	2016-04-10	2016-10-17
1805	CQ-20160410-23-0305	20160410-23	2016/09/16	15:39:00	mammal	golden taikn	1	33.59538	107.69687	1553	2016-04-10	2016-10-17
1806	CQ-20160410-33-0071	20160410-33	2016/05/28	11:52:24	mammal	golden taikn	1	33.58770	107.70782	1265	2016-04-10	2016-10-19
1807	CQ-20160410-33-0403	20160410-33	2016/08/30	11:36:49	mammal	golden taikn	1	33.58770	107.70782	1265	2016-04-10	2016-10-19
1808	CQ-20160410-33-0419	20160410-33	2016/09/05	13:17:57	mammal	golden taikn	1	33.58770	107.70782	1265	2016-04-10	2016-10-19
1809	CQ-20160410-35-0023	20160410-35	2016/05/04	18:42:20	mammal	golden taikn	1	33.55498	107.644427	1494	2016-04-08	2016-10-17
1810	CQ-20160410-42-0017	20160410-42	2016/04/23	07:22:06	mammal	golden taikn	1	33.6179	107.686	1837	2016-04-10	2016-11-04
1811	CQ-20160410-42-0019	20160410-42	2016/04/24	17:41:41	mammal	golden taikn	1	33.6179	107.686	1837	2016-04-10	2016-11-04
1812	CQ-20160410-42-0023	20160410-42	2016/04/25	14:56:18	mammal	golden taikn	1	33.6179	107.686	1837	2016-04-10	2016-11-04
1813	CQ-20160410-42-0025	20160410-42	2016/04/25	17:15:23	mammal	golden taikn	1	33.6179	107.686	1837	2016-04-10	2016-11-04
1814	CQ-20160410-42-0027	20160410-42	2016/04/25	20:00:40	mammal	golden taikn	1	33.6179	107.686	1837	2016-04-10	2016-11-04
1815	CQ-20160410-42-0033	20160410-42	2016/05/03	18:05:03	mammal	golden taikn	1	33.6179	107.686	1837	2016-04-10	2016-11-04
1816	CQ-20160410-42-0035	20160410-42	2016/05/04	00:04:44	mammal	golden taikn	1	33.6179	107.686	1837	2016-04-10	2016-11-04
1817	CQ-20160410-42-0039	20160410-42	2016/05/05	08:10:28	mammal	golden taikn	1	33.6179	107.686	1837	2016-04-10	2016-11-04
1818	CQ-20160410-42-0045	20160410-42	2016/05/06	19:47:37	mammal	golden taikn	1	33.6179	107.686	1837	2016-04-10	2016-11-04
1819	CQ-20160410-42-0047	20160410-42	2016/05/09	10:54:48	mammal	golden taikn	1	33.6179	107.686	1837	2016-04-10	2016-11-04
1820	CQ-20160410-42-0053	20160410-42	2016/05/18	08:27:17	mammal	golden taikn	1	33.6179	107.686	1837	2016-04-10	2016-11-04
1821	CQ-20160410-42-0059	20160410-42	2016/05/22	20:32:10	mammal	golden taikn	1	33.6179	107.686	1837	2016-04-10	2016-11-04
1822	CQ-20160410-42-0089	20160410-42	2016/06/06	10:33:11	mammal	golden taikn	1	33.6179	107.686	1837	2016-04-10	2016-11-04
1823	CQ-20160410-42-0381	20160410-42	2016/09/05	16:07:31	mammal	golden taikn	1	33.6179	107.686	1837	2016-04-10	2016-11-04
1824	CQ-20160410-42-0392	20160410-42	2016/9/13	19:33:06	mammal	golden taikn	1	33.6179	107.686	1837	2016-04-10	2016-11-04
1825	CQ-20160410-42-0395	20160410-42	2016/09/28	16:37:56	mammal	golden taikn	1	33.6179	107.686	1837	2016-04-10	2016-11-04
1826	CQ-20160410-42-0399	20160410-42	2016/10/12	10:46:57	mammal	golden taikn	1	33.6179	107.686	1837	2016-04-10	2016-11-04
1827	CQ-20160410-42-0417	20160410-42	2016/10/27	16:39:54	mammal	golden taikn	1	33.6179	107.686	1837	2016-04-10	2016-11-04
1828	CQ-20160410-42-0419	20160410-42	2016/10/28	09:13:05	mammal	golden taikn	1	33.6179	107.686	1837	2016-04-10	2016-11-04
1829	CQ-20160410-42-0421	20160410-42	2016/11/01	16:08:52	mammal	golden taikn	1	33.6179	107.686	1837	2016-04-10	2016-11-04
1830	CQ-20160410-49-0009	20160410-49	2016/04/19	18:32:34	mammal	golden taikn	1	33.4631	107.726	1365	2016-04-10	2016-10-19
1831	CQ-20160410-60-0017	20160410-60	2011/07/07	23:20:11	mammal	golden taikn	1	33.6488	107.471	1625	2016-04-10	2016-10-17
1832	CQ-20160410-60-0065	20160410-60	2011/07/26	15:37:45	mammal	golden taikn	1	33.6488	107.471	1625	2016-04-10	2016-10-17
1833	CQ-20160410-60-0681	20160410-60	2011/11/11	06:28:05	mammal	golden taikn	1	33.6488	107.471	1625	2016-04-10	2016-10-17
1834	CQ-20160410-60-0799	20160410-60	2011/12/31	16:49:44	mammal	golden taikn	1	33.6488	107.471	1625	2016-04-10	2016-10-17
1835	CQ-20160410-60-0806	20160410-60	2012/1/3	9:08:02	mammal	golden taikn	1	33.6488	107.471	1625	2016-04-10	2016-10-17
1836	CQ-20160410-60-0809	20160410-60	2012/01/04	17:20:50	mammal	golden taikn	1	33.6488	107.471	1625	2016-04-10	2016-10-17
1837	CQ-20160412-06-0164	20160412-06	2016/9/20	6:12:48	mammal	golden taikn	1	33.56	107.702	1227	2016-04-12	2016-10-16
1838	CQ-20160412-68-0009	20160412-68	2016/04/13	08:17:40	mammal	golden taikn	1	33.6792	107.546	2275	2016-04-12	2016-10-18
1839	CQ-20160412-68-0011	20160412-68	2016/04/13	14:09:15	mammal	golden taikn	1	33.6792	107.546	2275	2016-04-12	2016-10-18
1840	CQ-20160412-68-0027	20160412-68	2016/04/14	01:30:59	mammal	golden taikn	1	33.6792	107.546	2275	2016-04-12	2016-10-18
1841	CQ-20160412-68-0029	20160412-68	2016/04/14	19:06:14	mammal	golden taikn	1	33.6792	107.546	2275	2016-04-12	2016-10-18
1842	CQ-20160412-68-0047	20160412-68	2016/04/14	23:24:50	mammal	golden taikn	1	33.6792	107.546	2275	2016-04-12	2016-10-18
1843	CQ-20160412-68-0049	20160412-68	2016/04/15	06:30:22	mammal	golden taikn	1	33.6792	107.546	2275	2016-04-12	2016-10-18
1844	CQ-20160412-68-0055	20160412-68	2016/04/15	12:00:30	mammal	golden taikn	1	33.6792	107.546	2275	2016-04-12	2016-10-18
1845	CQ-20160412-68-0057	20160412-68	2016/04/16	04:02:03	mammal	golden taikn	1	33.6792	107.546	2275	2016-04-12	2016-10-18
1846	CQ-20160412-68-0077	20160412-68	2016/04/18	17:53:56	mammal	golden taikn	1	33.6792	107.546	2275	2016-04-12	2016-10-18
1847	CQ-20160412-68-0081	20160412-68	2016/04/18	19:28:25	mammal	golden taikn	1	33.6792	107.546	2275	2016-04-12	2016-10-18
1848	CQ-20160412-68-0111	20160412-68	2016/04/27	08:10:46	mammal	golden taikn	1	33.6792	107.546	2275	2016-04-12	2016-10-18
1849	CQ-20160412-68-0125	20160412-68	2016/04/27	23:24:56	mammal	golden taikn	1	33.6792	107.546	2275	2016-04-12	2016-10-18
1850	CQ-20160412-68-0143	20160412-68	2016/04/28	19:40:14	mammal	golden taikn	1	33.6792	107.546	2275	2016-04-12	2016-10-18
1851	CQ-20160412-68-0145	20160412-68	2016/04/28	23:26:54	mammal	golden taikn	1	33.6792	107.546	2275	2016-04-12	2016-10-18
1852	CQ-20160412-68-0149	20160412-68	2016/04/29	05:05:23	mammal	golden taikn	1	33.6792	107.546	2275	2016-04-12	2016-10-18
1853	CQ-20160412-68-0197	20160412-68	2016/05/04	23:17:12	mammal	golden taikn	1	33.6792	107.546	2275	2016-04-12	2016-10-18
1854	CQ-20160412-68-0203	20160412-68	2016/05/06	03:29:38	mammal	golden taikn	1	33.6792	107.546	2275	2016-04-12	2016-10-18
1855	CQ-20160412-68-0215	20160412-68	2016/05/13	08:31:37	mammal	golden taikn	1	33.6792	107.546	2275	2016-04-12	2016-10-18
1856	CQ-20160412-68-0217	20160412-68	2016/05/13	09:22:28	mammal	golden taikn	1	33.6792	107.546	2275	2016-04-12	2016-10-18
1857	CQ-20160412-68-0393	20160412-68	2016/07/31	06:53:51	mammal	golden taikn	1	33.6792	107.546	2275	2016-04-12	2016-10-18
1858	CQ-20160412-68-0505	20160412-68	2016/09/21	06:05:09	mammal	golden taikn	1	33.6792	107.546	2275	2016-04-12	2016-10-18
1859	CQ-20160412-68-0507	20160412-68	2016/09/21	10:27:36	mammal	golden taikn	1	33.6792	107.546	2275	2016-04-12	2016-10-18
1860	CQ-20160412-68-0510	20160412-68	2016/9/21	13:57:04	mammal	golden taikn	1	33.6792	107.546	2275	2016-04-12	2016-10-18
1861	CQ-20160412-68-0511	20160412-68	2016/09/21	17:08:08	mammal	golden taikn	1	33.6792	107.546	2275	2016-04-12	2016-10-18
1862	CQ-20160412-68-0513	20160412-68	2016/09/22	01:20:13	mammal	golden taikn	1	33.6792	107.546	2275	2016-04-12	2016-10-18
1863	CQ-20160412-68-0515	20160412-68	2016/09/22	06:27:06	mammal	golden taikn	1	33.6792	107.546	2275	2016-04-12	2016-10-18
1864	CQ-20160412-68-0521	20160412-68	2016/09/25	00:59:37	mammal	golden taikn	1	33.6792	107.546	2275	2016-04-12	2016-10-18
1865	CQ-20160412-68-0527	20160412-68	2016/09/28	02:04:29	mammal	golden taikn	1	33.6792	107.546	2275	2016-04-12	2016-10-18
1866	CQ-20160412-68-0557	20160412-68	2016/10/15	14:29:34	mammal	golden taikn	1	33.6792	107.546	2275	2016-04-12	2016-10-18
1867	CQ-20160412-83-0007	20160412-83	2016/04/14	17:44:59	mammal	golden taikn	6	33.6651	107.539	1648	2016-04-12	2016-10-18
1868	CQ-20160412-83-0021	20160412-83	2016/04/14	23:04:38	mammal	golden taikn	1	33.6651	107.539	1648	2016-04-12	2016-10-18
1869	CQ-20160412-83-0023	20160412-83	2016/04/15	12:05:34	mammal	golden taikn	1	33.6651	107.539	1648	2016-04-12	2016-10-18
1870	CQ-20160412-83-0033	20160412-83	2016/04/20	04:39:24	mammal	golden taikn	1	33.6651	107.539	1648	2016-04-12	2016-10-18
1871	CQ-20160412-83-0037	20160412-83	2016/04/20	17:06:16	mammal	golden taikn	1	33.6651	107.539	1648	2016-04-12	2016-10-18
1872	CQ-20160412-83-0041	20160412-83	2016/04/20	22:33:57	mammal	golden taikn	1	33.6651	107.539	1648	2016-04-12	2016-10-18
1873	CQ-20160412-83-0043	20160412-83	2016/04/20	23:51:38	mammal	golden taikn	1	33.6651	107.539	1648	2016-04-12	2016-10-18
1874	CQ-20160412-83-0047	20160412-83	2016/04/22	08:58:22	mammal	golden taikn	1	33.6651	107.539	1648	2016-04-12	2016-10-18
1875	CQ-20160412-83-0057	20160412-83	2016/04/30	05:42:58	mammal	golden taikn	1	33.6651	107.539	1648	2016-04-12	2016-10-18
1876	CQ-20160412-83-0061	20160412-83	2016/04/30	16:47:10	mammal	golden taikn	1	33.6651	107.539	1648	2016-04-12	2016-10-18
1877	CQ-20160412-83-0063	20160412-83	2016/05/01	07:14:25	mammal	golden taikn	1	33.6651	107.539	1648	2016-04-12	2016-10-18
1878	CQ-20160412-83-0097	20160412-83	2016/05/13	15:36:00	mammal	golden taikn	1	33.6651	107.539	1648	2016-04-12	2016-10-18
1879	CQ-20160412-83-0099	20160412-83	2016/05/13	17:58:05	mammal	golden taikn	1	33.6651	107.539	1648	2016-04-12	2016-10-18
1880	CQ-20160412-88-0025	20160412-88	2016/05/02	02:03:22	mammal	golden taikn	1	33.6954	107.619	2128	2016-04-12	2016-10-17
1881	CQ-20160412-88-0039	20160412-88	2016/05/05	18:55:51	mammal	golden taikn	1	33.6954	107.619	2128	2016-04-12	2016-10-17
1882	CQ-20160412-88-0113	20160412-88	2016/05/13	06:17:56	mammal	golden taikn	1	33.6954	107.619	2128	2016-04-12	2016-10-17
1883	CQ-20160412-88-0117	20160412-88	2016/05/13	16:53:43	mammal	golden taikn	1	33.6954	107.619	2128	2016-04-12	2016-10-17
1884	CQ-20160412-88-0119	20160412-88	2016/05/14	17:32:39	mammal	golden taikn	1	33.6954	107.619	2128	2016-04-12	2016-10-17
1885	CQ-20160412-88-0125	20160412-88	2016/05/16	06:08:20	mammal	golden taikn	1	33.6954	107.619	2128	2016-04-12	2016-10-17
1886	CQ-20160412-88-0129	20160412-88	2016/05/17	18:34:46	mammal	golden taikn	1	33.6954	107.619	2128	2016-04-12	2016-10-17
1887	CQ-20160412-88-0133	20160412-88	2016/05/17	19:16:22	mammal	golden taikn	1	33.6954	107.619	2128	2016-04-12	2016-10-17
1888	CQ-20160412-88-0141	20160412-88	2016/05/20	17:11:44	mammal	golden taikn	1	33.6954	107.619	2128	2016-04-12	2016-10-17
1889	CQ-20160412-88-0149	20160412-88	2016/05/24	22:06:19	mammal	golden taikn	1	33.6954	107.619	2128	2016-04-12	2016-10-17
1890	CQ-20160412-88-0157	20160412-88	2016/05/29	02:24:35	mammal	golden taikn	1	33.6954	107.619	2128	2016-04-12	2016-10-17
1891	CQ-20160412-88-0185	20160412-88	2016/06/10	19:08:29	mammal	golden taikn	1	33.6954	107.619	2128	2016-04-12	2016-10-17
1892	CQ-20160412-88-0305	20160412-88	2016/07/23	00:00:18	mammal	golden taikn	1	33.6954	107.619	2128	2016-04-12	2016-10-17
1893	CQ-20160412-88-0445	20160412-88	2016/08/02	19:13:23	mammal	golden taikn	1	33.6954	107.619	2128	2016-04-12	2016-10-17
1894	CQ-20160412-88-0457	20160412-88	2016/08/05	20:10:51	mammal	golden taikn	1	33.6954	107.619	2128	2016-04-12	2016-10-17
1895	CQ-20160412-88-0501	20160412-88	2016/08/20	04:33:49	mammal	golden taikn	1	33.6954	107.619	2128	2016-04-12	2016-10-17
1896	CQ-20160412-88-0525	20160412-88	2016/08/25	19:14:55	mammal	golden taikn	1	33.6954	107.619	2128	2016-04-12	2016-10-17
1897	CQ-20160412-88-0541	20160412-88	2016/08/28	06:22:20	mammal	golden taikn	1	33.6954	107.619	2128	2016-04-12	2016-10-17
1898	CQ-20160412-88-0597	20160412-88	2016/09/13	21:29:11	mammal	golden taikn	1	33.6954	107.619	2128	2016-04-12	2016-10-17
1899	CQ-20160412-88-0613	20160412-88	2016/09/19	08:17:53	mammal	golden taikn	1	33.6954	107.619	2128	2016-04-12	2016-10-17
1900	CQ-20160412-88-0617	20160412-88	2016/09/19	16:39:02	mammal	golden taikn	2	33.6954	107.619	2128	2016-04-12	2016-10-17
1901	CQ-20160412-88-0619	20160412-88	2016/09/19	17:45:06	mammal	golden taikn	1	33.6954	107.619	2128	2016-04-12	2016-10-17
1902	CQ-20160412-88-0621	20160412-88	2016/09/20	07:10:05	mammal	golden taikn	1	33.6954	107.619	2128	2016-04-12	2016-10-17
1903	CQ-20160412-88-0625	20160412-88	2016/09/20	15:01:59	mammal	golden taikn	1	33.6954	107.619	2128	2016-04-12	2016-10-17
1904	CQ-20160412-88-0691	20160412-88	2016/09/28	11:43:26	mammal	golden taikn	1	33.6954	107.619	2128	2016-04-12	2016-10-17
1905	CQ-20160412-88-0696	20160412-88	2016/9/28	13:13:38	mammal	golden taikn	1	33.6954	107.619	2128	2016-04-12	2016-10-17
1906	CQ-20160412-88-0705	20160412-88	2016/10/04	18:20:45	mammal	golden taikn	1	33.6954	107.619	2128	2016-04-12	2016-10-17
1907	CQ-20160412-88-0707	20160412-88	2016/10/10	15:41:06	mammal	golden taikn	1	33.6954	107.619	2128	2016-04-12	2016-10-17
1908	CQ-20160412-95-0029	20160412-95	2016/05/14	19:06:34	mammal	golden taikn	1	33.7045	107.626	2268	2016-04-12	2016-10-17
1909	CQ-20160412-95-0037	20160412-95	2016/05/23	18:19:31	mammal	golden taikn	1	33.7045	107.626	2268	2016-04-12	2016-10-17
1910	CQ-20160412-95-0039	20160412-95	2016/05/27	06:02:50	mammal	golden taikn	1	33.7045	107.626	2268	2016-04-12	2016-10-17
1911	CQ-20160412-95-0047	20160412-95	2016/05/27	07:28:48	mammal	golden taikn	1	33.7045	107.626	2268	2016-04-12	2016-10-17
1912	CQ-20160412-95-0051	20160412-95	2016/05/31	20:03:00	mammal	golden taikn	1	33.7045	107.626	2268	2016-04-12	2016-10-17
1913	CQ-20160412-95-0091	20160412-95	2016/07/11	17:46:02	mammal	golden taikn	1	33.7045	107.626	2268	2016-04-12	2016-10-17
1914	CQ-20160412-95-0197	20160412-95	2016/08/22	23:16:34	mammal	golden taikn	1	33.7045	107.626	2268	2016-04-12	2016-10-17
1915	CQ-20160412-95-0213	20160412-95	2016/08/23	19:58:05	mammal	golden taikn	1	33.7045	107.626	2268	2016-04-12	2016-10-17
1916	CQ-20160412-95-0216	20160412-95	2016/8/24	1:13:02	mammal	golden taikn	1	33.7045	107.626	2268	2016-04-12	2016-10-17
1917	CQ-20160412-95-0217	20160412-95	2016/08/24	06:31:52	mammal	golden taikn	1	33.7045	107.626	2268	2016-04-12	2016-10-17
1918	CQ-20160412-95-0265	20160412-95	2016/09/09	12:35:43	mammal	golden taikn	1	33.7045	107.626	2268	2016-04-12	2016-10-17
1919	CQ-20160412-95-0267	20160412-95	2016/09/13	17:44:45	mammal	golden taikn	1	33.7045	107.626	2268	2016-04-12	2016-10-17
1920	CQ-20160412-95-0269	20160412-95	2016/09/13	19:48:11	mammal	golden taikn	1	33.7045	107.626	2268	2016-04-12	2016-10-17
1921	CQ-20160412-95-0278	20160412-95	2016/9/14	19:08:22	mammal	golden taikn	1	33.7045	107.626	2268	2016-04-12	2016-10-17
1922	CQ-20160412-95-0283	20160412-95	2016/09/15	10:33:30	mammal	golden taikn	1	33.7045	107.626	2268	2016-04-12	2016-10-17
1923	CQ-20160412-95-0297	20160412-95	2016/09/19	00:56:11	mammal	golden taikn	1	33.7045	107.626	2268	2016-04-12	2016-10-17
1924	CQ-20160412-H16-0153	20160412-H16	2016/06/09	08:08:56	mammal	golden taikn	1	33.7003	107.643	2540	2016-04-12	2016-10-18
1925	CQ-20160412-H16-0235	20160412-H16	2016/07/12	06:07:48	mammal	golden taikn	1	33.7003	107.643	2540	2016-04-12	2016-10-18
1926	CQ-20160412-H16-0237	20160412-H16	2016/07/12	12:14:09	mammal	golden taikn	1	33.7003	107.643	2540	2016-04-12	2016-10-18
1927	CQ-20160412-H16-0257	20160412-H16	2016/07/14	13:04:29	mammal	golden taikn	1	33.7003	107.643	2540	2016-04-12	2016-10-18
1928	CQ-20160412-H16-0261	20160412-H16	2016/07/15	07:51:06	mammal	golden taikn	1	33.7003	107.643	2540	2016-04-12	2016-10-18
1929	CQ-20160412-H16-0270	20160412-H16	2016/7/16	6:57:06	mammal	golden taikn	1	33.7003	107.643	2540	2016-04-12	2016-10-18
1930	CQ-20160412-H16-0341	20160412-H16	2016/08/31	17:17:21	mammal	golden taikn	1	33.7003	107.643	2540	2016-04-12	2016-10-18
1931	CQ-20160412-H16-0355	20160412-H16	2016/09/06	10:27:27	mammal	golden taikn	1	33.7003	107.643	2540	2016-04-12	2016-10-18
1932	CQ-20160412-H16-0359	20160412-H16	2016/09/06	13:32:03	mammal	golden taikn	1	33.7003	107.643	2540	2016-04-12	2016-10-18
1933	CQ-20160412-H16-0361	20160412-H16	2016/09/07	01:12:36	mammal	golden taikn	1	33.7003	107.643	2540	2016-04-12	2016-10-18
1934	CQ-20160412-H16-0371	20160412-H16	2016/09/24	14:17:49	mammal	golden taikn	1	33.7003	107.643	2540	2016-04-12	2016-10-18
1935	CQ-20160412-H16-0375	20160412-H16	2016/09/24	16:44:05	mammal	golden taikn	1	33.7003	107.643	2540	2016-04-12	2016-10-18
1936	CQ-20160412-H16-0377	20160412-H16	2016/09/25	06:49:46	mammal	golden taikn	1	33.7003	107.643	2540	2016-04-12	2016-10-18
1937	CQ-20160412-H16-0382	20160412-H16	2016/9/26	12:24:10	mammal	golden taikn	1	33.7003	107.643	2540	2016-04-12	2016-10-18
1938	CQ-20160412-H22-0031	20160412-H22	2016/06/04	18:54:25	mammal	golden taikn	1	33.705	107.633	2461	2016-04-12	2016-10-18
1939	CQ-20160412-H22-0033	20160412-H22	2016/06/05	08:01:26	mammal	golden taikn	2	33.705	107.633	2461	2016-04-12	2016-10-18
1940	CQ-20160412-H22-0043	20160412-H22	2016/06/05	10:01:31	mammal	golden taikn	1	33.705	107.633	2461	2016-04-12	2016-10-18
1941	CQ-20160412-H22-0045	20160412-H22	2016/06/05	11:16:27	mammal	golden taikn	2	33.705	107.633	2461	2016-04-12	2016-10-18
1942	CQ-20160412-H22-0053	20160412-H22	2016/06/05	19:15:33	mammal	golden taikn	1	33.705	107.633	2461	2016-04-12	2016-10-18
1943	CQ-20160412-H22-0055	20160412-H22	2016/06/06	14:36:00	mammal	golden taikn	2	33.705	107.633	2461	2016-04-12	2016-10-18
1944	CQ-20160412-H22-0060	20160412-H22	2016/6/7	19:23:06	mammal	golden taikn	1	33.705	107.633	2461	2016-04-12	2016-10-18
1945	CQ-20160412-H22-0073	20160412-H22	2016/06/08	00:54:07	mammal	golden taikn	1	33.705	107.633	2461	2016-04-12	2016-10-18
1946	CQ-20160412-H22-0075	20160412-H22	2016/06/08	01:53:26	mammal	golden taikn	1	33.705	107.633	2461	2016-04-12	2016-10-18
1947	CQ-20160412-H22-0077	20160412-H22	2016/06/08	12:20:39	mammal	golden taikn	2	33.705	107.633	2461	2016-04-12	2016-10-18
1948	CQ-20160412-H22-0079	20160412-H22	2016/06/08	16:02:56	mammal	golden taikn	1	33.705	107.633	2461	2016-04-12	2016-10-18
1949	CQ-20160412-H22-0083	20160412-H22	2016/06/08	18:06:55	mammal	golden taikn	1	33.705	107.633	2461	2016-04-12	2016-10-18
1950	CQ-20160412-H22-0085	20160412-H22	2016/06/09	18:09:23	mammal	golden taikn	3	33.705	107.633	2461	2016-04-12	2016-10-18
1951	CQ-20160412-H22-0087	20160412-H22	2016/06/09	18:49:31	mammal	golden taikn	4	33.705	107.633	2461	2016-04-12	2016-10-18
1952	CQ-20160412-H22-0095	20160412-H22	2016/06/09	20:10:19	mammal	golden taikn	1	33.705	107.633	2461	2016-04-12	2016-10-18
1953	CQ-20160412-H22-0099	20160412-H22	2016/06/10	01:11:26	mammal	golden taikn	1	33.705	107.633	2461	2016-04-12	2016-10-18
1954	CQ-20160412-H22-0101	20160412-H22	2016/06/10	14:44:20	mammal	golden taikn	1	33.705	107.633	2461	2016-04-12	2016-10-18
1955	CQ-20160412-H22-0103	20160412-H22	2016/06/10	17:34:18	mammal	golden taikn	1	33.705	107.633	2461	2016-04-12	2016-10-18
1956	CQ-20160412-H22-0105	20160412-H22	2016/06/10	19:03:39	mammal	golden taikn	1	33.705	107.633	2461	2016-04-12	2016-10-18
1957	CQ-20160412-H22-0109	20160412-H22	2016/06/13	17:10:22	mammal	golden taikn	1	33.705	107.633	2461	2016-04-12	2016-10-18
1958	CQ-20160412-H22-0127	20160412-H22	2016/06/13	18:53:44	mammal	golden taikn	1	33.705	107.633	2461	2016-04-12	2016-10-18
1959	CQ-20160412-H22-0129	20160412-H22	2016/06/14	12:06:33	mammal	golden taikn	1	33.705	107.633	2461	2016-04-12	2016-10-18
1960	CQ-20160412-H22-0131	20160412-H22	2016/06/15	20:02:46	mammal	golden taikn	1	33.705	107.633	2461	2016-04-12	2016-10-18
1961	CQ-20160412-H22-0137	20160412-H22	2016/06/16	09:19:06	mammal	golden taikn	1	33.705	107.633	2461	2016-04-12	2016-10-18
1962	CQ-20160412-H22-0141	20160412-H22	2016/06/16	19:30:19	mammal	golden taikn	1	33.705	107.633	2461	2016-04-12	2016-10-18
1963	CQ-20160412-H22-0143	20160412-H22	2016/06/17	07:25:42	mammal	golden taikn	1	33.705	107.633	2461	2016-04-12	2016-10-18
1964	CQ-20160412-H22-0145	20160412-H22	2016/06/17	14:47:04	mammal	golden taikn	1	33.705	107.633	2461	2016-04-12	2016-10-18
1965	CQ-20160412-H22-0153	20160412-H22	2016/06/26	19:11:25	mammal	golden taikn	1	33.705	107.633	2461	2016-04-12	2016-10-18
1966	CQ-20160412-H22-0155	20160412-H22	2016/06/27	07:56:31	mammal	golden taikn	1	33.705	107.633	2461	2016-04-12	2016-10-18
1967	CQ-20160412-H22-0161	20160412-H22	2016/07/02	08:00:28	mammal	golden taikn	2	33.705	107.633	2461	2016-04-12	2016-10-18
1968	CQ-20160412-H22-0163	20160412-H22	2016/07/03	17:21:06	mammal	golden taikn	1	33.705	107.633	2461	2016-04-12	2016-10-18
1969	CQ-20160412-H22-0165	20160412-H22	2016/07/04	06:10:59	mammal	golden taikn	2	33.705	107.633	2461	2016-04-12	2016-10-18
1970	CQ-20160412-H22-0171	20160412-H22	2016/07/04	16:55:54	mammal	golden taikn	1	33.705	107.633	2461	2016-04-12	2016-10-18
1971	CQ-20160412-H22-0173	20160412-H22	2016/07/04	17:34:16	mammal	golden taikn	1	33.705	107.633	2461	2016-04-12	2016-10-18
1972	CQ-20160412-H22-0175	20160412-H22	2016/07/06	13:40:53	mammal	golden taikn	2	33.705	107.633	2461	2016-04-12	2016-10-18
1973	CQ-20160412-H22-0185	20160412-H22	2016/07/06	14:45:45	mammal	golden taikn	1	33.705	107.633	2461	2016-04-12	2016-10-18
1974	CQ-20160412-H22-0187	20160412-H22	2016/07/06	15:24:37	mammal	golden taikn	1	33.705	107.633	2461	2016-04-12	2016-10-18
1975	CQ-20160412-H22-0189	20160412-H22	2016/07/06	20:45:54	mammal	golden taikn	1	33.705	107.633	2461	2016-04-12	2016-10-18
1976	CQ-20160412-H22-0191	20160412-H22	2016/07/07	04:24:26	mammal	golden taikn	1	33.705	107.633	2461	2016-04-12	2016-10-18
1977	CQ-20160412-H22-0195	20160412-H22	2016/07/10	13:12:02	mammal	golden taikn	1	33.705	107.633	2461	2016-04-12	2016-10-18
1978	CQ-20160412-H22-0203	20160412-H22	2016/07/22	13:27:25	mammal	golden taikn	1	33.705	107.633	2461	2016-04-12	2016-10-18
1979	CQ-20160412-H22-0205	20160412-H22	2016/07/24	18:26:31	mammal	golden taikn	3	33.705	107.633	2461	2016-04-12	2016-10-18
1980	CQ-20160412-H22-0213	20160412-H22	2016/07/27	13:09:20	mammal	golden taikn	2	33.705	107.633	2461	2016-04-12	2016-10-18
1981	CQ-20160412-H36-0027	20160412-H36	2016/6/4	2:41:50	mammal	golden taikn	1	33.7003	107.603	2396	2016-04-12	2016-10-16
1982	CQ-20160412-H36-0028	20160412-H36	2016/06/04	03:49:56	mammal	golden taikn	1	33.7003	107.603	2396	2016-04-12	2016-10-16
1983	CQ-20160412-H36-0036	20160412-H36	2016/06/04	19:20:01	mammal	golden taikn	1	33.7003	107.603	2396	2016-04-12	2016-10-16
1984	CQ-20160412-H36-0038	20160412-H36	2016/06/06	09:04:52	mammal	golden taikn	1	33.7003	107.603	2396	2016-04-12	2016-10-16
1985	CQ-20160412-H36-0054	20160412-H36	2016/06/07	07:30:30	mammal	golden taikn	2	33.7003	107.603	2396	2016-04-12	2016-10-16
1986	CQ-20160412-H36-0068	20160412-H36	2016/06/11	18:58:02	mammal	golden taikn	1	33.7003	107.603	2396	2016-04-12	2016-10-16
1987	CQ-20160412-H36-0072	20160412-H36	2016/06/12	12:46:25	mammal	golden taikn	1	33.7003	107.603	2396	2016-04-12	2016-10-16
1988	CQ-20160412-H36-0074	20160412-H36	2016/06/12	17:33:54	mammal	golden taikn	1	33.7003	107.603	2396	2016-04-12	2016-10-16
1989	CQ-20160412-H36-0082	20160412-H36	2016/06/13	07:54:41	mammal	golden taikn	1	33.7003	107.603	2396	2016-04-12	2016-10-16
1990	CQ-20160412-H36-0084	20160412-H36	2016/06/13	18:57:05	mammal	golden taikn	1	33.7003	107.603	2396	2016-04-12	2016-10-16
1991	CQ-20160412-H36-0086	20160412-H36	2016/06/13	19:31:10	mammal	golden taikn	1	33.7003	107.603	2396	2016-04-12	2016-10-16
1992	CQ-20160412-H36-0088	20160412-H36	2016/06/14	04:55:39	mammal	golden taikn	1	33.7003	107.603	2396	2016-04-12	2016-10-16
1993	CQ-20160412-H36-0090	20160412-H36	2016/06/14	07:43:21	mammal	golden taikn	1	33.7003	107.603	2396	2016-04-12	2016-10-16
1994	CQ-20160412-H36-0134	20160412-H36	2016/06/20	19:10:14	mammal	golden taikn	1	33.7003	107.603	2396	2016-04-12	2016-10-16
1995	CQ-20160412-H36-0136	20160412-H36	2016/06/22	14:46:08	mammal	golden taikn	1	33.7003	107.603	2396	2016-04-12	2016-10-16
1996	CQ-20160412-H36-0140	20160412-H36	2016/06/23	20:02:44	mammal	golden taikn	1	33.7003	107.603	2396	2016-04-12	2016-10-16
1997	CQ-20160412-H36-0153	20160412-H36	2016/6/24	12:55:44	mammal	golden taikn	1	33.7003	107.603	2396	2016-04-12	2016-10-16
1998	CQ-20160412-H36-0154	20160412-H36	2016/06/24	13:36:30	mammal	golden taikn	1	33.7003	107.603	2396	2016-04-12	2016-10-16
1999	CQ-20160412-H36-0156	20160412-H36	2016/06/24	14:39:13	mammal	golden taikn	1	33.7003	107.603	2396	2016-04-12	2016-10-16
[truncated: 1,324 more rows]
